# Supplementary material for: Seasonal dynamics and molecular regulation of flavonoid biosynthesis in Cyclocarya paliurus (Batal.) Iljinsk
Source: Front Plant Sci. 2025 Mar 4;16:1525226. doi: 10.3389/fpls.2025.1525226 (PMC11917369; doi:10.3389/fpls.2025.1525226)
Supplement: Supplementary file 5 [file Table5.xls]

## Sheet: T10M-ML1_T10M-ML2_T10M-ML3_vs_T
#ID	T10M-ML1_Count	T10M-ML2_Count	T10M-ML3_Count	T11M-ML1_Count	T11M-ML2_Count	T11M-ML3_Count	T10M-ML1_FPKM	T10M-ML2_FPKM	T10M-ML3_FPKM	T11M-ML1_FPKM	T11M-ML2_FPKM	T11M-ML3_FPKM	Pvalue	log2FC	regulated	COG_class	COG_class_annotation	GO_annotation	KEGG_annotation	KEGG_pathway_annotation	KOG_class	KOG_class_annotation	Pfam_annotation	Swiss-Prot_annotation	eggNOG_class	eggNOG_class_annotation	NR_annotation
Cyclocarya_paliurus_newGene_27082	0	0	0	13822	13967	11260	0	0	0	93.6494	97.8454	91.4805	1.93907747185412e-07	7.1785831402774	up	[E]	Amino acid transport and metabolism	Biological Process: arginine catabolic process (GO:0006527);; Biological Process: spermidine biosynthetic process (GO:0008295);; Molecular Function: arginine decarboxylase activity (GO:0008792);;	K01583|0.0e+00|jre:109006541|K01583 arginine decarboxylase [EC:4.1.1.19] | (RefSeq) arginine decarboxylase-like	Arginine and proline metabolism (ko00330)	--	--	Pyridoxal-dependent decarboxylase, pyridoxal binding domain	Arginine decarboxylase 1 OS=Arabidopsis thaliana OX=3702 GN=ADC1 PE=1 SV=1	H	Coenzyme transport and metabolism	arginine decarboxylase-like [Juglans regia]
Cyclocarya_paliurus_newGene_23324	0	0	0	9579	8438	7372	0	0	0	87.7055	79.8866	80.944	2.2480675696458e-07	7.14442679704248	up	--	--	Cellular Component: integral component of membrane (GO:0016021);; Molecular Function: kinase activity (GO:0016301);;	--	--	[T]	Signal transduction mechanisms	Malectin-like domain	Probable receptor-like protein kinase At5g24010 OS=Arabidopsis thaliana OX=3702 GN=At5g24010 PE=1 SV=1	S	Function unknown	probable receptor-like protein kinase At5g24010 [Juglans regia]
Cyclocarya_paliurus_newGene_10735	0	0	0	7615	7738	6401	0	0	0	119.793	125.857	120.734	2.38804151198397e-07	7.13029015912902	up	[QV]	Secondary metabolites biosynthesis, transport and catabolism;; Defense mechanisms	Molecular Function: monooxygenase activity (GO:0004497);; Molecular Function: iron ion binding (GO:0005506);; Cellular Component: integral component of membrane (GO:0016021);; Molecular Function: oxidoreductase activity, acting on paired donors, with incorporation or reduction of molecular oxygen (GO:0016705);; Molecular Function: heme binding (GO:0020037);;	K20667|7.9e-285|jre:108989520|K20667 beta-amyrin 28-monooxygenase [EC:1.14.14.126] | (RefSeq) beta-amyrin 28-monooxygenase-like	--	[QI]	Secondary metabolites biosynthesis, transport and catabolism;; Lipid transport and metabolism	Cytochrome P450	Beta-amyrin 28-monooxygenase OS=Vitis vinifera OX=29760 GN=CYP716A15 PE=1 SV=1	Q	Secondary metabolites biosynthesis, transport and catabolism	beta-amyrin 28-monooxygenase-like [Juglans regia]
Cyclocarya_paliurus_newGene_23390	0	0	0	6481	5540	5066	0	0	0	82.0802	72.5459	76.9335	2.71466182756677e-07	7.10056726676634	up	--	--	Cellular Component: integral component of membrane (GO:0016021);;	--	--	--	--	Nodulin-like	--	S	Function unknown	uncharacterized protein LOC108999409 [Juglans regia]
Cyclocarya_paliurus_newGene_533	0	0	0	5299	5356	4456	0	0	0	36.1521	37.7844	36.4588	2.88557105207873e-07	7.08608605096999	up	--	--	Cellular Component: integral component of membrane (GO:0016021);;	K00895|1.4e-61|hbr:110656716|K00895 diphosphate-dependent phosphofructokinase [EC:2.7.1.90] | (RefSeq) LOW QUALITY PROTEIN: uncharacterized protein LOC110656716	Glycolysis / Gluconeogenesis (ko00010);; Pentose phosphate pathway (ko00030);; Fructose and mannose metabolism (ko00051)	[R]	General function prediction only	Domain of unknown function	--	S	Function unknown	uncharacterized protein LOC108992705 [Juglans regia]
Cyclocarya_paliurus_newGene_35052	0	0	0	5800	4088	4957	0	0	0	81.2725	59.23	83.2905	3.18735079661384e-07	7.06479090335042	up	[G]	Carbohydrate transport and metabolism	Molecular Function: triose-phosphate isomerase activity (GO:0004807);; Biological Process: glycolytic process (GO:0006096);;	K01803|1.3e-137|jre:108986375|K01803 triosephosphate isomerase (TIM) [EC:5.3.1.1] | (RefSeq) triosephosphate isomerase, cytosolic	Glycolysis / Gluconeogenesis (ko00010);; Fructose and mannose metabolism (ko00051);; Inositol phosphate metabolism (ko00562);; Carbon fixation in photosynthetic organisms (ko00710);; Carbon metabolism (ko01200);; Biosynthesis of amino acids (ko01230)	[G]	Carbohydrate transport and metabolism	Triosephosphate isomerase	Triosephosphate isomerase, cytosolic OS=Petunia hybrida OX=4102 GN=TPIP1 PE=2 SV=1	G	Carbohydrate transport and metabolism	triosephosphate isomerase, cytosolic [Juglans regia]
Cyclocarya_paliurus_newGene_10801	0	0	0	4928	4167	4461	0	0	0	29.4563	25.7529	31.9672	3.17634273237587e-07	7.06427314920257	up	[R]	General function prediction only	Cellular Component: integral component of membrane (GO:0016021);;	K13606|1.9e-284|jre:109018516|K13606 chlorophyll(ide) b reductase [EC:1.1.1.294] | (RefSeq) probable chlorophyll(ide) b reductase NYC1, chloroplastic	Porphyrin and chlorophyll metabolism (ko00860)	[R]	General function prediction only	short chain dehydrogenase	Probable chlorophyll(ide) b reductase NYC1, chloroplastic OS=Oryza sativa subsp. japonica OX=39947 GN=NYC1 PE=1 SV=1	Q	Secondary metabolites biosynthesis, transport and catabolism	probable chlorophyll(ide) b reductase NYC1, chloroplastic [Juglans regia]
Cyclocarya_paliurus_newGene_25288	0	0	0	5309	3730	4027	0	0	0	51.4531	37.375	46.8061	3.377122920129e-07	7.05061722243353	up	[O]	Posttranslational modification, protein turnover, chaperones	Biological Process: response to acid chemical (GO:0001101);; Molecular Function: molecular_function (GO:0003674);; Molecular Function: catalytic activity (GO:0003824);; Molecular Function: thioredoxin-disulfide reductase activity (GO:0004791);; Cellular Component: cellular_component (GO:0005575);; Cellular Component: intracellular (GO:0005622);; Cellular Component: cell (GO:0005623);; Cellular Co…	K03671|2.7e-09|ppp:112284546|K03671 thioredoxin 1 | (RefSeq) thioredoxin H-type-like isoform X1	--	[O]	Posttranslational modification, protein turnover, chaperones	Thioredoxin	Thioredoxin-like protein CDSP32, chloroplastic OS=Arabidopsis thaliana OX=3702 GN=CDSP32 PE=1 SV=1	O	Posttranslational modification, protein turnover, chaperones	thioredoxin-like protein CDSP32, chloroplastic [Juglans regia]
Cyclocarya_paliurus_newGene_14598	0	0	0	4812	4016	3331	0	0	0	36.6605	31.6354	30.4305	3.40062633937805e-07	7.04795231893722	up	--	--	Molecular Function: DNA binding (GO:0003677);; Molecular Function: transcription factor activity, sequence-specific DNA binding (GO:0003700);; Cellular Component: nucleus (GO:0005634);;	K09286|1.4e-109|jre:108986643|K09286 EREBP-like factor | (RefSeq) ethylene-responsive transcription factor 4-like	--	--	--	AP2 domain	Ethylene-responsive transcription factor 4 OS=Nicotiana sylvestris OX=4096 GN=ERF4 PE=2 SV=1	K	Transcription	ethylene-responsive transcription factor 4-like [Juglans regia]
Cyclocarya_paliurus_newGene_28107	0	0	0	4068	3543	3657	0	0	0	55.6796	50.1508	61.7652	3.56884830634584e-07	7.03657964936062	up	[G]	Carbohydrate transport and metabolism	Molecular Function: hydrolase activity, hydrolyzing O-glycosyl compounds (GO:0004553);; Cellular Component: cell wall (GO:0005618);; Biological Process: xyloglucan metabolic process (GO:0010411);; Molecular Function: xyloglucan:xyloglucosyl transferase activity (GO:0016762);; Biological Process: cell wall biogenesis (GO:0042546);; Cellular Component: apoplast (GO:0048046);; Biological Process: ce…	K08235|1.4e-176|jre:108986843|K08235 xyloglucan:xyloglucosyl transferase [EC:2.4.1.207] | (RefSeq) probable xyloglucan endotransglucosylase/hydrolase protein 28	--	--	--	Glycosyl hydrolases family 16	Probable xyloglucan endotransglucosylase/hydrolase protein 28 OS=Arabidopsis thaliana OX=3702 GN=XTH28 PE=2 SV=1	G	Carbohydrate transport and metabolism	probable xyloglucan endotransglucosylase/hydrolase protein 28 [Juglans regia]
Cyclocarya_paliurus_newGene_27787	0	0	0	2683	3026	2440	0	0	0	45.1145	52.6265	49.2139	4.61671468473292e-07	6.97527805504948	up	[C]	Energy production and conversion	Molecular Function: pyruvate dehydrogenase (acetyl-transferring) activity (GO:0004739);; Biological Process: acetyl-CoA biosynthetic process from pyruvate (GO:0006086);; Cellular Component: intracellular membrane-bounded organelle (GO:0043231);;	K00161|4.3e-220|jre:108989818|K00161 pyruvate dehydrogenase E1 component alpha subunit [EC:1.2.4.1] | (RefSeq) pyruvate dehydrogenase E1 component subunit alpha-1, mitochondrial-like	Glycolysis / Gluconeogenesis (ko00010);; Citrate cycle (TCA cycle) (ko00020);; Pyruvate metabolism (ko00620);; Carbon metabolism (ko01200)	[C]	Energy production and conversion	Dehydrogenase E1 component	Pyruvate dehydrogenase E1 component subunit alpha-1, mitochondrial OS=Arabidopsis thaliana OX=3702 GN=E1 ALPHA PE=1 SV=2	C	Energy production and conversion	pyruvate dehydrogenase E1 component subunit alpha-1, mitochondrial-like [Juglans regia]
Cyclocarya_paliurus_newGene_6101	0	0	0	3119	2690	2213	0	0	0	25.3365	22.5952	21.5558	4.70643263460277e-07	6.97067772991684	up	--	--	Biological Process: vacuolar transport (GO:0007034);;	K12197|8.4e-103|jre:108998019|K12197 charged multivesicular body protein 1 | (RefSeq) ESCRT-related protein CHMP1B	Endocytosis (ko04144)	[U]	Intracellular trafficking, secretion, and vesicular transport	Snf7	ESCRT-related protein CHMP1B OS=Arabidopsis thaliana OX=3702 GN=CHMP1B PE=1 SV=1	U	Intracellular trafficking, secretion, and vesicular transport	ESCRT-related protein CHMP1B [Juglans regia]
Cyclocarya_paliurus_newGene_33499	0	0	0	2765	2408	2119	0	0	0	13.8097	12.4253	12.6962	5.09298281693471e-07	6.95161835398578	up	--	--	Molecular Function: phosphoric ester hydrolase activity (GO:0042578);;	K22913|3.7e-23|soe:110787223|K22913 phosphatidylinositol 3,5-bisphosphate 5-phosphatase [EC:3.1.3.-] | (RefSeq) phosphoinositide phosphatase SAC2-like	Inositol phosphate metabolism (ko00562)	[I]	Lipid transport and metabolism	SacI homology domain	Probable phosphoinositide phosphatase SAC9 OS=Arabidopsis thaliana OX=3702 GN=SAC9 PE=1 SV=1	I	Lipid transport and metabolism	probable phosphoinositide phosphatase SAC9 [Juglans regia]
Cyclocarya_paliurus_newGene_21069	0	0	0	2802	2234	2257	0	0	0	31.8498	23.5914	31.4086	5.17212960792767e-07	6.94837243610976	up	--	--	Molecular Function: DNA binding (GO:0003677);; Molecular Function: zinc ion binding (GO:0008270);;	--	--	[R]	General function prediction only	A20-like zinc finger	Zinc finger A20 and AN1 domain-containing stress-associated protein 5 OS=Arabidopsis thaliana OX=3702 GN=SAP5 PE=2 SV=1	S	Function unknown	zinc finger A20 and AN1 domain-containing stress-associated protein 5-like [Juglans regia]
Cyclocarya_paliurus_newGene_17688	0	0	0	2624	2455	2050	0	0	0	199.284	192.757	186.705	5.18084293076013e-07	6.94740121961973	up	--	--	Molecular Function: metal ion binding (GO:0046872);;	--	--	--	--	Metallothionein	Metallothionein-like protein type 2 OS=Actinidia deliciosa OX=3627 GN=pKIWI504 PE=2 SV=1	S	Function unknown	Metallothionein-like protein type 2 [Morella rubra]
Cyclocarya_paliurus_newGene_20114	0	0	0	2154	3450	2544	0	0	0	61.5581	95.7014	82.3295	5.28066811205626e-07	6.94642742931604	up	[R]	General function prediction only	--	K23050|5.3e-157|jre:108991260|K23050 phenylcoumaran benzylic ether reductase [EC:1.3.1.-] | (RefSeq) phenylcoumaran benzylic ether reductase Betv6-like	--	--	--	NmrA-like family	Phenylcoumaran benzylic ether reductase Betv6 OS=Betula pendula OX=3505 GN=BETV6 PE=1 SV=1	S	Function unknown	phenylcoumaran benzylic ether reductase Betv6-like [Juglans regia]
Cyclocarya_paliurus_newGene_15446	0	0	0	2370	2229	1925	0	0	0	47.4929	46.1796	46.2521	5.64549362360443e-07	6.92675354061797	up	--	--	Molecular Function: calcium ion binding (GO:0005509);;	K13448|9.9e-75|jre:108983002|K13448 calcium-binding protein CML | (RefSeq) probable calcium-binding protein CML44	Plant-pathogen interaction (ko04626)	[T]	Signal transduction mechanisms	EF hand	Probable calcium-binding protein CML44 OS=Arabidopsis thaliana OX=3702 GN=CML44 PE=2 SV=2	T	Signal transduction mechanisms	probable calcium-binding protein CML44 [Juglans regia]
Cyclocarya_paliurus_newGene_33628	0	0	0	2439	1908	2363	0	0	0	52.4479	42.4064	60.9172	5.87672243486606e-07	6.91901218176612	up	[J]	Translation, ribosomal structure and biogenesis	Molecular Function: RNA binding (GO:0003723);;	K11294|2.3e-45|ppp:112289952|K11294 nucleolin | (RefSeq) 31 kDa ribonucleoprotein, chloroplastic-like	--	[R]	General function prediction only	RNA recognition motif. (a.k.a. RRM, RBD, or RNP domain)	RNA-binding protein CP29B, chloroplastic OS=Arabidopsis thaliana OX=3702 GN=CP29B PE=1 SV=1	A	RNA processing and modification	28 kDa ribonucleoprotein, chloroplastic-like [Juglans regia]
Cyclocarya_paliurus_newGene_3762	0	0	0	2183	4195	1939	0	0	0	38.2229	75.9756	40.7203	6.36885653631897e-07	6.9058746039048	up	--	--	Molecular Function: transferase activity, transferring acyl groups other than amino-acyl groups (GO:0016747);;	K13065|6.7e-238|jre:108979963|K13065 shikimate O-hydroxycinnamoyltransferase [EC:2.3.1.133] | (RefSeq) stemmadenine O-acetyltransferase-like	Phenylpropanoid biosynthesis (ko00940);; Flavonoid biosynthesis (ko00941);; Stilbenoid, diarylheptanoid and gingerol biosynthesis (ko00945)	--	--	Transferase family	Stemmadenine O-acetyltransferase OS=Catharanthus roseus OX=4058 GN=SAT PE=1 SV=1	S	Function unknown	stemmadenine O-acetyltransferase-like [Juglans regia]
Cyclocarya_paliurus_newGene_13994	0	0	0	1983	2226	1505	0	0	0	29.2359	33.9326	26.6065	6.7289442002869e-07	6.8851442373032	up	[QV]	Secondary metabolites biosynthesis, transport and catabolism;; Defense mechanisms	Molecular Function: monooxygenase activity (GO:0004497);; Molecular Function: iron ion binding (GO:0005506);; Molecular Function: oxidoreductase activity, acting on paired donors, with incorporation or reduction of molecular oxygen (GO:0016705);; Molecular Function: heme binding (GO:0020037);;	K20562|1.8e-199|fve:101293618|K20562 biphenyl-4-hydroxylase | (RefSeq) cytochrome P450 CYP736A12-like	--	[Q]	Secondary metabolites biosynthesis, transport and catabolism	Cytochrome P450	Cytochrome P450 71AU50 OS=Prunus mume OX=102107 GN=CYP71AU50 PE=2 SV=1	Q	Secondary metabolites biosynthesis, transport and catabolism	cytochrome P450 71AU50-like [Juglans regia]
Cyclocarya_paliurus_newGene_33789	0	0	0	1726	1838	1588	0	0	0	18.8235	20.7233	20.768	7.32793992376994e-07	6.86389700367893	up	[N]	Cell motility	Cellular Component: integral component of membrane (GO:0016021);; Molecular Function: cellulose synthase (UDP-forming) activity (GO:0016760);; Biological Process: cellulose biosynthetic process (GO:0030244);; Biological Process: cell wall organization (GO:0071555);;	K10999|2.8e-111|aly:9304049|K10999 cellulose synthase A [EC:2.4.1.12] | (RefSeq) cellulose synthase A catalytic subunit 8 [UDP-forming]	--	--	--	Cellulose synthase	Cellulose synthase-like protein G2 OS=Arabidopsis thaliana OX=3702 GN=CSLG2 PE=2 SV=1	G	Carbohydrate transport and metabolism	cellulose synthase-like protein G2 [Juglans regia]
Cyclocarya_paliurus_newGene_12396	0	0	0	1622	1615	1426	0	0	0	56.1837	57.818	59.1997	8.20742667889466e-07	6.83615460239038	up	[K]	Transcription	Cellular Component: DNA-directed RNA polymerase IV complex (GO:0000418);; Cellular Component: DNA-directed RNA polymerase V complex (GO:0000419);; Cellular Component: DNA-directed RNA polymerase complex (GO:0000428);; Molecular Function: molecular_function (GO:0003674);; Molecular Function: DNA binding (GO:0003677);; Molecular Function: catalytic activity (GO:0003824);; Molecular Function: DNA-di…	K03014|9.8e-66|hbr:110658411|K03014 DNA-directed RNA polymerases I, II, and III subunit RPABC2 | (RefSeq) DNA-directed RNA polymerases II, IV and V subunit 6A	RNA polymerase (ko03020)	[K]	Transcription	RNA polymerase Rpb6	DNA-directed RNA polymerases II, IV and V subunit 6A OS=Arabidopsis thaliana OX=3702 GN=NRPB6A PE=1 SV=1	K	Transcription	DNA-directed RNA polymerases II, IV and V subunit 6A-like [Juglans regia]
Cyclocarya_paliurus_newGene_4160	2	0	0	1785	3811	1642	0.03973	0	0	61.7403	136.331	68.0922	7.21900656999006e-07	6.8340735738074	up	--	--	Biological Process: defense response (GO:0006952);;	--	--	--	--	Pathogenesis-related protein Bet v 1 family	MLP-like protein 43 OS=Arabidopsis thaliana OX=3702 GN=MLP43 PE=1 SV=1	S	Function unknown	MLP-like protein 43 isoform X2 [Juglans regia]
Cyclocarya_paliurus_newGene_38026	0	0	0	1697	1459	1368	0	0	0	14.1935	12.612	13.7207	8.57875716983514e-07	6.82548985906917	up	[T]	Signal transduction mechanisms	Molecular Function: protein kinase activity (GO:0004672);; Molecular Function: ATP binding (GO:0005524);; Cellular Component: integral component of membrane (GO:0016021);;	K13435|9.8e-95|spen:107018783|K13435 serine/threonine-protein kinase Pto | (RefSeq) receptor-like protein kinase HERK 1 isoform X2	Plant-pathogen interaction (ko04626)	[T]	Signal transduction mechanisms	Protein tyrosine and serine/threonine kinase	Receptor-like protein kinase FERONIA OS=Arabidopsis thaliana OX=3702 GN=FER PE=1 SV=1	T	Signal transduction mechanisms	receptor-like protein kinase FERONIA [Juglans regia]
Cyclocarya_paliurus_newGene_17511	0	0	0	1694	1513	1283	0	0	0	16.3243	15.0791	14.8285	8.66009619107798e-07	6.82309402809773	up	--	--	Cellular Component: integral component of membrane (GO:0016021);;	--	--	--	--	--	--	--	--	hypothetical protein glysoja_021097 [Glycine soja]
Cyclocarya_paliurus_newGene_2685	0	0	0	2232	952	1486	0	0	0	20.6245	8.17955	15.26	1.15142420328918e-06	6.7615907235133	up	[S]	Function unknown	Cellular Component: integral component of membrane (GO:0016021);;	K19589|2.3e-24|zma:100283871|K19589 release factor glutamine methyltransferase [EC:2.1.1.297] | (RefSeq) uncharacterized protein LOC100283871	--	--	--	Uncharacterized integral membrane protein (DUF2301)	--	S	Function unknown	uncharacterized protein LOC108997398 [Juglans regia]
Cyclocarya_paliurus_newGene_3786	0	0	0	1094	1555	954	0	0	0	15.4461	22.7108	16.1565	1.25240303778097e-06	6.73439452996967	up	[QV]	Secondary metabolites biosynthesis, transport and catabolism;; Defense mechanisms	Molecular Function: monooxygenase activity (GO:0004497);; Molecular Function: iron ion binding (GO:0005506);; Cellular Component: integral component of membrane (GO:0016021);; Molecular Function: oxidoreductase activity, acting on paired donors, with incorporation or reduction of molecular oxygen (GO:0016705);; Molecular Function: heme binding (GO:0020037);;	K20617|6.1e-299|jre:108985324|K20617 cytochrome P450 family 71 subfamily A | (RefSeq) tryptamine 5-hydroxylase-like	--	[Q]	Secondary metabolites biosynthesis, transport and catabolism	Cytochrome P450	Tryptamine 5-hydroxylase OS=Oryza sativa subsp. japonica OX=39947 GN=CYP71P1 PE=1 SV=1	Q	Secondary metabolites biosynthesis, transport and catabolism	tryptamine 5-hydroxylase-like [Juglans regia]
Cyclocarya_paliurus_newGene_3907	0	0	0	1225	1190	932	0	0	0	9.35945	9.39832	8.53862	1.27613567482244e-06	6.72750255942021	up	[J]	Translation, ribosomal structure and biogenesis	Molecular Function: structural constituent of ribosome (GO:0003735);; Biological Process: translation (GO:0006412);; Cellular Component: large ribosomal subunit (GO:0015934);;	K02900|1.8e-67|jre:108989749|K02900 large subunit ribosomal protein L27Ae | (RefSeq) 60S ribosomal protein L27a-3	Ribosome (ko03010)	[J]	Translation, ribosomal structure and biogenesis	Ribosomal proteins 50S-L15, 50S-L18e, 60S-L27A	60S ribosomal protein L27a-3 OS=Arabidopsis thaliana OX=3702 GN=RPL27AC PE=2 SV=2	J	Translation, ribosomal structure and biogenesis	60S ribosomal protein L27a-3 [Juglans regia]
Cyclocarya_paliurus_newGene_15360	0	0	0	1033	1084	1102	0	0	0	6.18865	6.66679	7.82536	1.3648620514395e-06	6.71158635281345	up	--	--	Molecular Function: nucleic acid binding (GO:0003676);; Molecular Function: aspartic-type endopeptidase activity (GO:0004190);; Biological Process: DNA integration (GO:0015074);;	K19199|1.1e-107|jre:108998805|K19199 protein-histidine N-methyltransferase [EC:2.1.1.85] | (RefSeq) uncharacterized protein LOC108998805 isoform X1	--	[R]	General function prediction only	Reverse transcriptase (RNA-dependent DNA polymerase)	Uncharacterized mitochondrial protein AtMg00860 OS=Arabidopsis thaliana OX=3702 GN=AtMg00860 PE=4 SV=1	I	Lipid transport and metabolism	Transposon Tf2-12 polyprotein [Vitis vinifera]
Cyclocarya_paliurus_newGene_22518	0	0	0	998	1424	921	0	0	0	22.6319	33.3992	25.0576	1.37271121103286e-06	6.71136165977309	up	[Q]	Secondary metabolites biosynthesis, transport and catabolism	Molecular Function: metal ion binding (GO:0046872);; Molecular Function: dioxygenase activity (GO:0051213);;	K23947|7.7e-23|egr:104422877|K23947 2-oxoglutarate-dependent dioxygenase [EC:1.14.11.-] | (RefSeq) 2-oxoglutarate-dependent dioxygenase DAO	Tryptophan metabolism (ko00380)	[QR]	Secondary metabolites biosynthesis, transport and catabolism;; General function prediction only	2OG-Fe(II) oxygenase superfamily	Probable 2-oxoglutarate-dependent dioxygenase AOP1 (Fragment) OS=Arabidopsis thaliana OX=3702 GN=AOP1 PE=2 SV=1	C	Energy production and conversion	hypothetical protein F2P56_027533 [Juglans regia]
Cyclocarya_paliurus_newGene_30427	0	0	0	1045	1225	925	0	0	0	10.285	12.4648	10.9105	1.3756094374808e-06	6.70920518938147	up	[E]	Amino acid transport and metabolism	Molecular Function: catalytic activity (GO:0003824);;	K15631|3.4e-30|ppp:112292332|K15631 molybdenum cofactor sulfurtransferase [EC:2.8.1.9] | (RefSeq) molybdenum cofactor sulfurase-like isoform X1	Folate biosynthesis (ko00790)	[H]	Coenzyme transport and metabolism	--	Molybdenum cofactor sulfurase OS=Oryza sativa subsp. japonica OX=39947 GN=MCSU3 PE=2 SV=2	H	Coenzyme transport and metabolism	uncharacterized protein LOC108990829 [Juglans regia]
Cyclocarya_paliurus_newGene_20709	0	0	0	872	1407	1045	0	0	0	5.47092	7.65171	6.77221	1.43916772321764e-06	6.70092335775782	up	--	--	Biological Process: cellular response to phosphate starvation (GO:0016036);;	--	--	[P]	Inorganic ion transport and metabolism	SPX domain	SPX domain-containing protein 3 OS=Arabidopsis thaliana OX=3702 GN=SPX3 PE=2 SV=1	P	Inorganic ion transport and metabolism	SPX domain-containing protein 3-like [Juglans regia]
Cyclocarya_paliurus_newGene_36321	0	0	0	1067	1286	825	0	0	0	13.0589	16.2699	12.1069	1.43102101419704e-06	6.70002526793739	up	[G]	Carbohydrate transport and metabolism	Cellular Component: integral component of membrane (GO:0016021);; Molecular Function: transmembrane transporter activity (GO:0022857);;	K08176|1.5e-116|jre:109022240|K08176 MFS transporter, PHS family, inorganic phosphate transporter | (RefSeq) probable inorganic phosphate transporter 1-8 isoform X3	--	[P]	Inorganic ion transport and metabolism	Sugar (and other) transporter	Probable inorganic phosphate transporter 1-8 OS=Arabidopsis thaliana OX=3702 GN=PHT1-8 PE=2 SV=2	P	Inorganic ion transport and metabolism	probable inorganic phosphate transporter 1-8 isoform X3 [Juglans regia]
Cyclocarya_paliurus_newGene_20664	0	0	0	1246	996	855	0	0	0	17.8903	14.7795	14.7171	1.4533098169526e-06	6.69559257659127	up	--	--	--	--	--	--	--	--	--	--	--	hypothetical protein Lal_00024320 [Lupinus albus]
Cyclocarya_paliurus_newGene_12564	0	0	0	1201	810	1093	0	0	0	15.8541	11.0553	17.3041	1.54321830185501e-06	6.68284192794798	up	--	--	Molecular Function: DNA binding (GO:0003677);; Cellular Component: nucleus (GO:0005634);; Biological Process: regulation of transcription, DNA-templated (GO:0006355);;	K16222|9.8e-60|csat:104726841|K16222 Dof zinc finger protein DOF5.5 | (RefSeq) cyclic dof factor 1-like	Circadian rhythm - plant (ko04712)	--	--	Dof domain, zinc finger	Cyclic dof factor 2 OS=Arabidopsis thaliana OX=3702 GN=CDF2 PE=1 SV=2	K	Transcription	cyclic dof factor 2-like [Juglans regia]
Cyclocarya_paliurus_newGene_19083	0	0	0	1613	804	925	0	0	0	6.19123	3.18959	4.25565	1.57346171375752e-06	6.68070307977008	up	--	--	Molecular Function: nucleic acid binding (GO:0003676);; Molecular Function: RNA-DNA hybrid ribonuclease activity (GO:0004523);; Molecular Function: zinc ion binding (GO:0008270);; Cellular Component: integral component of membrane (GO:0016021);;	K22804|1.8e-110|bna:106442438|K22804 structural maintenance of chromosomes protein 6 | (RefSeq) structural maintenance of chromosomes protein 6B-like	--	[R]	General function prediction only	Reverse transcriptase (RNA-dependent DNA polymerase)	Uncharacterized mitochondrial protein AtMg01250 OS=Arabidopsis thaliana OX=3702 GN=AtMg01250 PE=4 SV=1	L	Replication, recombination and repair	uncharacterized protein LOC118349652 [Juglans regia]
Cyclocarya_paliurus_newGene_27705	0	0	0	1223	1588	649	0	0	0	4.62136	6.25426	2.9487	1.58822017445825e-06	6.67948086057651	up	--	--	Cellular Component: ubiquitin ligase complex (GO:0000151);; Molecular Function: molecular_function (GO:0003674);; Molecular Function: binding (GO:0005488);; Molecular Function: protein binding (GO:0005515);; Cellular Component: cellular_component (GO:0005575);; Cellular Component: intracellular (GO:0005622);; Cellular Component: cell (GO:0005623);; Cellular Component: nucleus (GO:0005634);; Cellu…	K01213|6.7e-09|ini:109147380|K01213 galacturan 1,4-alpha-galacturonidase [EC:3.2.1.67] | (RefSeq) exopolygalacturonase-like	Pentose and glucuronate interconversions (ko00040)	[R]	General function prediction only	Kelch motif	F-box/kelch-repeat protein SKIP11 OS=Arabidopsis thaliana OX=3702 GN=SKIP11 PE=1 SV=2	S	Function unknown	F-box/kelch-repeat protein SKIP11-like [Juglans regia]
Cyclocarya_paliurus_newGene_1398	0	0	0	1049	1047	777	0	0	0	8.62878	8.89985	7.68081	1.60119549386389e-06	6.67098703263254	up	--	--	Molecular Function: molecular_function (GO:0003674);; Molecular Function: catalytic activity (GO:0003824);; Molecular Function: ubiquitin-protein transferase activity (GO:0004842);; Molecular Function: binding (GO:0005488);; Molecular Function: protein binding (GO:0005515);; Cellular Component: cellular_component (GO:0005575);; Cellular Component: intracellular (GO:0005622);; Cellular Component: …	K10666|1.5e-228|jre:109011943|K10666 E3 ubiquitin-protein ligase RNF5 [EC:2.3.2.27] | (RefSeq) uncharacterized protein LOC109011943	Protein processing in endoplasmic reticulum (ko04141)	[O]	Posttranslational modification, protein turnover, chaperones	Zinc finger, C3HC4 type (RING finger)	E3 ubiquitin-protein ligase RMA3 OS=Arabidopsis thaliana OX=3702 GN=RMA3 PE=1 SV=1	O	Posttranslational modification, protein turnover, chaperones	uncharacterized protein LOC109011943 [Juglans regia]
Cyclocarya_paliurus_newGene_34704	1	0	0	872	716	770	0.003675	0	0	10.1869	8.79081	10.8242	1.26169649576957e-06	6.66039361833351	up	[CR]	Energy production and conversion;; General function prediction only	Molecular Function: oxidoreductase activity (GO:0016491);;	K18980|1.0e-132|jre:109006930|K18980 2-methylene-furan-3-one reductase [EC:1.3.1.105] | (RefSeq) 2-methylene-furan-3-one reductase-like	--	[CR]	Energy production and conversion;; General function prediction only	Zinc-binding dehydrogenase	2-methylene-furan-3-one reductase OS=Solanum lycopersicum OX=4081 GN=EO PE=1 SV=1	C	Energy production and conversion	hypothetical protein FH972_001692 [Carpinus fangiana]
Cyclocarya_paliurus_newGene_4601	0	0	0	1282	889	640	0	0	0	24.052	17.2547	14.3972	1.87209412816777e-06	6.63469719381035	up	[GER]	Carbohydrate transport and metabolism;; Amino acid transport and metabolism;; General function prediction only	Cellular Component: integral component of membrane (GO:0016021);; Molecular Function: transmembrane transporter activity (GO:0022857);;	K17500|5.5e-53|nto:104085001|K17500 integrin-linked kinase-associated serine/threonine phosphatase 2C [EC:3.1.3.16] | (RefSeq) WAT1-related protein At3g18200 isoform X1	--	--	--	EamA-like transporter family	WAT1-related protein At4g08300 OS=Arabidopsis thaliana OX=3702 GN=At4g08300 PE=2 SV=1	S	Function unknown	WAT1-related protein At4g08300-like [Juglans regia]
Cyclocarya_paliurus_newGene_19995	0	0	0	4998	720	3648	0	0	0	60.4289	8.9897	52.8886	2.56946750526721e-06	6.59122180841344	up	--	--	Molecular Function: ubiquitin protein ligase activity (GO:0061630);;	K11982|2.9e-117|pvu:PHAVU_001G233700g|K11982 E3 ubiquitin-protein ligase RNF115/126 [EC:2.3.2.27] | (RefSeq) hypothetical protein	--	[O]	Posttranslational modification, protein turnover, chaperones	Protein of unknown function (DUF1117)	E3 ubiquitin-protein ligase RDUF2 OS=Arabidopsis thaliana OX=3702 GN=DURF2 PE=1 SV=1	O	Posttranslational modification, protein turnover, chaperones	E3 ubiquitin-protein ligase RDUF2-like [Juglans regia]
Cyclocarya_paliurus_newGene_4820	0	0	0	794	745	647	0	0	0	7.81883	7.60284	7.25245	2.40674884374256e-06	6.56758105151348	up	--	--	Molecular Function: protein binding (GO:0005515);;	K11374|0.0e+00|jre:109013148|K11374 elongator complex protein 2 | (RefSeq) elongator complex protein 2-like	--	[BK]	Chromatin structure and dynamics;; Transcription	WD domain, G-beta repeat	Elongator complex protein 2 OS=Arabidopsis thaliana OX=3702 GN=ELP2 PE=1 SV=1	--	--	elongator complex protein 2-like [Juglans regia]
Cyclocarya_paliurus_newGene_16979	1	0	0	838	518	576	0.011428	0	0	41.8377	26.4912	34.3585	2.10572510235986e-06	6.53178738394757	up	--	--	Molecular Function: endonuclease activity (GO:0004519);; Biological Process: rRNA processing (GO:0006364);; Cellular Component: Las1 complex (GO:0090730);;	K16912|1.2e-46|jre:109017998|K16912 ribosomal biogenesis protein LAS1 | (RefSeq) uncharacterized protein LOC109017998 isoform X1	--	--	--	--	--	S	Function unknown	hypothetical protein F2P56_011564 [Juglans regia]
Cyclocarya_paliurus_newGene_37871	0	0	0	741	536	615	0	0	0	13.4726	10.7626	14.3288	3.17002643352091e-06	6.49813964748075	up	[C]	Energy production and conversion	Molecular Function: iron ion binding (GO:0005506);; Cellular Component: integral component of membrane (GO:0016021);;	--	--	--	--	Rubredoxin	--	C	Energy production and conversion	rubredoxin-like [Juglans regia]
Cyclocarya_paliurus_newGene_8065	0	0	0	717	734	459	0	0	0	3.84539	6.36073	4.45454	3.18474932684568e-06	6.49686957974832	up	[QV]	Secondary metabolites biosynthesis, transport and catabolism;; Defense mechanisms	Molecular Function: monooxygenase activity (GO:0004497);; Molecular Function: iron ion binding (GO:0005506);; Cellular Component: integral component of membrane (GO:0016021);; Molecular Function: oxidoreductase activity, acting on paired donors, with incorporation or reduction of molecular oxygen (GO:0016705);; Molecular Function: heme binding (GO:0020037);;	K23806|1.2e-185|vvi:100246293|K23806 alpha-guaiene 2-oxidase | (RefSeq) premnaspirodiene oxygenase-like	--	[Q]	Secondary metabolites biosynthesis, transport and catabolism	Cytochrome P450	Cytochrome P450 71D9 OS=Glycine max OX=3847 GN=CYP71D9 PE=2 SV=1	Q	Secondary metabolites biosynthesis, transport and catabolism	cytochrome P450 71D9-like [Juglans regia]
Cyclocarya_paliurus_newGene_16356	0	0	0	493	1020	499	0	0	0	7.31994	15.9576	8.91184	3.59087871768102e-06	6.4721171029635	up	[QV]	Secondary metabolites biosynthesis, transport and catabolism;; Defense mechanisms	Molecular Function: monooxygenase activity (GO:0004497);; Molecular Function: iron ion binding (GO:0005506);; Cellular Component: integral component of membrane (GO:0016021);; Molecular Function: oxidoreductase activity, acting on paired donors, with incorporation or reduction of molecular oxygen (GO:0016705);; Molecular Function: heme binding (GO:0020037);;	K20770|2.6e-93|gab:108483715|K20770 (+)-delta-cadinene 8-hydroxylase [EC:1.14.-.-] | (RefSeq) flavonoid 3'-monooxygenase-like	--	[Q]	Secondary metabolites biosynthesis, transport and catabolism	Cytochrome P450	Flavonoid 3'-monooxygenase CYP75B137 OS=Crocosmia x crocosmiiflora OX=1053288 GN=CYP75B137 PE=1 SV=1	Q	Secondary metabolites biosynthesis, transport and catabolism	flavonoid 3'-monooxygenase CYP75B137-like isoform X1 [Juglans regia]
Cyclocarya_paliurus_newGene_34003	0	0	0	592	679	485	0	0	0	2.71447	3.21629	2.66295	3.53590152551485e-06	6.46899044615577	up	--	--	Molecular Function: molecular_function (GO:0003674);; Molecular Function: catalytic activity (GO:0003824);; Molecular Function: ubiquitin-protein transferase activity (GO:0004842);; Molecular Function: protein binding (GO:0005515);; Biological Process: cellular protein modification process (GO:0006464);; Biological Process: nitrogen compound metabolic process (GO:0006807);; Biological Process: bi…	K10268|9.2e-149|gmx:100779319|K10268 F-box and leucine-rich repeat protein 2/20 | (RefSeq) F-box protein SKIP2	--	[R]	General function prediction only	Leucine Rich repeat	F-box protein At1g47056 OS=Arabidopsis thaliana OX=3702 GN=At1g47056 PE=2 SV=1	G	Carbohydrate transport and metabolism	F-box protein At1g47056-like [Juglans regia]
Cyclocarya_paliurus_newGene_1668	1	0	0	638	393	711	2e-06	0	0	3.45037	2.13459	5.25552	2.89318867371746e-06	6.4553720151562	up	--	--	Biological Process: regulation of phosphoprotein phosphatase activity (GO:0043666);;	K17607|2.3e-162|jre:108996357|K17607 type 2A phosphatase activator TIP41 | (RefSeq) TIP41-like protein	--	[S]	Function unknown	TIP41-like family	TIP41-like protein OS=Arabidopsis thaliana OX=3702 GN=TIP41L PE=2 SV=1	S	Function unknown	TIP41-like protein [Juglans regia]
Cyclocarya_paliurus_newGene_16861	0	0	0	564	522	597	0	0	0	12.2343	12.5686	16.7455	3.80927198040204e-06	6.45035597853888	up	--	--	Biological Process: signal transduction (GO:0007165);; Molecular Function: ADP binding (GO:0043531);;	--	--	--	--	Leucine Rich repeats (2 copies)	--	T	Signal transduction mechanisms	disease resistance protein RPV1 isoform X4 [Juglans regia]
Cyclocarya_paliurus_newGene_38319	0	0	0	704	500	476	0	0	0	14.5473	10.6903	11.8085	3.90938029174103e-06	6.44351671796258	up	[Q]	Secondary metabolites biosynthesis, transport and catabolism	Molecular Function: oxidoreductase activity (GO:0016491);;	K00002|1.3e-158|jre:109010014|K00002 alcohol dehydrogenase (NADP+) [EC:1.1.1.2] | (RefSeq) NADPH-dependent aldo-keto reductase, chloroplastic-like	Glycolysis / Gluconeogenesis (ko00010);; Pentose and glucuronate interconversions (ko00040);; Glycerolipid metabolism (ko00561)	[R]	General function prediction only	Aldo/keto reductase family	NADPH-dependent aldo-keto reductase, chloroplastic OS=Arabidopsis thaliana OX=3702 GN=AKR4C9 PE=1 SV=1	L	Replication, recombination and repair	hypothetical protein F2P56_007866, partial [Juglans regia]
Cyclocarya_paliurus_newGene_341	0	0	0	574	563	445	0	0	0	23.2521	23.5439	21.5831	4.18088793919636e-06	6.42488038014078	up	--	--	Molecular Function: aspartic-type endopeptidase activity (GO:0004190);;	K22683|1.9e-21|bna:106353296|K22683 aspartyl protease family protein [EC:3.4.23.-] | (RefSeq) aspartyl protease family protein 2 isoform X1	--	[O]	Posttranslational modification, protein turnover, chaperones	Xylanase inhibitor N-terminal	Aspartyl protease AED1 OS=Arabidopsis thaliana OX=3702 GN=AED1 PE=2 SV=1	O	Posttranslational modification, protein turnover, chaperones	aspartyl protease family protein At5g10770-like [Juglans regia]
Cyclocarya_paliurus_newGene_3093	0	0	0	509	523	523	0	0	0	6.51601	6.94948	8.04462	4.30715482126191e-06	6.41764112282508	up	--	--	Molecular Function: DNA binding (GO:0003677);; Cellular Component: nucleus (GO:0005634);; Biological Process: regulation of transcription, DNA-templated (GO:0006355);;	K16222|3.5e-54|csat:104726841|K16222 Dof zinc finger protein DOF5.5 | (RefSeq) cyclic dof factor 1-like	Circadian rhythm - plant (ko04712)	--	--	Dof domain, zinc finger	Cyclic dof factor 2 OS=Arabidopsis thaliana OX=3702 GN=CDF2 PE=1 SV=2	K	Transcription	cyclic dof factor 2-like [Juglans regia]
Cyclocarya_paliurus_newGene_25924	0	0	0	534	637	384	0	0	0	9.07585	11.2101	7.8327	4.54186162004986e-06	6.40452683988179	up	--	--	--	--	--	--	--	Cotton fibre expressed protein	--	S	Function unknown	hypothetical protein F2P56_025803, partial [Juglans regia]
Cyclocarya_paliurus_newGene_34640	0	0	0	539	434	476	0	0	0	5.93686	4.94464	6.29201	4.92798201953092e-06	6.38238544273351	up	[T]	Signal transduction mechanisms	Molecular Function: protein serine/threonine kinase activity (GO:0004674);; Molecular Function: ATP binding (GO:0005524);; Biological Process: signal transduction (GO:0007165);; Cellular Component: integral component of membrane (GO:0016021);;	K07198|3.2e-179|aly:9308209|K07198 5'-AMP-activated protein kinase, catalytic alpha subunit [EC:2.7.11.11] | (RefSeq) CBL-interacting serine/threonine-protein kinase 25	--	[T]	Signal transduction mechanisms	Protein kinase domain	CBL-interacting serine/threonine-protein kinase 25 OS=Arabidopsis thaliana OX=3702 GN=CIPK25 PE=2 SV=1	T	Signal transduction mechanisms	CBL-interacting serine/threonine-protein kinase 5-like [Juglans regia]
Cyclocarya_paliurus_newGene_16912	0	0	0	485	478	453	0	0	0	4.99118	4.96568	5.83477	5.05083998297769e-06	6.37533109178826	up	--	--	Molecular Function: transcription factor activity, sequence-specific DNA binding (GO:0003700);; Cellular Component: nucleus (GO:0005634);; Biological Process: response to gibberellin (GO:0009739);;	K14494|6.3e-61|bna:106426289|K14494 DELLA protein | (RefSeq) DELLA protein RGL1	Plant hormone signal transduction (ko04075)	--	--	GRAS domain family	Scarecrow-like protein 3 OS=Arabidopsis thaliana OX=3702 GN=SCL3 PE=1 SV=1	K	Transcription	scarecrow-like protein 3 [Juglans regia]
Cyclocarya_paliurus_newGene_16929	0	0	0	525	451	428	0	0	0	5.6525	5.04747	5.57314	5.15766482961828e-06	6.36977742715602	up	--	--	Molecular Function: transcription factor activity, sequence-specific DNA binding (GO:0003700);; Cellular Component: nucleus (GO:0005634);; Biological Process: response to gibberellin (GO:0009739);;	K14494|6.3e-61|bna:106426289|K14494 DELLA protein | (RefSeq) DELLA protein RGL1	Plant hormone signal transduction (ko04075)	--	--	GRAS domain family	Scarecrow-like protein 3 OS=Arabidopsis thaliana OX=3702 GN=SCL3 PE=1 SV=1	K	Transcription	scarecrow-like protein 3 [Juglans regia]
Cyclocarya_paliurus_newGene_38113	0	0	0	636	270	775	0	0	0	13.0468	5.71378	19.0633	6.00686491826577e-06	6.34467961297954	up	--	--	Molecular Function: ATP transmembrane transporter activity (GO:0005347);; Cellular Component: integral component of membrane (GO:0016021);;	K15113|8.5e-182|jre:108982304|K15113 solute carrier family 25 (mitochondrial iron transporter), member 28/37 | (RefSeq) mitoferrin-like	--	[C]	Energy production and conversion	Mitochondrial carrier protein	Probable S-adenosylmethionine carrier 2, chloroplastic OS=Arabidopsis thaliana OX=3702 GN=SAMC2 PE=2 SV=1	C	Energy production and conversion	hypothetical protein F2P56_008050, partial [Juglans regia]
Cyclocarya_paliurus_newGene_35258	0	0	0	487	508	346	0	0	0	10.3698	11.1897	8.81565	5.75134919564507e-06	6.34130188271524	up	[I]	Lipid transport and metabolism	Molecular Function: hydrolase activity (GO:0016787);;	K20506|2.4e-85|egu:105060863|K20506 tuliposide A-converting enzyme [EC:4.2.99.22] | (RefSeq) tuliposide A-converting enzyme 2, chloroplastic-like	--	[V]	Defense mechanisms	alpha/beta hydrolase fold	2-hydroxyisoflavanone dehydratase OS=Glycyrrhiza echinata OX=46348 GN=HIDM PE=1 SV=1	V	Defense mechanisms	hypothetical protein FH972_018523 [Carpinus fangiana]
Cyclocarya_paliurus_newGene_20205	0	0	0	447	434	403	0	0	0	14.3019	14.3673	15.458	6.02839036025534e-06	6.32832620742658	up	--	--	--	--	--	--	--	--	--	S	Function unknown	hypothetical protein F2P56_032296 [Juglans regia]
Cyclocarya_paliurus_newGene_35960	0	0	0	383	630	349	0	0	0	3.0039	5.18206	3.28349	6.149118629883e-06	6.32668473169653	up	[M]	Cell wall/membrane/envelope biogenesis	Molecular Function: protein tyrosine kinase activity (GO:0004713);; Molecular Function: ATP binding (GO:0005524);; Cellular Component: integral component of membrane (GO:0016021);;	K13415|5.0e-74|han:110929858|K13415 protein brassinosteroid insensitive 1 [EC:2.7.10.1 2.7.11.1] | (RefSeq) systemin receptor SR160-like	Plant hormone signal transduction (ko04075)	--	--	Leucine rich repeat	MDIS1-interacting receptor like kinase 2 OS=Arabidopsis thaliana OX=3702 GN=MIK2 PE=1 SV=3	T	Signal transduction mechanisms	MDIS1-interacting receptor like kinase 2-like [Juglans regia]
Cyclocarya_paliurus_newGene_7353	11	0	0	22742	22933	19378	0.109438	0	0	314.258	327.66	321.096	7.65873066345998e-06	6.31770076837007	up	[QV]	Secondary metabolites biosynthesis, transport and catabolism;; Defense mechanisms	Molecular Function: monooxygenase activity (GO:0004497);; Molecular Function: iron ion binding (GO:0005506);; Cellular Component: integral component of membrane (GO:0016021);; Molecular Function: oxidoreductase activity, acting on paired donors, with incorporation or reduction of molecular oxygen (GO:0016705);; Molecular Function: heme binding (GO:0020037);;	K20770|7.6e-148|gab:108483715|K20770 (+)-delta-cadinene 8-hydroxylase [EC:1.14.-.-] | (RefSeq) flavonoid 3'-monooxygenase-like	--	[Q]	Secondary metabolites biosynthesis, transport and catabolism	Cytochrome P450	Flavonoid 3'-monooxygenase CYP75B137 OS=Crocosmia x crocosmiiflora OX=1053288 GN=CYP75B137 PE=1 SV=1	Q	Secondary metabolites biosynthesis, transport and catabolism	flavonoid 3'-monooxygenase CYP75B137-like isoform X1 [Juglans regia]
Cyclocarya_paliurus_newGene_9232	0	0	0	531	409	341	0	0	0	4.4073	3.50937	3.41298	6.3132745664094e-06	6.31677393571781	up	[R]	General function prediction only	Molecular Function: protein kinase activity (GO:0004672);; Molecular Function: ATP binding (GO:0005524);; Cellular Component: integral component of membrane (GO:0016021);;	K13418|8.2e-66|ppp:112278174|K13418 somatic embryogenesis receptor kinase 1 [EC:2.7.10.1 2.7.11.1] | (RefSeq) LRR receptor kinase BAK1-like	--	--	--	Protein kinase domain	Probable leucine-rich repeat receptor-like serine/threonine-protein kinase At3g14840 OS=Arabidopsis thaliana OX=3702 GN=LRR-RLK PE=1 SV=1	T	Signal transduction mechanisms	probable leucine-rich repeat receptor-like serine/threonine-protein kinase At3g14840 [Juglans regia]
Cyclocarya_paliurus_newGene_13412	0	0	0	2397	905	208	0	0	0	28.7539	11.2398	2.99381	8.18699411976989e-06	6.29189540233816	up	[G]	Carbohydrate transport and metabolism	Cellular Component: integral component of membrane (GO:0016021);; Molecular Function: transmembrane transporter activity (GO:0022857);;	K13783|1.8e-287|jre:108987396|K13783 MFS transporter, OPA family, solute carrier family 37 (glycerol-3-phosphate transporter), member 1/2 | (RefSeq) putative glycerol-3-phosphate transporter 1	--	[G]	Carbohydrate transport and metabolism	Major Facilitator Superfamily	Putative glycerol-3-phosphate transporter 1 OS=Arabidopsis thaliana OX=3702 GN=At3g47420 PE=2 SV=1	G	Carbohydrate transport and metabolism	putative glycerol-3-phosphate transporter 1 [Juglans regia]
Cyclocarya_paliurus_newGene_27493	0	0	0	285	560	344	0	0	0	7.84163	15.9471	11.4215	8.19113174985388e-06	6.25143232389646	up	--	--	Cellular Component: integral component of membrane (GO:0016021);;	K16282|1.1e-85|jre:108981879|K16282 E3 ubiquitin-protein ligase RHA2 [EC:2.3.2.27] | (RefSeq) RING-H2 finger protein ATL30-like	--	[O]	Posttranslational modification, protein turnover, chaperones	Ring finger domain	Probable E3 ubiquitin-protein ligase XERICO OS=Arabidopsis thaliana OX=3702 GN=XERICO PE=1 SV=1	O	Posttranslational modification, protein turnover, chaperones	RING-H2 finger protein ATL30-like [Juglans regia]
Cyclocarya_paliurus_newGene_15937	0	0	0	407	348	302	0	0	0	6.5536	5.79863	5.82098	8.7855443796424e-06	6.22722032905656	up	--	--	Molecular Function: calcium ion binding (GO:0005509);;	--	--	--	--	EF hand	--	S	Function unknown	hypothetical protein FH972_018537 [Carpinus fangiana]
Cyclocarya_paliurus_newGene_4103	0	0	0	254	536	312	0	0	0	4.55492	9.32652	6.5901	9.74243557790996e-06	6.20541235828415	up	[GI]	Carbohydrate transport and metabolism;; Lipid transport and metabolism	Molecular Function: enzyme inhibitor activity (GO:0004857);; Cellular Component: extracellular region (GO:0005576);; Cellular Component: cell wall (GO:0005618);; Molecular Function: pectinesterase activity (GO:0030599);; Biological Process: cell wall modification (GO:0042545);; Molecular Function: aspartyl esterase activity (GO:0045330);; Biological Process: pectin catabolic process (GO:0045490);;	K01051|1.7e-227|jre:109003962|K01051 pectinesterase [EC:3.1.1.11] | (RefSeq) pectinesterase-like	Pentose and glucuronate interconversions (ko00040)	--	--	Pectinesterase	Pectinesterase 2 OS=Citrus sinensis OX=2711 GN=PECS-2.1 PE=2 SV=1	G	Carbohydrate transport and metabolism	pectinesterase-like [Juglans regia]
Cyclocarya_paliurus_newGene_1656	4	0	0	1130	1522	957	0.214111	0	0	69.1523	97.0677	70.4726	9.09198003435881e-06	6.1770348329829	up	--	--	--	--	--	--	--	Peptidase of plants and bacteria	Basic secretory protease (Fragments) OS=Boswellia serrata OX=613112 PE=1 SV=1	S	Function unknown	uncharacterized protein LOC108996193 [Juglans regia]
Cyclocarya_paliurus_newGene_16168	0	0	0	326	334	281	0	0	0	5.78496	6.49259	5.97487	1.08582604897998e-05	6.16935045481735	up	[T]	Signal transduction mechanisms	--	--	--	--	--	Universal stress protein family	--	T	Signal transduction mechanisms	universal stress protein YxiE-like [Juglans regia]
Cyclocarya_paliurus_newGene_22449	0	0	0	335	329	267	0	0	0	5.47599	5.53241	5.23004	1.11321695651754e-05	6.16250702827388	up	[F]	Nucleotide transport and metabolism	Molecular Function: ATP binding (GO:0005524);; Biological Process: nicotinamide nucleotide metabolic process (GO:0046496);; Molecular Function: ATP-dependent NAD(P)H-hydrate dehydratase activity (GO:0047453);; Molecular Function: ADP-dependent NAD(P)H-hydrate dehydratase activity (GO:0052855);;	K17757|9.2e-212|jre:109005882|K17757 ATP-dependent NAD(P)H-hydrate dehydratase [EC:4.2.1.93] | (RefSeq) ATP-dependent (S)-NAD(P)H-hydrate dehydratase isoform X1	--	[G]	Carbohydrate transport and metabolism	Carbohydrate kinase	ATP-dependent (S)-NAD(P)H-hydrate dehydratase OS=Vitis vinifera OX=29760 GN=VIT_05s0020g02800 PE=3 SV=1	G	Carbohydrate transport and metabolism	hypothetical protein F2P56_027462, partial [Juglans regia]
Cyclocarya_paliurus_newGene_15434	5	0	0	1887	804	2126	0.089745	0	0	39.6316	25.9107	62.3456	1.31049962276884e-05	6.10422560869377	up	--	--	Molecular Function: UDP-glycosyltransferase activity (GO:0008194);;	K13496|3.8e-77|atr:18422858|K13496 UDP-glucosyltransferase 73C [EC:2.4.1.-] | (RefSeq) scopoletin glucosyltransferase	Zeatin biosynthesis (ko00908)	[GC]	Carbohydrate transport and metabolism;; Energy production and conversion	UDP-glucoronosyl and UDP-glucosyl transferase	UDP-glycosyltransferase 90A1 OS=Arabidopsis thaliana OX=3702 GN=UGT90A1 PE=2 SV=1	--	--	scopoletin glucosyltransferase-like [Juglans regia]
Cyclocarya_paliurus_newGene_38053	9	0	0	4068	3302	4176	0.06286	0	0	38.9433	33.6149	49.6132	1.48099097308432e-05	6.10013174135273	up	[T]	Signal transduction mechanisms	Molecular Function: protein kinase activity (GO:0004672);; Molecular Function: ATP binding (GO:0005524);;	K08867|0.0e+00|jre:108999446|K08867 WNK lysine deficient protein kinase [EC:2.7.11.1] | (RefSeq) probable serine/threonine-protein kinase WNK5 isoform X1	--	[R]	General function prediction only	Protein kinase domain	Probable serine/threonine-protein kinase WNK5 OS=Arabidopsis thaliana OX=3702 GN=WNK5 PE=1 SV=2	T	Signal transduction mechanisms	probable serine/threonine-protein kinase WNK5 isoform X1 [Juglans regia]
Cyclocarya_paliurus_newGene_35633	0	0	0	279	215	307	0	0	0	4.07076	3.23488	5.3412	1.56483231459818e-05	6.07106183960878	up	--	--	Molecular Function: DNA binding (GO:0003677);; Molecular Function: transcription factor activity, sequence-specific DNA binding (GO:0003700);; Cellular Component: nucleus (GO:0005634);;	K09286|2.4e-95|jre:108989128|K09286 EREBP-like factor | (RefSeq) dehydration-responsive element-binding protein 3-like	--	--	--	AP2 domain	Dehydration-responsive element-binding protein 3 OS=Arabidopsis thaliana OX=3702 GN=DREB3 PE=2 SV=1	K	Transcription	dehydration-responsive element-binding protein 3-like [Juglans regia]
Cyclocarya_paliurus_newGene_38193	0	0	0	225	295	265	0	0	0	3.2639	4.42894	4.61882	1.58628988179758e-05	6.06597369832537	up	[P]	Inorganic ion transport and metabolism	Cellular Component: vacuolar membrane (GO:0005774);; Molecular Function: calcium:proton antiporter activity (GO:0015369);; Cellular Component: integral component of membrane (GO:0016021);;	K07300|1.8e-238|jre:108994937|K07300 Ca2+:H+ antiporter | (RefSeq) vacuolar cation/proton exchanger 3-like	--	[P]	Inorganic ion transport and metabolism	Sodium/calcium exchanger protein	Vacuolar cation/proton exchanger 3 OS=Arabidopsis thaliana OX=3702 GN=CAX3 PE=1 SV=1	P	Inorganic ion transport and metabolism	vacuolar cation/proton exchanger 3-like [Juglans regia]
Cyclocarya_paliurus_newGene_18488	0	0	0	266	240	235	0	0	0	1.63245	1.52126	1.73294	1.73412234161292e-05	6.03974560344362	up	--	--	Molecular Function: nucleic acid binding (GO:0003676);; Biological Process: DNA integration (GO:0015074);;	K17545|4.8e-187|zma:103634684|K17545 serine/threonine-protein kinase ULK4 [EC:2.7.11.1] | (RefSeq) uncharacterized protein LOC103634684	--	[R]	General function prediction only	Reverse transcriptase (RNA-dependent DNA polymerase)	Retrovirus-related Pol polyprotein from transposon RE2 OS=Arabidopsis thaliana OX=3702 GN=RE2 PE=4 SV=1	G	Carbohydrate transport and metabolism	Retrovirus-related Pol polyprotein from transposon TNT 1-94 [Vitis vinifera]
Cyclocarya_paliurus_newGene_20399	0	0	0	477	204	163	0	0	0	3.55317	1.56426	1.45567	1.89687028095423e-05	6.02453074731995	up	[C]	Energy production and conversion	Molecular Function: electron carrier activity (GO:0009055);; Molecular Function: iron-sulfur cluster binding (GO:0051536);;	K22071|1.0e-71|jre:108989175|K22071 ferredoxin-2, mitochondrial | (RefSeq) adrenodoxin-like protein 2, mitochondrial	--	[C]	Energy production and conversion	--	--	C	Energy production and conversion	adrenodoxin-like protein 2, mitochondrial [Juglans regia]
Cyclocarya_paliurus_newGene_13592	0	0	0	373	239	159	0	0	0	4.69917	2.87796	2.479	1.89564345405299e-05	6.01902727297478	up	[G]	Carbohydrate transport and metabolism	Molecular Function: protein kinase activity (GO:0004672);; Molecular Function: ATP binding (GO:0005524);; Biological Process: carbohydrate metabolic process (GO:0005975);; Molecular Function: chitin binding (GO:0008061);; Cellular Component: integral component of membrane (GO:0016021);;	K01183|4.5e-93|nnu:104610684|K01183 chitinase [EC:3.2.1.14] | (RefSeq) chitotriosidase-1-like	Amino sugar and nucleotide sugar metabolism (ko00520)	[G]	Carbohydrate transport and metabolism	Glycosyl hydrolases family 18	Class V chitinase OS=Arabidopsis thaliana OX=3702 GN=ChiC PE=1 SV=1	T	Signal transduction mechanisms	cysteine-rich receptor-like protein kinase 19 [Juglans regia]
Cyclocarya_paliurus_newGene_37575	0	0	0	346	409	111	0	0	0	3.09716	3.80892	1.18247	1.9788969659844e-05	6.0152642319281	up	--	--	Molecular Function: purine nucleoside transmembrane transporter activity (GO:0015211);; Cellular Component: integral component of membrane (GO:0016021);;	--	--	--	--	Purine nucleobase transmembrane transport	Probable purine permease 5 OS=Arabidopsis thaliana OX=3702 GN=PUP5 PE=3 SV=2	S	Function unknown	probable purine permease 5 isoform X1 [Juglans regia]
Cyclocarya_paliurus_newGene_35573	0	0	0	282	255	182	0	0	0	3.85119	3.60166	2.97128	1.9081880043171e-05	6.01328027219073	up	[E]	Amino acid transport and metabolism	Molecular Function: sarcosine oxidase activity (GO:0008115);; Biological Process: tetrahydrofolate metabolic process (GO:0046653);;	K00306|3.7e-110|jre:108988729|K00306 sarcosine oxidase / L-pipecolate oxidase [EC:1.5.3.1 1.5.3.7] | (RefSeq) probable sarcosine oxidase	Glycine, serine and threonine metabolism (ko00260);; Lysine degradation (ko00310);; Peroxisome (ko04146)	[R]	General function prediction only	FAD dependent oxidoreductase	Probable sarcosine oxidase OS=Arabidopsis thaliana OX=3702 GN=At2g24580 PE=2 SV=1	E	Amino acid transport and metabolism	probable sarcosine oxidase [Juglans regia]
Cyclocarya_paliurus_newGene_14355	0	0	0	181	328	223	0	0	0	2.90259	5.60574	4.45935	1.96803837853795e-05	6.00787013208904	up	--	--	Molecular Function: kinase activity (GO:0016301);;	--	--	[T]	Signal transduction mechanisms	Malectin-like domain	Receptor-like protein kinase FERONIA OS=Arabidopsis thaliana OX=3702 GN=FER PE=1 SV=1	T	Signal transduction mechanisms	hypothetical protein F2P56_001781 [Juglans regia]
Cyclocarya_paliurus_newGene_24248	0	0	0	163	384	216	0	0	0	4.99929	12.208	7.97899	2.03253514022344e-05	6.00252750955187	up	[IQR]	Lipid transport and metabolism;; Secondary metabolites biosynthesis, transport and catabolism;; General function prediction only	Molecular Function: oxidoreductase activity (GO:0016491);;	K13070|9.4e-73|dosa:Os04t0179200-01|K13070 momilactone-A synthase [EC:1.1.1.295] | (RefSeq) Os04g0179200, MAS, MOMILACTONE_A_SYNTHASE; Similar to Stem secoisolariciresinol dehydrogenase (Fragment).	Diterpenoid biosynthesis (ko00904)	[R]	General function prediction only	Enoyl-(Acyl carrier protein) reductase	Secoisolariciresinol dehydrogenase (Fragment) OS=Forsythia intermedia OX=55183 PE=1 SV=1	Q	Secondary metabolites biosynthesis, transport and catabolism	secoisolariciresinol dehydrogenase-like [Juglans regia]
Cyclocarya_paliurus_newGene_16429	0	0	0	226	315	170	0	0	0	2.10242	2.98893	1.8757	2.05130811063492e-05	5.99464995271865	up	[R]	General function prediction only	Biological Process: defense response (GO:0006952);; Molecular Function: ADP binding (GO:0043531);;	K13457|4.1e-114|qsu:111991885|K13457 disease resistance protein RPM1 | (RefSeq) putative disease resistance protein At1g50180	Plant-pathogen interaction (ko04626)	[T]	Signal transduction mechanisms	NB-ARC domain	Putative disease resistance protein At1g50180 OS=Arabidopsis thaliana OX=3702 GN=At1g50180 PE=3 SV=2	T	Signal transduction mechanisms	putative disease resistance protein At1g50180 isoform X1 [Juglans regia]
Cyclocarya_paliurus_newGene_9223	0	0	0	214	256	211	0	0	0	1.13282	1.40007	1.33537	2.07020226534507e-05	5.99015012806278	up	[T]	Signal transduction mechanisms	Molecular Function: protein serine/threonine kinase activity (GO:0004674);; Molecular Function: ATP binding (GO:0005524);; Cellular Component: integral component of membrane (GO:0016021);;	K13420|1.3e-146|jre:109013621|K13420 LRR receptor-like serine/threonine-protein kinase FLS2 [EC:2.7.11.1] | (RefSeq) probable LRR receptor-like serine/threonine-protein kinase At3g47570	MAPK signaling pathway - plant (ko04016);; Plant-pathogen interaction (ko04626)	--	--	Protein tyrosine and serine/threonine kinase	Receptor kinase-like protein Xa21 OS=Oryza sativa subsp. indica OX=39946 GN=XA21 PE=1 SV=1	T	Signal transduction mechanisms	hypothetical protein F2P56_009017 [Juglans regia]
Cyclocarya_paliurus_newGene_6132	5	0	0	1072	1155	888	0.032313	0	0	6.72949	8.75188	6.60268	1.96222318365223e-05	5.96024327022737	up	[M]	Cell wall/membrane/envelope biogenesis	Molecular Function: protein serine/threonine kinase activity (GO:0004674);; Molecular Function: ATP binding (GO:0005524);;	K01180|3.6e-61|cmax:111487562|K01180 endo-1,3(4)-beta-glucanase [EC:3.2.1.6] | (RefSeq) uncharacterized protein LOC111487562	--	[T]	Signal transduction mechanisms	Protein kinase domain	Cold-responsive protein kinase 1 OS=Arabidopsis thaliana OX=3702 GN=CRPK1 PE=1 SV=1	T	Signal transduction mechanisms	cold-responsive protein kinase 1 [Juglans regia]
Cyclocarya_paliurus_newGene_16807	0	0	0	224	261	141	0	0	0	3.00277	3.86526	2.26132	2.63627086209666e-05	5.92276550315022	up	[M]	Cell wall/membrane/envelope biogenesis	Biological Process: nucleotide-sugar biosynthetic process (GO:0009226);; Molecular Function: oxidoreductase activity (GO:0016491);;	K02377|5.0e-182|jre:108993031|K02377 GDP-L-fucose synthase [EC:1.1.1.271] | (RefSeq) GDP-L-fucose synthase 1-like	Fructose and mannose metabolism (ko00051);; Amino sugar and nucleotide sugar metabolism (ko00520)	[GO]	Carbohydrate transport and metabolism;; Posttranslational modification, protein turnover, chaperones	NAD dependent epimerase/dehydratase family	Putative GDP-L-fucose synthase 2 OS=Arabidopsis thaliana OX=3702 GN=GER2 PE=1 SV=1	--	--	GDP-L-fucose synthase 1-like [Juglans regia]
Cyclocarya_paliurus_newGene_4149	0	0	0	152	280	180	0	0	0	6.70422	12.7576	9.49686	2.82294004624891e-05	5.90504757527298	up	--	--	Biological Process: defense response (GO:0006952);;	--	--	--	--	Pathogenesis-related protein Bet v 1 family	MLP-like protein 43 OS=Arabidopsis thaliana OX=3702 GN=MLP43 PE=1 SV=1	S	Function unknown	MLP-like protein 43 [Juglans regia]
Cyclocarya_paliurus_newGene_31639	0	0	0	205	168	188	0	0	0	1.56306	1.3886	1.72846	3.06363091656373e-05	5.8782098777437	up	[T]	Signal transduction mechanisms	Molecular Function: protein serine/threonine kinase activity (GO:0004674);; Molecular Function: ATP binding (GO:0005524);;	K13416|5.0e-61|zju:107427532|K13416 brassinosteroid insensitive 1-associated receptor kinase 1 [EC:2.7.10.1 2.7.11.1] | (RefSeq) dual specificity protein kinase zakA-like	MAPK signaling pathway - plant (ko04016);; Plant hormone signal transduction (ko04075);; Plant-pathogen interaction (ko04626)	[T]	Signal transduction mechanisms	Protein kinase domain	Receptor like protein kinase S.2 OS=Arabidopsis thaliana OX=3702 GN=LECRKS2 PE=2 SV=2	T	Signal transduction mechanisms	receptor like protein kinase S.2 [Juglans regia]
Cyclocarya_paliurus_newGene_37755	3	0	0	619	372	562	0.085543	0	0	17.1219	11.8919	16.8727	2.46809442348279e-05	5.86999938724209	up	--	--	Molecular Function: protein serine/threonine kinase activity (GO:0004674);; Molecular Function: ATP binding (GO:0005524);; Cellular Component: integral component of membrane (GO:0016021);;	K13420|3.7e-07|cit:107175457|K13420 LRR receptor-like serine/threonine-protein kinase FLS2 [EC:2.7.11.1] | (RefSeq) probable LRR receptor-like serine/threonine-protein kinase At3g47570	MAPK signaling pathway - plant (ko04016);; Plant-pathogen interaction (ko04626)	--	--	--	Probable LRR receptor-like serine/threonine-protein kinase At3g47570 OS=Arabidopsis thaliana OX=3702 GN=At3g47570 PE=2 SV=1	T	Signal transduction mechanisms	putative leucine-rich repeat receptor-like serine/threonine-protein kinase At2g24130 [Juglans regia]
Cyclocarya_paliurus_newGene_33175	0	0	0	223	168	156	0	0	0	2.3124	1.8109	1.93333	3.28107461111469e-05	5.85824550065026	up	[I]	Lipid transport and metabolism	Molecular Function: 3-hydroxyacyl-CoA dehydrogenase activity (GO:0003857);; Biological Process: fatty acid metabolic process (GO:0006631);;	K10527|0.0e+00|jre:108987297|K10527 enoyl-CoA hydratase/3-hydroxyacyl-CoA dehydrogenase [EC:4.2.1.17 1.1.1.35 1.1.1.211] | (RefSeq) glyoxysomal fatty acid beta-oxidation multifunctional protein MFP-a-like	Fatty acid degradation (ko00071);; alpha-Linolenic acid metabolism (ko00592);; Fatty acid metabolism (ko01212)	[I]	Lipid transport and metabolism	3-hydroxyacyl-CoA dehydrogenase, NAD binding domain	Glyoxysomal fatty acid beta-oxidation multifunctional protein MFP-a OS=Cucumis sativus OX=3659 PE=1 SV=1	I	Lipid transport and metabolism	glyoxysomal fatty acid beta-oxidation multifunctional protein MFP-a-like [Juglans regia]
Cyclocarya_paliurus_newGene_3236	0	0	0	509	750	40	0	0	0	13.8267	21.1283	1.29656	4.04936669675178e-05	5.84792098086588	up	--	--	--	K12173|9.4e-42|gmx:100794341|K12173 BRCA1-A complex subunit BRE | (RefSeq) BRISC and BRCA1-A complex member 2	Homologous recombination (ko03440)	--	--	Thaumatin family	Thaumatin-like protein 1a OS=Malus domestica OX=3750 GN=TL1 PE=1 SV=1	T	Signal transduction mechanisms	thaumatin-like protein 1b [Juglans regia]
Cyclocarya_paliurus_newGene_7997	0	0	0	180	232	125	0	0	0	2.02108	2.68257	1.68169	3.58683330097642e-05	5.83375977330591	up	--	--	Molecular Function: DNA binding (GO:0003677);; Molecular Function: transcription factor activity, sequence-specific DNA binding (GO:0003700);; Cellular Component: nucleus (GO:0005634);;	K09286|3.4e-135|jre:108984562|K09286 EREBP-like factor | (RefSeq) ethylene-responsive transcription factor 3-like	--	--	--	AP2 domain	Ethylene-responsive transcription factor 3 OS=Nicotiana tabacum OX=4097 GN=ERF3 PE=2 SV=1	K	Transcription	ethylene-responsive transcription factor 3-like [Juglans regia]
Cyclocarya_paliurus_newGene_3337	0	0	0	145	240	145	0	0	0	7.24639	12.474	8.71881	3.69464225436609e-05	5.82589655291235	up	--	--	--	K12173|7.3e-25|gmx:100794341|K12173 BRCA1-A complex subunit BRE | (RefSeq) BRISC and BRCA1-A complex member 2	Homologous recombination (ko03440)	--	--	Thaumatin family	Thaumatin-like protein 1a OS=Malus domestica OX=3750 GN=TL1 PE=1 SV=1	T	Signal transduction mechanisms	thaumatin-like protein 1b [Juglans regia]
Cyclocarya_paliurus_newGene_12797	0	0	0	183	232	118	0	0	0	1.60179	2.10848	1.23956	3.70189557210044e-05	5.8249853533175	up	--	--	Molecular Function: molecular_function (GO:0003674);; Molecular Function: nucleic acid binding (GO:0003676);; Molecular Function: RNA binding (GO:0003723);; Molecular Function: catalytic activity (GO:0003824);; Molecular Function: nuclease activity (GO:0004518);; Molecular Function: endonuclease activity (GO:0004519);; Molecular Function: binding (GO:0005488);; Cellular Component: cellular_compon…	K17710|2.9e-16|mesc:110623943|K17710 pentatricopeptide repeat domain-containing protein 1 | (RefSeq) putative pentatricopeptide repeat-containing protein At2g02150	--	[R]	General function prediction only	PPR repeat family	Pentatricopeptide repeat-containing protein At5g40400 OS=Arabidopsis thaliana OX=3702 GN=At5g40400 PE=2 SV=1	S	Function unknown	pentatricopeptide repeat-containing protein At5g40400 [Juglans regia]
Cyclocarya_paliurus_newGene_35254	0	0	0	266	205	94	0	0	0	6.91307	5.50583	2.8971	3.77887706120233e-05	5.82305137101464	up	[E]	Amino acid transport and metabolism	Molecular Function: prephenate dehydrogenase (NADP+) activity (GO:0004665);; Biological Process: tyrosine biosynthetic process (GO:0006571);; Molecular Function: prephenate dehydrogenase (NAD+) activity (GO:0008977);;	K15227|1.2e-118|jre:108991826|K15227 arogenate dehydrogenase (NADP+), plant [EC:1.3.1.78] | (RefSeq) arogenate dehydrogenase 1, chloroplastic-like	Phenylalanine, tyrosine and tryptophan biosynthesis (ko00400);; Biosynthesis of amino acids (ko01230)	[E]	Amino acid transport and metabolism	Prephenate dehydrogenase	Arogenate dehydrogenase 1, chloroplastic OS=Arabidopsis thaliana OX=3702 GN=TYRAAT1 PE=1 SV=1	E	Amino acid transport and metabolism	arogenate dehydrogenase 1, chloroplastic-like [Juglans regia]
Cyclocarya_paliurus_newGene_24112	2	0	0	277	440	279	0.010752	0	0	3.65057	6.21392	4.46692	2.83571239970788e-05	5.81421076855577	up	--		Molecular Function: protein kinase activity (GO:0004672);; Molecular Function: ATP binding (GO:0005524);; Cellular Component: integral component of membrane (GO:0016021);;	K00924|6.9e-22|zju:107416173|K00924 kinase [EC:2.7.1.-] | (RefSeq) receptor protein kinase TMK1	--	--	--	Salt stress response/antifungal	Cysteine-rich receptor-like protein kinase 26 OS=Arabidopsis thaliana OX=3702 GN=CRK26 PE=2 SV=1	T	Signal transduction mechanisms	putative receptor-like protein kinase At4g00960 [Juglans regia]
Cyclocarya_paliurus_newGene_26760	0	0	0	167	177	146	0	0	0	3.50993	3.83773	3.68073	4.01773350680647e-05	5.7986018851452	up	[J]	Translation, ribosomal structure and biogenesis	Molecular Function: RNA binding (GO:0003723);;	K14396|5.1e-105|jre:108995676|K14396 polyadenylate-binding protein 2 | (RefSeq) polyadenylate-binding protein 2-like isoform X1	mRNA surveillance pathway (ko03015)	[A]	RNA processing and modification	RNA recognition motif. (a.k.a. RRM, RBD, or RNP domain)	Polyadenylate-binding protein 2 OS=Arabidopsis thaliana OX=3702 GN=PABN2 PE=1 SV=1	A	RNA processing and modification	polyadenylate-binding protein 2-like isoform X2 [Juglans regia]
Cyclocarya_paliurus_newGene_35569	0	0	0	127	180	191	0	0	0	2.26428	3.4206	4.30791	4.0903000957887e-05	5.79657912622541	up	[R]	General function prediction only	Biological Process: lipid catabolic process (GO:0016042);; Molecular Function: hydrolase activity (GO:0016787);;	K16815|6.2e-12|gsl:Gasu_03780|K16815 calcium-independent phospholipase A2-gamma | (RefSeq) hypothetical protein	--	[I]	Lipid transport and metabolism	Patatin-like phospholipase	Patatin-like protein 2 OS=Arabidopsis thaliana OX=3702 GN=PLP2 PE=1 SV=1	I	Lipid transport and metabolism	patatin-like protein 2 [Juglans regia]
Cyclocarya_paliurus_newGene_16399	0	0	0	178	124	192	0	0	0	2.62852	1.94892	3.26564	4.17074627028412e-05	5.79077043156707	up	[GEPR]	Carbohydrate transport and metabolism;; Amino acid transport and metabolism;; Inorganic ion transport and metabolism;; General function prediction only	Cellular Component: integral component of membrane (GO:0016021);; Molecular Function: transmembrane transporter activity (GO:0022857);;	K08202|1.5e-71|cann:107878736|K08202 MFS transporter, OCT family, solute carrier family 22 (organic cation transporter), member 4/5 | (RefSeq) organic cation/carnitine transporter 4	--	[R]	General function prediction only	Sugar (and other) transporter	Organic cation/carnitine transporter 3 OS=Arabidopsis thaliana OX=3702 GN=OCT3 PE=2 SV=1	S	Function unknown	organic cation/carnitine transporter 3-like [Juglans regia]
Cyclocarya_paliurus_newGene_5869	0	0	0	128	257	124	0	0	0	1.79642	3.72828	2.07639	4.36253607337049e-05	5.77991227506695	up	--	--	--	K18643|4.2e-42|gra:105795008|K18643 katanin p80 WD40 repeat-containing subunit B1 | (RefSeq) uncharacterized LOC105795008	--	--	--	Protein of unknown function (DUF789)	--	S	Function unknown	uncharacterized protein LOC108998596 [Juglans regia]
Cyclocarya_paliurus_newGene_25120	0	0	0	118	244	107	0	0	0	1.09553	3.26895	1.18943	5.29655415360813e-05	5.72321108783971	up	--	--	Cellular Component: integral component of membrane (GO:0016021);; Biological Process: transmembrane transport (GO:0055085);;	K24139|5.1e-112|jre:109007719|K24139 auxin efflux carrier family protein | (RefSeq) protein PIN-LIKES 3-like	--	[S]	Function unknown	Membrane transport protein	Protein PIN-LIKES 3 OS=Arabidopsis thaliana OX=3702 GN=PILS3 PE=2 SV=1	S	Function unknown	protein PIN-LIKES 3-like [Juglans regia]
Cyclocarya_paliurus_newGene_6068	0	0	0	139	120	168	0	0	0	2.62776	2.29139	3.99887	5.49263436180635e-05	5.70841341515915	up	--	--	Cellular Component: nucleus (GO:0005634);; Molecular Function: protein heterodimerization activity (GO:0046982);;	K08066|2.8e-130|jre:109011255|K08066 nuclear transcription factor Y, gamma | (RefSeq) nuclear transcription factor Y subunit C-2	--	[K]	Transcription	Core histone H2A/H2B/H3/H4	Nuclear transcription factor Y subunit C-4 OS=Oryza sativa subsp. japonica OX=39947 GN=NFYC4 PE=1 SV=1	K	Transcription	nuclear transcription factor Y subunit C-2 [Juglans regia]
Cyclocarya_paliurus_newGene_17371	0	0	0	182	150	100	0	0	0	1.91003	1.67149	1.24263	5.55345868353069e-05	5.70408516685986	up	[I]	Lipid transport and metabolism	Molecular Function: catalytic activity (GO:0003824);;	K01897|1.4e-72|jre:108993714|K01897 long-chain acyl-CoA synthetase [EC:6.2.1.3] | (RefSeq) long chain acyl-CoA synthetase 1-like	Fatty acid biosynthesis (ko00061);; Fatty acid degradation (ko00071);; Fatty acid metabolism (ko01212);; Peroxisome (ko04146)	[I]	Lipid transport and metabolism	AMP-binding enzyme	Long chain acyl-CoA synthetase 1 OS=Arabidopsis thaliana OX=3702 GN=LACS1 PE=2 SV=1	I	Lipid transport and metabolism	hypothetical protein F2P56_018396, partial [Juglans regia]
Cyclocarya_paliurus_newGene_13336	0	0	0	96	304	94	0	0	0	0.798761	2.64953	0.944288	6.13982928153304e-05	5.68775264015942	up	--		Molecular Function: protein kinase activity (GO:0004672);; Molecular Function: calcium ion binding (GO:0005509);; Molecular Function: ATP binding (GO:0005524);; Cellular Component: integral component of membrane (GO:0016021);; Molecular Function: polysaccharide binding (GO:0030247);;	K23544|6.7e-93|brp:103842861|K23544 serine incorporator 1/3 | (RefSeq) serine incorporator 3	--	--	--	Protein kinase domain	Wall-associated receptor kinase 5 OS=Arabidopsis thaliana OX=3702 GN=WAK5 PE=2 SV=1	T	Signal transduction mechanisms	hypothetical protein F2P56_012089 [Juglans regia]
Cyclocarya_paliurus_newGene_13434	0	0	0	160	134	114	0	0	0	1.82737	1.57675	1.56033	5.94765831373643e-05	5.68233624308744	up	--	--	Molecular Function: molecular_function (GO:0003674);; Molecular Function: nucleic acid binding (GO:0003676);; Molecular Function: RNA binding (GO:0003723);; Molecular Function: catalytic activity (GO:0003824);; Molecular Function: nuclease activity (GO:0004518);; Molecular Function: endonuclease activity (GO:0004519);; Molecular Function: binding (GO:0005488);; Cellular Component: cellular_compon…	K13800|1.7e-203|csv:101217681|K13800 UMP-CMP kinase [EC:2.7.4.14] | (RefSeq) UMP-CMP kinase isoform X1	Pyrimidine metabolism (ko00240)	[R]	General function prediction only	PPR repeat	Pentatricopeptide repeat-containing protein At4g25270, chloroplastic OS=Arabidopsis thaliana OX=3702 GN=PCMP-E53 PE=3 SV=1	F	Nucleotide transport and metabolism	pentatricopeptide repeat-containing protein At4g25270, chloroplastic [Juglans regia]
Cyclocarya_paliurus_newGene_9716	0	0	0	152	154	94	0	0	0	2.44016	2.93467	1.8277	6.42662997534939e-05	5.65988849901312	up	--	--	Cellular Component: integral component of membrane (GO:0016021);;	--	--	--	--	Protein of unknown function (DUF1084)	Tobamovirus multiplication protein 1 OS=Nicotiana tabacum OX=4097 GN=TOM1 PE=1 SV=1	S	Function unknown	tobamovirus multiplication protein 1 [Juglans regia]
Cyclocarya_paliurus_newGene_18357	0	0	0	127	131	117	0	0	0	1.38125	1.46755	1.52056	6.95575141309488e-05	5.63498264416613	up	--	--	Molecular Function: protein kinase activity (GO:0004672);; Molecular Function: ATP binding (GO:0005524);; Cellular Component: integral component of membrane (GO:0016021);; Molecular Function: carbohydrate binding (GO:0030246);;	K01176|3.5e-21|sbi:8065370|K01176 alpha-amylase [EC:3.2.1.1] | (RefSeq) alpha-amylase isozyme 2A	Starch and sucrose metabolism (ko00500)	--	--	Legume lectin domain	L-type lectin-domain containing receptor kinase IX.1 OS=Arabidopsis thaliana OX=3702 GN=LECRK91 PE=1 SV=1	T	Signal transduction mechanisms	L-type lectin-domain containing receptor kinase IX.1-like [Juglans regia]
Cyclocarya_paliurus_newGene_34511	0	0	0	114	166	98	0	0	0	2.23382	3.34908	2.30355	7.2564325002717e-05	5.62384606223178	up	--	--	--	K00326|3.8e-13|ccav:112516820|K00326 cytochrome-b5 reductase [EC:1.6.2.2] | (RefSeq) NADH-cytochrome b5 reductase-like protein	Amino sugar and nucleotide sugar metabolism (ko00520)	--	--	Domain of unknown function (DUF4666)	MAPK kinase substrate protein At1g80180 OS=Arabidopsis thaliana OX=3702 GN=At1g80180 PE=1 SV=1	S	Function unknown	MAPK kinase substrate protein At1g80180-like [Juglans regia]
Cyclocarya_paliurus_newGene_26402	0	0	0	133	99	133	0	0	0	3.5251	2.6964	4.22959	7.54605583190792e-05	5.61188535191776	up	--	--	--	--	--	--	--	--	--	--	--	uncharacterized protein LOC108979171 [Juglans regia]
Cyclocarya_paliurus_newGene_18355	0	0	0	129	87	140	0	0	0	1.71362	1.20533	2.25641	8.19287477205725e-05	5.58837386416565	up	[QV]	Secondary metabolites biosynthesis, transport and catabolism;; Defense mechanisms	Molecular Function: monooxygenase activity (GO:0004497);; Molecular Function: iron ion binding (GO:0005506);; Cellular Component: integral component of membrane (GO:0016021);; Molecular Function: oxidoreductase activity, acting on paired donors, with incorporation or reduction of molecular oxygen (GO:0016705);; Molecular Function: heme binding (GO:0020037);;	K23136|1.8e-131|pop:18104964|K23136 fraxetin 5-hydroxylase [EC:1.14.14.164] | (RefSeq) cytochrome P450 82C4	--	[Q]	Secondary metabolites biosynthesis, transport and catabolism	Cytochrome P450	Xanthotoxin 5-hydroxylase CYP82C4 OS=Arabidopsis thaliana OX=3702 GN=CYP82C4 PE=1 SV=1	Q	Secondary metabolites biosynthesis, transport and catabolism	cytochrome P450 CYP82D47-like [Juglans regia]
Cyclocarya_paliurus_newGene_19195	16	0	0	3063	3520	2598	0.170091	0	0	13.557	15.6302	13.2931	9.13115925253534e-05	5.57089257653199	up	--	--	Biological Process: intracellular protein transport (GO:0006886);; Cellular Component: AP-2 adaptor complex (GO:0030122);; Molecular Function: clathrin adaptor activity (GO:0035615);; Biological Process: clathrin-dependent endocytosis (GO:0072583);;	K11824|0.0e+00|jre:109000672|K11824 AP-2 complex subunit alpha | (RefSeq) AP-2 complex subunit alpha-1-like	Endocytosis (ko04144)	[U]	Intracellular trafficking, secretion, and vesicular transport	Adaptin N terminal region	AP-2 complex subunit alpha-1 OS=Arabidopsis thaliana OX=3702 GN=ALPHA-ADR PE=1 SV=1	U	Intracellular trafficking, secretion, and vesicular transport	AP-2 complex subunit alpha-1-like [Juglans regia]
Cyclocarya_paliurus_newGene_1373	0	0	0	81	114	146	0	0	0	1.2101	1.65699	2.21091	9.16530222437715e-05	5.55562731077524	up	--	--	Molecular Function: DNA binding (GO:0003677);; Cellular Component: nucleus (GO:0005634);;	--	--	--	--	--	Myb family transcription factor PHL5 OS=Arabidopsis thaliana OX=3702 GN=PHL5 PE=2 SV=1	K	Transcription	protein PHR1-LIKE 1-like isoform X2 [Juglans regia]
Cyclocarya_paliurus_newGene_4418	0	0	0	117	106	107	0	0	0	1.51074	0.922643	1.40631	9.07564324202743e-05	5.5538734941138	up	--	--	--	--	--	--	--	--	--	--	--	hypothetical protein F2P56_008489 [Juglans regia]
Cyclocarya_paliurus_newGene_18417	0	0	0	149	67	118	0	0	0	1.50434	0.698533	1.42479	0.000100612118162078	5.52725146740797	up	[T]	Signal transduction mechanisms	Molecular Function: protein serine/threonine kinase activity (GO:0004674);; Molecular Function: ATP binding (GO:0005524);;	K00924|3.2e-149|qsu:112032229|K00924 kinase [EC:2.7.1.-] | (RefSeq) probable serine/threonine-protein kinase PBL19	--	[T]	Signal transduction mechanisms	Protein kinase domain	Probable serine/threonine-protein kinase PBL19 OS=Arabidopsis thaliana OX=3702 GN=PBL19 PE=1 SV=1	T	Signal transduction mechanisms	probable serine/threonine-protein kinase PBL19 [Juglans regia]
Cyclocarya_paliurus_newGene_18327	0	0	0	200	80	73	0	0	0	2.80602	1.14878	1.21753	0.000102406309837432	5.52458019531111	up	--	--	Cellular Component: integral component of membrane (GO:0016021);;	K09422|6.9e-15|rcu:8265812|K09422 transcription factor MYB, plant | (RefSeq) transcription factor DUO1	--	--	--	Plant protein of unknown function	UPF0481 protein At3g47200 OS=Arabidopsis thaliana OX=3702 GN=At3g47200 PE=2 SV=1	S	Function unknown	uncharacterized protein LOC108990314 [Juglans regia]
Cyclocarya_paliurus_newGene_33044	0	0	0	136	234	38	0	0	0	4.39001	7.85738	1.47834	0.000106764124127454	5.52303441100676	up	--	--	Molecular Function: protein phosphatase inhibitor activity (GO:0004864);; Biological Process: defense response (GO:0006952);; Biological Process: response to biotic stimulus (GO:0009607);; Biological Process: abscisic acid-activated signaling pathway (GO:0009738);; Molecular Function: abscisic acid binding (GO:0010427);; Molecular Function: signaling receptor activity (GO:0038023);;	K05387|5.7e-14|peq:110030824|K05387 glutamate receptor, ionotropic, plant | (RefSeq) LOW QUALITY PROTEIN: glutamate receptor 2.3-like	--	--	--	Pathogenesis-related protein Bet v 1 family	Major allergen Pru ar 1 OS=Prunus armeniaca OX=36596 PE=1 SV=1	S	Function unknown	major allergen Pru ar 1-like [Juglans regia]
Cyclocarya_paliurus_newGene_16785	0	0	0	104	384	34	0	0	0	1.56923	6.02109	0.614116	0.000114537280777248	5.51887964169208	up	[QV]	Secondary metabolites biosynthesis, transport and catabolism;; Defense mechanisms	Molecular Function: monooxygenase activity (GO:0004497);; Molecular Function: iron ion binding (GO:0005506);; Cellular Component: integral component of membrane (GO:0016021);; Molecular Function: oxidoreductase activity, acting on paired donors, with incorporation or reduction of molecular oxygen (GO:0016705);; Molecular Function: heme binding (GO:0020037);;	K20667|1.8e-284|jre:108993145|K20667 beta-amyrin 28-monooxygenase [EC:1.14.14.126] | (RefSeq) beta-amyrin 28-monooxygenase-like	--	[QI]	Secondary metabolites biosynthesis, transport and catabolism;; Lipid transport and metabolism	Cytochrome P450	Beta-amyrin 28-monooxygenase OS=Vitis vinifera OX=29760 GN=CYP716A15 PE=1 SV=1	Q	Secondary metabolites biosynthesis, transport and catabolism	beta-amyrin 28-monooxygenase-like [Juglans regia]
Cyclocarya_paliurus_newGene_10195	8	0	0	899	1021	745	0.132058	0	0	19.861	23.3403	19.7475	9.08727525973462e-05	5.50942324735988	up	--	--	Molecular Function: transcription factor activity, sequence-specific DNA binding (GO:0003700);; Cellular Component: nucleus (GO:0005634);; Cellular Component: host cell nucleus (GO:0042025);; Molecular Function: sequence-specific DNA binding (GO:0043565);;	K09419|4.2e-106|jre:108987791|K09419 heat shock transcription factor, other eukaryote | (RefSeq) heat stress transcription factor B-3-like	--	[K]	Transcription	HSF-type DNA-binding	Heat stress transcription factor B-3 OS=Arabidopsis thaliana OX=3702 GN=HSFB3 PE=1 SV=1	K	Transcription	heat stress transcription factor B-3-like [Juglans regia]
Cyclocarya_paliurus_newGene_30911	0	0	0	110	128	76	0	0	0	1.10596	1.36901	0.944493	0.000105656470541638	5.50767694485162	up	--	--	Molecular Function: zinc ion binding (GO:0008270);;	K05849|1.2e-120|ini:109158657|K05849 solute carrier family 8 (sodium/calcium exchanger) | (RefSeq) pentatricopeptide repeat-containing protein At3g62890-like	--	[R]	General function prediction only	PPR repeat family	Pentatricopeptide repeat-containing protein At5g48910 OS=Arabidopsis thaliana OX=3702 GN=PCMP-H38 PE=2 SV=1	S	Function unknown	pentatricopeptide repeat-containing protein At4g21065-like [Juglans regia]
Cyclocarya_paliurus_newGene_21439	0	0	0	250	74	54	0	0	0	4.54766	1.39373	1.19667	0.000119294490653329	5.48670883800817	up	--	--	Molecular Function: phospholipid binding (GO:0005543);;	K20043|2.1e-88|mtr:MTR_3g086670|K20043 clathrin coat assembly protein AP180 | (RefSeq) clathrin assembly protein	--	[TU]	Signal transduction mechanisms;; Intracellular trafficking, secretion, and vesicular transport	ANTH domain	Putative clathrin assembly protein At4g40080 OS=Arabidopsis thaliana OX=3702 GN=At4g40080 PE=2 SV=2	--	--	putative clathrin assembly protein At4g40080 [Juglans regia]
Cyclocarya_paliurus_newGene_30695	0	0	0	102	102	91	0	0	0	1.63948	1.68808	1.75301	0.000114629099125342	5.48126560114541	up	--	--	Cellular Component: integral component of membrane (GO:0016021);;	--	--	--	--	Cotton fibre expressed protein	--	S	Function unknown	hypothetical protein F2P56_020851, partial [Juglans regia]
Cyclocarya_paliurus_newGene_30025	0	0	0	72	143	65	0	0	0	1.37341	2.8098	1.47804	0.000147334193388889	5.40717762842318	up	[M]	Cell wall/membrane/envelope biogenesis	Biological Process: galactose metabolic process (GO:0006012);; Molecular Function: inositol 3-alpha-galactosyltransferase activity (GO:0047216);;	K18819|2.1e-191|jre:108986176|K18819 inositol 3-alpha-galactosyltransferase [EC:2.4.1.123] | (RefSeq) galactinol synthase 2-like	Galactose metabolism (ko00052)	[G]	Carbohydrate transport and metabolism	Glycosyl transferase family 8	Galactinol synthase 2 OS=Solanum lycopersicum OX=4081 GN=GOLS2 PE=2 SV=1	G	Carbohydrate transport and metabolism	galactinol synthase 2-like [Juglans regia]
Cyclocarya_paliurus_newGene_11664	0	0	0	128	74	70	0	0	0	0.957056	0.540716	0.587904	0.000147430658147545	5.40433564862383	up	--	--	Cellular Component: nucleus (GO:0005634);; Biological Process: regulation of transcription, DNA-templated (GO:0006355);; Molecular Function: zinc ion binding (GO:0008270);;	K17604|8.4e-79|ini:109172309|K17604 zinc finger SWIM domain-containing protein 3 | (RefSeq) protein FAR1-RELATED SEQUENCE 6-like	--	--	--	MULE transposase domain	Protein FAR1-RELATED SEQUENCE 5 OS=Arabidopsis thaliana OX=3702 GN=FRS5 PE=1 SV=1	S	Function unknown	protein FAR1-RELATED SEQUENCE 5-like [Juglans regia]
Cyclocarya_paliurus_newGene_38616	0	0	0	70	72	127	0	0	0	1.4392	1.43097	3.14528	0.000152288631751594	5.39791733528487	up	--	--	--	K13945|1.5e-12|jre:108995954|K13945 LOB domain-containing protein 29 | (RefSeq) LOB domain-containing protein 14-like	--	--	--	--	--	--	--	LOB domain-containing protein 14-like [Juglans regia]
Cyclocarya_paliurus_newGene_75	0	0	0	43	133	107	0	0	0	5.01864	15.9875	14.9281	0.000158739637974715	5.38944364725203	up	--	--	Molecular Function: protein kinase activity (GO:0004672);; Molecular Function: ATP binding (GO:0005524);; Cellular Component: integral component of membrane (GO:0016021);;	--	--	--	--	--	--	T	Signal transduction mechanisms	probable leucine-rich repeat receptor-like serine/threonine-protein kinase At3g14840 [Juglans regia]
Cyclocarya_paliurus_newGene_23690	2	0	0	262	199	111	0.012295	0	0	3.85869	3.00128	1.86747	0.000112387314271308	5.38832946937291	up	[Q]	Secondary metabolites biosynthesis, transport and catabolism	Molecular Function: metal ion binding (GO:0046872);; Molecular Function: dioxygenase activity (GO:0051213);;	K24028|6.2e-42|mus:103982364|K24028 salicylic acid 3-hydroxylase [EC:1.14.11.-] | (RefSeq) protein DOWNY MILDEW RESISTANCE 6-like isoform X2	--	[QR]	Secondary metabolites biosynthesis, transport and catabolism;; General function prediction only	2OG-Fe(II) oxygenase superfamily	Probable 2-oxoglutarate-dependent dioxygenase At5g05600 OS=Arabidopsis thaliana OX=3702 GN=At5g05600 PE=2 SV=1	Q	Secondary metabolites biosynthesis, transport and catabolism	probable 2-oxoglutarate-dependent dioxygenase At5g05600 isoform X1 [Juglans regia]
Cyclocarya_paliurus_newGene_19939	0	0	0	41	117	123	0	0	0	0.507274	1.49833	1.83465	0.00016311397430122	5.38201668029115	up	--	--	Molecular Function: molecular_function (GO:0003674);; Molecular Function: nucleic acid binding (GO:0003676);; Molecular Function: RNA binding (GO:0003723);; Molecular Function: catalytic activity (GO:0003824);; Molecular Function: nuclease activity (GO:0004518);; Molecular Function: endonuclease activity (GO:0004519);; Molecular Function: binding (GO:0005488);; Cellular Component: cellular_compon…	--	--	[R]	General function prediction only	PPR repeat family	Pentatricopeptide repeat-containing protein At1g07590, mitochondrial OS=Arabidopsis thaliana OX=3702 GN=At1g07590 PE=2 SV=1	S	Function unknown	pentatricopeptide repeat-containing protein At1g07590, mitochondrial [Juglans regia]
Cyclocarya_paliurus_newGene_8791	11	0	0	1686	1873	446	0.094322	0	0	20.6588	23.731	6.54239	0.000157571856740234	5.37304054030487	up	[T]	Signal transduction mechanisms	Molecular Function: acid phosphatase activity (GO:0003993);; Molecular Function: metal ion binding (GO:0046872);;	K14379|1.1e-187|jre:108980216|K14379 tartrate-resistant acid phosphatase type 5 [EC:3.1.3.2] | (RefSeq) purple acid phosphatase 3-like	Riboflavin metabolism (ko00740)	[O]	Posttranslational modification, protein turnover, chaperones	Calcineurin-like phosphoesterase	Purple acid phosphatase 3 OS=Arabidopsis thaliana OX=3702 GN=PAP3 PE=2 SV=1	O	Posttranslational modification, protein turnover, chaperones	purple acid phosphatase 3-like [Juglans regia]
Cyclocarya_paliurus_newGene_9552	2	0	0	144	207	184	0.019291	0	0	2.03985	3.06403	2.76065	0.000116992865761623	5.3718302184345	up	[F]	Nucleotide transport and metabolism	Molecular Function: hydrolase activity (GO:0016787);;	K22763|6.2e-39|lja:Lj2g3v1989220.3|K22763 deubiquitinase DESI2 [EC:3.4.19.12] | (RefSeq) Lj2g3v1989220.3; -	--	[T]	Signal transduction mechanisms	NUDIX domain	Nudix hydrolase 2 OS=Arabidopsis thaliana OX=3702 GN=NUDT2 PE=1 SV=1	T	Signal transduction mechanisms	hypothetical protein F2P56_009340 [Juglans regia]
Cyclocarya_paliurus_newGene_4499	0	0	0	95	107	56	0	0	0	1.03881	1.20041	0.779276	0.000163570472404123	5.37072631339185	up	[T]	Signal transduction mechanisms	Molecular Function: protein kinase activity (GO:0004672);; Molecular Function: calcium ion binding (GO:0005509);; Molecular Function: ATP binding (GO:0005524);; Cellular Component: integral component of membrane (GO:0016021);; Molecular Function: polysaccharide binding (GO:0030247);;	K23544|1.3e-87|brp:103842861|K23544 serine incorporator 1/3 | (RefSeq) serine incorporator 3	--	--	--	Protein kinase domain	Wall-associated receptor kinase 3 OS=Arabidopsis thaliana OX=3702 GN=WAK3 PE=2 SV=2	T	Signal transduction mechanisms	wall-associated receptor kinase 2-like [Juglans regia]
Cyclocarya_paliurus_newGene_28208	30	0	0	6155	10004	5005	0.245192	0	0	68.0044	114.953	66.3193	0.000198271137793311	5.3613588914919	up	--	--	Biological Process: regulation of transcription, DNA-templated (GO:0006355);; Biological Process: circadian rhythm (GO:0007623);;	--	--	--	--	--	Protein LNK3 OS=Arabidopsis thaliana OX=3702 GN=LNK3 PE=1 SV=1	--	--	protein LNK3-like isoform X1 [Juglans regia]
Cyclocarya_paliurus_newGene_1278	0	0	0	49	142	77	0	0	0	0.999727	3.00309	1.88034	0.000172371695229061	5.36068649895066	up	--	--	Molecular Function: transcription factor activity, sequence-specific DNA binding (GO:0003700);; Cellular Component: nucleus (GO:0005634);; Cellular Component: host cell nucleus (GO:0042025);; Molecular Function: sequence-specific DNA binding (GO:0043565);;	K09419|2.8e-129|jre:108989320|K09419 heat shock transcription factor, other eukaryote | (RefSeq) heat stress transcription factor B-3-like	--	[K]	Transcription	HSF-type DNA-binding	Heat stress transcription factor B-3 OS=Arabidopsis thaliana OX=3702 GN=HSFB3 PE=1 SV=1	K	Transcription	heat stress transcription factor B-3-like [Juglans regia]
Cyclocarya_paliurus_newGene_1783	0	0	0	74	110	66	0	0	0	2.59831	3.94035	2.72236	0.000170158159925624	5.35790154260844	up	[S]	Function unknown	Cellular Component: extracellular region (GO:0005576);;	K13449|1.2e-106|jre:109020655|K13449 pathogenesis-related protein 1 | (RefSeq) pathogenesis-related protein 1-like	MAPK signaling pathway - plant (ko04016);; Plant hormone signal transduction (ko04075);; Plant-pathogen interaction (ko04626)	[S]	Function unknown	Cysteine-rich secretory protein family	Pathogenesis-related protein 1 OS=Arabidopsis thaliana OX=3702 GN=At2g14610 PE=1 SV=1	L	Replication, recombination and repair	pathogenesis-related protein 1-like [Juglans regia]
Cyclocarya_paliurus_newGene_28547	0	0	0	26	117	173	0	0	0	0.499342	2.37527	4.11027	0.000185418714216067	5.35536873322663	up	--	--	Cellular Component: integral component of membrane (GO:0016021);;	--	--	--	--	BT1 family	Probable folate-biopterin transporter 7 OS=Arabidopsis thaliana OX=3702 GN=At1g64890 PE=2 SV=1	S	Function unknown	probable folate-biopterin transporter 7 [Juglans regia]
Cyclocarya_paliurus_newGene_23403	0	0	0	95	81	68	0	0	0	1.494	1.29921	1.24598	0.000172983688478734	5.35115718273422	up	[G]	Carbohydrate transport and metabolism	Molecular Function: polygalacturonase activity (GO:0004650);; Biological Process: carbohydrate metabolic process (GO:0005975);;	--	--	--	--	Glycosyl hydrolases family 28	Probable polygalacturonase OS=Vitis vinifera OX=29760 GN=GSVIVT00026920001 PE=1 SV=1	G	Carbohydrate transport and metabolism	probable polygalacturonase [Juglans regia]
Cyclocarya_paliurus_newGene_10971	1	0	0	83	94	171	0.005872	0	0	1.02017	2.08101	3.37063	0.00013494495527845	5.34660591038236	up	--	--	Cellular Component: endoplasmic reticulum membrane (GO:0005789);; Cellular Component: integral component of membrane (GO:0016021);;	K13989|5.0e-131|jre:109018862|K13989 Derlin-2/3 | (RefSeq) derlin-1	Protein processing in endoplasmic reticulum (ko04141)	[S]	Function unknown	Der1-like family	Derlin-1 OS=Arabidopsis thaliana OX=3702 GN=DER1 PE=2 SV=1	S	Function unknown	derlin-1 [Juglans regia]
Cyclocarya_paliurus_newGene_29054	0	0	0	89	89	64	0	0	0	0.900561	0.924451	0.774638	0.000176833489029226	5.34415284987801	up	--	--	Molecular Function: molecular_function (GO:0003674);; Molecular Function: catalytic activity (GO:0003824);; Molecular Function: ubiquitin-protein transferase activity (GO:0004842);; Cellular Component: cellular_component (GO:0005575);; Cellular Component: intracellular (GO:0005622);; Cellular Component: cell (GO:0005623);; Cellular Component: nucleus (GO:0005634);; Cellular Component: cytoplasm (…	--	--	[S]	Function unknown	Armadillo/beta-catenin-like repeat	--	S	Function unknown	uncharacterized protein LOC109003062 [Juglans regia]
Cyclocarya_paliurus_newGene_15070	0	0	0	72	89	78	0	0	0	1.75256	2.2268	2.25199	0.000178647576513443	5.34129637847927	up	--	--	Cellular Component: integral component of membrane (GO:0016021);;	--	--	--	--	--	--	O	Posttranslational modification, protein turnover, chaperones	RING-H2 finger protein ATL52-like [Juglans regia]
Cyclocarya_paliurus_newGene_34302	0	0	0	60	169	48	0	0	0	0.592077	1.76146	0.564319	0.000185747108075152	5.34056803323794	up	--	--	Molecular Function: DNA binding (GO:0003677);; Molecular Function: transcription factor activity, sequence-specific DNA binding (GO:0003700);; Cellular Component: nucleus (GO:0005634);;	K12900|5.6e-30|lang:109341833|K12900 FUS-interacting serine-arginine-rich protein 1 | (RefSeq) serine/arginine-rich SC35-like splicing factor SCL30A	Spliceosome (ko03040)	--	--	AP2 domain	Ethylene-responsive transcription factor ERF110 OS=Arabidopsis thaliana OX=3702 GN=ERF110 PE=2 SV=2	K	Transcription	ethylene-responsive transcription factor ABR1-like isoform X1 [Juglans regia]
Cyclocarya_paliurus_newGene_2765	6	0	0	519	562	342	0.115674	0	0	15.9638	17.8887	12.5929	0.000147166062813432	5.32760909330337	up	--	--	Molecular Function: transcription factor activity, sequence-specific DNA binding (GO:0003700);; Cellular Component: nucleus (GO:0005634);; Molecular Function: sequence-specific DNA binding (GO:0043565);;	K12835|1.1e-24|cmax:111493042|K12835 ATP-dependent RNA helicase DDX42 [EC:3.6.4.13] | (RefSeq) DEAD-box ATP-dependent RNA helicase 24 isoform X1	Spliceosome (ko03040)	--	--	WRKY DNA -binding domain	Probable WRKY transcription factor 75 OS=Arabidopsis thaliana OX=3702 GN=WRKY75 PE=1 SV=1	K	Transcription	probable WRKY transcription factor 75 [Juglans regia]
Cyclocarya_paliurus_newGene_23889	0	0	0	50	181	50	0	0	0	0.52701	1.99481	0.626454	0.000196190858748971	5.32622404923058	up	[J]	Translation, ribosomal structure and biogenesis	Biological Process: tRNA modification (GO:0006400);; Molecular Function: methylthiotransferase activity (GO:0035596);; Molecular Function: 4 iron, 4 sulfur cluster binding (GO:0051539);;	K14441|1.7e-37|gsl:Gasu_36360|K14441 ribosomal protein S12 methylthiotransferase [EC:2.8.4.4] | (RefSeq) hypothetical protein	--	[T]	Signal transduction mechanisms	Radical SAM superfamily	CDK5RAP1-like protein OS=Arabidopsis thaliana OX=3702 GN=At4g36390 PE=2 SV=1	T	Signal transduction mechanisms	hypothetical protein F2P56_024158, partial [Juglans regia]
Cyclocarya_paliurus_newGene_5186	0	0	0	80	102	53	0	0	0	2.53554	3.31448	1.99595	0.000197539390592947	5.31004382448308	up	--	--	Molecular Function: molecular_function (GO:0003674);; Molecular Function: nucleic acid binding (GO:0003676);; Molecular Function: RNA binding (GO:0003723);; Molecular Function: binding (GO:0005488);; Biological Process: multicellular organism development (GO:0007275);; Biological Process: determination of left/right symmetry (GO:0007368);; Biological Process: pattern specification process (GO:000…	--	--	--	--	--	--	A	RNA processing and modification	uncharacterized protein LOC108999975 [Juglans regia]
Cyclocarya_paliurus_newGene_36258	0	0	0	35	312	39	0	0	0	1.438	6.31443	1.91413	0.000225697062558334	5.30556513349943	up	--		Molecular Function: protein kinase activity (GO:0004672);; Molecular Function: calcium ion binding (GO:0005509);; Molecular Function: ATP binding (GO:0005524);; Cellular Component: integral component of membrane (GO:0016021);; Molecular Function: polysaccharide binding (GO:0030247);;	K23544|2.4e-92|brp:103842861|K23544 serine incorporator 1/3 | (RefSeq) serine incorporator 3	--	--	--	Protein kinase domain	Wall-associated receptor kinase 5 OS=Arabidopsis thaliana OX=3702 GN=WAK5 PE=2 SV=1	T	Signal transduction mechanisms	putative wall-associated receptor kinase-like 16 [Juglans regia]
Cyclocarya_paliurus_newGene_37151	0	0	0	36	147	76	0	0	0	0.67966	3.11213	1.74496	0.000210837772632329	5.30090683705546	up	--	--	Molecular Function: polysaccharide binding (GO:0030247);;	--	--	--	--	Wall-associated receptor kinase galacturonan-binding	--	T	Signal transduction mechanisms	uncharacterized protein LOC108982245 [Juglans regia]
Cyclocarya_paliurus_newGene_7459	0	0	0	99	102	40	0	0	0	1.4698	1.56341	0.714425	0.000207352450606041	5.2974102180385	up	[QV]	Secondary metabolites biosynthesis, transport and catabolism;; Defense mechanisms	Molecular Function: monooxygenase activity (GO:0004497);; Molecular Function: iron ion binding (GO:0005506);; Cellular Component: integral component of membrane (GO:0016021);; Molecular Function: oxidoreductase activity, acting on paired donors, with incorporation or reduction of molecular oxygen (GO:0016705);; Molecular Function: heme binding (GO:0020037);;	K20770|4.8e-142|gab:108483715|K20770 (+)-delta-cadinene 8-hydroxylase [EC:1.14.-.-] | (RefSeq) flavonoid 3'-monooxygenase-like	--	[Q]	Secondary metabolites biosynthesis, transport and catabolism	Cytochrome P450	Flavonoid 3'-monooxygenase CYP75B137 OS=Crocosmia x crocosmiiflora OX=1053288 GN=CYP75B137 PE=1 SV=1	Q	Secondary metabolites biosynthesis, transport and catabolism	flavonoid 3'-monooxygenase CYP75B137-like isoform X1 [Juglans regia]
Cyclocarya_paliurus_newGene_38162	0	0	0	29	40	413	0	0	0	0.388916	0.556202	6.7495	0.000256344624835235	5.28369141223409	up	[O]	Posttranslational modification, protein turnover, chaperones	Molecular Function: electron carrier activity (GO:0009055);; Molecular Function: protein disulfide oxidoreductase activity (GO:0015035);;	K07390|1.5e-23|peq:110033081|K07390 monothiol glutaredoxin | (RefSeq) monothiol glutaredoxin-S7, chloroplastic	--	[O]	Posttranslational modification, protein turnover, chaperones	Glutaredoxin	Bifunctional monothiol glutaredoxin-S16, chloroplastic OS=Arabidopsis thaliana OX=3702 GN=GRXS16 PE=1 SV=2	O	Posttranslational modification, protein turnover, chaperones	bifunctional monothiol glutaredoxin-S16, chloroplastic [Juglans regia]
Cyclocarya_paliurus_newGene_12967	0	0	0	52	60	110	0	0	0	1.35034	1.61094	3.43277	0.000231597636001437	5.26400013806182	up	--	--	Molecular Function: transcription factor activity, sequence-specific DNA binding (GO:0003700);; Cellular Component: nucleus (GO:0005634);; Molecular Function: sequence-specific DNA binding (GO:0043565);;	K13424|3.5e-26|ini:109173777|K13424 WRKY transcription factor 33 | (RefSeq) probable WRKY transcription factor 26	MAPK signaling pathway - plant (ko04016);; Plant-pathogen interaction (ko04626)	--	--	WRKY DNA -binding domain	Probable WRKY transcription factor 75 OS=Arabidopsis thaliana OX=3702 GN=WRKY75 PE=1 SV=1	K	Transcription	probable WRKY transcription factor 75 [Juglans regia]
Cyclocarya_paliurus_newGene_4381	0	0	0	75	53	87	0	0	0	1.57478	1.35332	2.27242	0.000230253678226839	5.2614349422264	up	[S]	Function unknown	Cellular Component: integral component of membrane (GO:0016021);;	--	--	--	--	Protein of unknown function, DUF599	--	S	Function unknown	uncharacterized protein LOC108996611 [Juglans regia]
Cyclocarya_paliurus_newGene_6120	0	0	0	151	41	54	0	0	0	3.63106	1.11176	1.47829	0.000237087499720503	5.26087401943266	up	--	--	--	--	--	--	--	--	Style cell-cycle inhibitor 1-A OS=Nicotiana tabacum OX=4097 GN=SCI1A PE=2 SV=2	--	--	style cell-cycle inhibitor 1-A [Juglans regia]
Cyclocarya_paliurus_newGene_13790	0	0	0	89	58	65	0	0	0	1.85011	1.41645	1.64162	0.000235111286572197	5.25267170796034	up	--	--	Molecular Function: GTP binding (GO:0005525);;	K07950|7.1e-26|jre:109005099|K07950 ADP-ribosylation factor-like protein 5B | (RefSeq) ADP-ribosylation factor-like protein 5	--	[U]	Intracellular trafficking, secretion, and vesicular transport	ADP-ribosylation factor family	ADP-ribosylation factor 1 OS=Arabidopsis thaliana OX=3702 GN=ARF1 PE=1 SV=2	U	Intracellular trafficking, secretion, and vesicular transport	hypothetical protein F2P56_027717, partial [Juglans regia]
Cyclocarya_paliurus_newGene_4649	0	0	0	142	58	38	0	0	0	1.25145	0.514637	0.391634	0.00024629882883103	5.2464463008196	up	[C]	Energy production and conversion	Biological Process: nitric oxide biosynthetic process (GO:0006809);; Molecular Function: heme binding (GO:0020037);; Molecular Function: molybdenum ion binding (GO:0030151);; Biological Process: nitrate assimilation (GO:0042128);; Molecular Function: molybdopterin cofactor binding (GO:0043546);; Molecular Function: nitrate reductase (NADPH) activity (GO:0050464);;	K10534|0.0e+00|jre:109006417|K10534 nitrate reductase (NAD(P)H) [EC:1.7.1.1 1.7.1.2 1.7.1.3] | (RefSeq) nitrate reductase [NAD(P)H]-like	Nitrogen metabolism (ko00910)	[C]	Energy production and conversion	Oxidoreductase molybdopterin binding domain	Nitrate reductase [NAD(P)H] OS=Betula pendula OX=3505 GN=NIA1 PE=2 SV=1	C	Energy production and conversion	nitrate reductase [NAD(P)H]-like [Juglans regia]
Cyclocarya_paliurus_newGene_8150	0	0	0	71	64	63	0	0	0	1.65739	1.86639	1.79165	0.000262393233900214	5.21559577141312	up	--	--	Cellular Component: ubiquitin ligase complex (GO:0000151);; Molecular Function: molecular_function (GO:0003674);; Molecular Function: binding (GO:0005488);; Molecular Function: protein binding (GO:0005515);; Cellular Component: cellular_component (GO:0005575);; Cellular Component: intracellular (GO:0005622);; Cellular Component: cell (GO:0005623);; Cellular Component: cytoplasm (GO:0005737);; Bio…	K10523|3.3e-107|jre:108985744|K10523 speckle-type POZ protein | (RefSeq) BTB/POZ domain-containing protein At1g55760-like	--	[DR]	Cell cycle control, cell division, chromosome partitioning;; General function prediction only	BTB/POZ domain	BTB/POZ domain-containing protein At1g55760 OS=Arabidopsis thaliana OX=3702 GN=At1g55760 PE=2 SV=1	D	Cell cycle control, cell division, chromosome partitioning	BTB/POZ domain-containing protein At1g55760-like [Juglans regia]
Cyclocarya_paliurus_newGene_29970	0	0	0	60	82	57	0	0	0	1.26548	1.78675	1.43674	0.000265959365614786	5.21185955989818	up	--	--	Molecular Function: AT DNA binding (GO:0003680);;	--	--	--	--	Plants and Prokaryotes Conserved (PCC) domain	AT-hook motif nuclear-localized protein 23 OS=Arabidopsis thaliana OX=3702 GN=AHL23 PE=1 SV=1	K	Transcription	AT-hook motif nuclear-localized protein 23-like isoform X2 [Juglans regia]
Cyclocarya_paliurus_newGene_24098	0	0	0	56	74	67	0	0	0	1.49219	2.04024	2.11185	0.000267752513909795	5.20986397419748	up	--		Molecular Function: protein kinase activity (GO:0004672);; Molecular Function: ATP binding (GO:0005524);; Cellular Component: integral component of membrane (GO:0016021);;	K24104|2.0e-41|thj:104799061|K24104 GPN-loop GTPase | (RefSeq) LOW QUALITY PROTEIN: uncharacterized protein LOC104799061	--	--	--	Protein kinase domain	Cysteine-rich receptor-like protein kinase 38 OS=Arabidopsis thaliana OX=3702 GN=CRK38 PE=3 SV=1	T	Signal transduction mechanisms	putative receptor-like protein kinase At4g00960 isoform X1 [Juglans regia]
Cyclocarya_paliurus_newGene_7580	0	0	0	31	94	85	0	0	0	0.807298	2.82482	2.77035	0.000287121809916603	5.19621598418265	up	[HR]	Coenzyme transport and metabolism;; General function prediction only	Molecular Function: catalytic activity (GO:0003824);;	--	--	--	--	Isochorismatase family	Nicotinamidase 1 OS=Arabidopsis thaliana OX=3702 GN=NIC1 PE=1 SV=1	Q	Secondary metabolites biosynthesis, transport and catabolism	nicotinamidase 1-like [Juglans regia]
Cyclocarya_paliurus_newGene_15123	0	0	0	84	50	61	0	0	0	1.19261	0.713579	1.01643	0.00028270465554464	5.19247467086635	up	[C]	Energy production and conversion	Biological Process: cytokinin metabolic process (GO:0009690);; Cellular Component: integral component of membrane (GO:0016021);; Molecular Function: cytokinin dehydrogenase activity (GO:0019139);; Molecular Function: FAD binding (GO:0071949);;	K00279|4.2e-303|jre:109009322|K00279 cytokinin dehydrogenase [EC:1.5.99.12] | (RefSeq) cytokinin dehydrogenase 3-like	Zeatin biosynthesis (ko00908)	[C]	Energy production and conversion	Cytokinin dehydrogenase 1, FAD and cytokinin binding	Cytokinin dehydrogenase 3 OS=Arabidopsis thaliana OX=3702 GN=CKX3 PE=1 SV=1	C	Energy production and conversion	cytokinin dehydrogenase 3-like [Juglans regia]
Cyclocarya_paliurus_newGene_3966	0	0	0	61	58	69	0	0	0	1.11275	1.09431	1.50507	0.000292462963373807	5.1805307371023	up	--	--	Molecular Function: nucleic acid binding (GO:0003676);; Molecular Function: aspartic-type endopeptidase activity (GO:0004190);; Biological Process: DNA integration (GO:0015074);;	K19199|1.3e-104|jre:108998805|K19199 protein-histidine N-methyltransferase [EC:2.1.1.85] | (RefSeq) uncharacterized protein LOC108998805 isoform X1	--	[R]	General function prediction only	RNase H-like domain found in reverse transcriptase	Uncharacterized mitochondrial protein AtMg00860 OS=Arabidopsis thaliana OX=3702 GN=AtMg00860 PE=4 SV=1	L	Replication, recombination and repair	Transposon Tf2-12 polyprotein [Vitis vinifera]
Cyclocarya_paliurus_newGene_1709	0	0	0	85	90	30	0	0	0	1.34704	1.32983	0.752759	0.000302878081388862	5.1743558457834	up	--	--	Molecular Function: GTPase activity (GO:0003924);; Molecular Function: signal recognition particle binding (GO:0005047);; Molecular Function: GTP binding (GO:0005525);; Cellular Component: signal recognition particle receptor complex (GO:0005785);; Biological Process: SRP-dependent cotranslational protein targeting to membrane (GO:0006614);;	K13431|2.5e-135|jre:109020615|K13431 signal recognition particle receptor subunit alpha | (RefSeq) signal recognition particle receptor subunit alpha homolog	Protein export (ko03060)	[U]	Intracellular trafficking, secretion, and vesicular transport	Signal recognition particle, alpha subunit, N-terminal	--	U	Intracellular trafficking, secretion, and vesicular transport	signal recognition particle receptor subunit alpha homolog [Juglans regia]
Cyclocarya_paliurus_newGene_4157	0	0	0	52	125	33	0	0	0	1.6207	4.03601	1.22105	0.000315214635647844	5.16523135134633	up	--	--	Biological Process: defense response (GO:0006952);;	--	--	--	--	Pathogenesis-related protein Bet v 1 family	MLP-like protein 43 OS=Arabidopsis thaliana OX=3702 GN=MLP43 PE=1 SV=1	S	Function unknown	MLP-like protein 43 isoform X2 [Juglans regia]
Cyclocarya_paliurus_newGene_28242	0	0	0	50	112	37	0	0	0	1.04042	2.41186	0.926835	0.000323560040060161	5.1535134288749	up	--	--	Molecular Function: methyltransferase activity (GO:0008168);; Biological Process: methylation (GO:0032259);;	K22546|1.6e-53|ath:AT3G44860|K22546 juvenile hormone-III synthase [EC:2.1.1.325] | (RefSeq) FAMT; farnesoic acid carboxyl-O-methyltransferase	--	--	--	SAM dependent carboxyl methyltransferase	Loganic acid O-methyltransferase OS=Catharanthus roseus OX=4058 GN=LAMT PE=1 SV=1	S	Function unknown	loganic acid O-methyltransferase-like [Juglans regia]
Cyclocarya_paliurus_newGene_2447	19	0	0	1754	1977	1347	0.28421	0	0	38.1162	43.2975	34.1565	0.000312307330013307	5.15167740007195	up	--	--	--	--	--	--	--	--	Pathogen-related protein OS=Hordeum vulgare OX=4513 PE=2 SV=2	S	Function unknown	pathogen-related protein-like [Juglans regia]
Cyclocarya_paliurus_newGene_2089	0	0	0	84	54	47	0	0	0	2.03648	2.46293	2.49771	0.000320553961265829	5.1504266070312	up	--	--	--	--	--	--	--	Mature-T-Cell Proliferation I type	--	T	Signal transduction mechanisms	cx9C motif-containing protein 4 [Juglans regia]
Cyclocarya_paliurus_newGene_12447	41	0	0	6602	7989	5715	0.690571	0	0	87.2552	109.065	91.2838	0.000376315291761512	5.1460815376299	up	[T]	Signal transduction mechanisms	Molecular Function: protein kinase activity (GO:0004672);; Molecular Function: calcium ion binding (GO:0005509);; Molecular Function: ATP binding (GO:0005524);; Cellular Component: integral component of membrane (GO:0016021);; Molecular Function: polysaccharide binding (GO:0030247);;	K23544|3.0e-113|brp:103842861|K23544 serine incorporator 1/3 | (RefSeq) serine incorporator 3	--	--	--	Protein kinase domain	Wall-associated receptor kinase 2 OS=Arabidopsis thaliana OX=3702 GN=WAK2 PE=1 SV=1	T	Signal transduction mechanisms	wall-associated receptor kinase 2-like [Juglans regia]
Cyclocarya_paliurus_newGene_36427	0	0	0	55	58	64	0	0	0	1.11192	1.22337	1.60352	0.000330562582763626	5.13953012195293	up	--	--	--	--	--	--	--	No apical meristem-associated C-terminal domain	--	--	--	glutathione S-transferase T3-like [Juglans regia]
qql_120850	0	0	0	84	46	52	0	0	0	5.19458	2.92959	3.81083	0.000333319432237049	5.13801177527936	up	--	--	--	--	--	--	--	--	--	--	--	hypothetical protein FH972_025297 [Carpinus fangiana]
Cyclocarya_paliurus_newGene_5063	0	0	0	64	78	40	0	0	0	1.47961	1.62049	1.12188	0.000335027561425588	5.13586974202155	up	--	--	--	--	--	--	--	--	--	--	--	uncharacterized protein LOC109010887 [Juglans regia]
Cyclocarya_paliurus_newGene_24192	4	0	0	222	273	209	0.020507	0	0	1.98948	2.46513	2.70769	0.000249477039787812	5.1287283992029	up	[T]	Signal transduction mechanisms	Molecular Function: protein serine/threonine kinase activity (GO:0004674);; Molecular Function: ATP binding (GO:0005524);; Cellular Component: integral component of membrane (GO:0016021);;	K13428|1.0e-70|ath:AT5G20480|K13428 LRR receptor-like serine/threonine-protein kinase EFR [EC:2.7.11.1] | (RefSeq) EFR; EF-TU receptor	Plant-pathogen interaction (ko04626)	--	--	Leucine rich repeat	Probable LRR receptor-like serine/threonine-protein kinase At3g47570 OS=Arabidopsis thaliana OX=3702 GN=At3g47570 PE=2 SV=1	T	Signal transduction mechanisms	hypothetical protein F2P56_024382 [Juglans regia]
Cyclocarya_paliurus_newGene_17469	0	0	0	69	69	39	0	0	0	0.948804	0.9757	0.882755	0.000352332831252468	5.11853763753915	up	[O]	Posttranslational modification, protein turnover, chaperones	Molecular Function: peptidyl-prolyl cis-trans isomerase activity (GO:0003755);; Biological Process: protein folding (GO:0006457);;	K05864|4.4e-131|jre:108979794|K05864 peptidyl-prolyl isomerase D [EC:5.2.1.8] | (RefSeq) peptidyl-prolyl cis-trans isomerase CYP40-like	--	[O]	Posttranslational modification, protein turnover, chaperones	Cyclophilin type peptidyl-prolyl cis-trans isomerase/CLD	Peptidyl-prolyl cis-trans isomerase CYP40 OS=Arabidopsis thaliana OX=3702 GN=CYP40 PE=2 SV=1	O	Posttranslational modification, protein turnover, chaperones	peptidyl-prolyl cis-trans isomerase CYP40-like [Juglans regia]
Cyclocarya_paliurus_newGene_12050	0	0	0	82	44	51	0	0	0	1.41001	0.625628	0.775525	0.000353718105914277	5.11816052897155	up	--	--	--	--	--	--	--	VQ motif	VQ motif-containing protein 22 OS=Arabidopsis thaliana OX=3702 GN=VQ22 PE=2 SV=1	S	Function unknown	uncharacterized protein LOC108980069 [Juglans regia]
Cyclocarya_paliurus_newGene_6123	0	0	0	61	40	70	0	0	0	0.879953	0.592118	1.21969	0.000371093962555582	5.10303755701312	up	--	--	--	K13944|2.1e-31|adu:107473624|K13944 LOB domain-containing protein 16 | (RefSeq) LOB domain-containing protein 16-like	--	--	--	Lateral organ boundaries (LOB) domain	LOB domain-containing protein 4 OS=Arabidopsis thaliana OX=3702 GN=LBD4 PE=1 SV=1	S	Function unknown	LOB domain-containing protein 4-like [Juglans regia]
Cyclocarya_paliurus_newGene_24644	0	0	0	37	49	90	0	0	0	0.483621	0.674906	1.46198	0.0003782476798482	5.10159049879089	up	--	--	--	--	--	--	--	Plant transposase (Ptta/En/Spm family)	--	--	--	uncharacterized protein LOC108987431 isoform X2 [Juglans regia]
Cyclocarya_paliurus_newGene_26835	0	0	0	69	41	60	0	0	0	1.26217	0.777921	1.31309	0.000373683880948197	5.09953175846908	up	--	--	Molecular Function: regulatory region nucleic acid binding (GO:0001067);; Molecular Function: molecular_function (GO:0003674);; Molecular Function: nucleic acid binding (GO:0003676);; Molecular Function: DNA binding (GO:0003677);; Molecular Function: transcription factor activity, sequence-specific DNA binding (GO:0003700);; Molecular Function: binding (GO:0005488);; Biological Process: regulatio…	K13114|1.0e-28|jre:109007056|K13114 pinin | (RefSeq) pinin	RNA transport (ko03013);; mRNA surveillance pathway (ko03015)	[Z]	Cytoskeleton	--	--	Z	Cytoskeleton	pinin [Juglans regia]
Cyclocarya_paliurus_newGene_29572	4	0	0	328	531	47	0.080831	0	0	11.58	18.5532	2.39947	0.000327346282324129	5.0929781803911	up	--	--	Molecular Function: ATP binding (GO:0005524);; Cellular Component: integral component of membrane (GO:0016021);; Molecular Function: ATPase activity (GO:0016887);;	K05681|1.2e-25|nta:107765868|K05681 ATP-binding cassette, subfamily G (WHITE), member 2 | (RefSeq) ABC transporter G family member 9-like	ABC transporters (ko02010)	[Q]	Secondary metabolites biosynthesis, transport and catabolism	ABC-2 type transporter	ABC transporter G family member 22 OS=Arabidopsis thaliana OX=3702 GN=ABCG22 PE=1 SV=1	Q	Secondary metabolites biosynthesis, transport and catabolism	ABC transporter G family member 22-like isoform X2 [Juglans regia]
Cyclocarya_paliurus_newGene_17224	7	0	0	202	628	443	0.06094	0	0	2.81713	9.69169	7.93267	0.000318640842167497	5.08643226417468	up	[E]	Amino acid transport and metabolism	Biological Process: amino acid transport (GO:0006865);; Cellular Component: integral component of membrane (GO:0016021);; Molecular Function: transmembrane transporter activity (GO:0022857);;	K19564|1.1e-09|qsu:111984493|K19564 choline transport protein | (RefSeq) choline transport protein-like	--	[E]	Amino acid transport and metabolism	Amino acid permease	Amino-acid permease BAT1 OS=Arabidopsis thaliana OX=3702 GN=BAT1 PE=2 SV=2	E	Amino acid transport and metabolism	amino-acid permease BAT1 homolog [Juglans regia]
Cyclocarya_paliurus_newGene_24571	0	0	0	72	35	62	0	0	0	0.418129	0.275107	0.429899	0.000393325211084446	5.08396583118575	up	--	--	Molecular Function: nucleic acid binding (GO:0003676);; Biological Process: DNA integration (GO:0015074);;	K01303|9.6e-69|fve:101311565|K01303 acylaminoacyl-peptidase [EC:3.4.19.1] | (RefSeq) uncharacterized LOC101311565	--	[R]	General function prediction only	RNase H-like domain found in reverse transcriptase	--	L	Replication, recombination and repair	putative nucleotidyltransferase, Ribonuclease H [Rosa chinensis]
Cyclocarya_paliurus_newGene_29026	0	0	0	71	92	22	0	0	0	1.35292	1.78305	0.487101	0.000409555144662299	5.07610742084382	up	--	--	--	--	--	--	--	--	--	--	--	putative nuclease HARBI1 [Juglans regia]
Cyclocarya_paliurus_newGene_35769	0	0	0	54	48	59	0	0	0	1.45969	0.967672	1.35062	0.000402413197180024	5.07319619061463	up	--	--	Molecular Function: nucleic acid binding (GO:0003676);; Molecular Function: zinc ion binding (GO:0008270);; Biological Process: DNA integration (GO:0015074);;	K01768|8.3e-63|ghi:107911085|K01768 adenylate cyclase [EC:4.6.1.1] | (RefSeq) LOW QUALITY PROTEIN: uncharacterized protein LOC107911085	Purine metabolism (ko00230)	[R]	General function prediction only	GAG-pre-integrase domain	Retrovirus-related Pol polyprotein from transposon TNT 1-94 OS=Nicotiana tabacum OX=4097 PE=2 SV=1	O	Posttranslational modification, protein turnover, chaperones	hypothetical protein TSUD_217860 [Trifolium subterraneum]
Cyclocarya_paliurus_newGene_21864	0	0	0	67	112	18	0	0	0	2.64636	4.56672	0.820259	0.00042282672945644	5.07122512429475	up	--	--	Molecular Function: protein phosphatase inhibitor activity (GO:0004864);; Biological Process: defense response (GO:0006952);; Biological Process: abscisic acid-activated signaling pathway (GO:0009738);; Molecular Function: abscisic acid binding (GO:0010427);; Molecular Function: signaling receptor activity (GO:0038023);;	K05387|4.1e-12|peq:110030824|K05387 glutamate receptor, ionotropic, plant | (RefSeq) LOW QUALITY PROTEIN: glutamate receptor 2.3-like	--	--	--	Pathogenesis-related protein Bet v 1 family	Major allergen Pru ar 1 OS=Prunus armeniaca OX=36596 PE=1 SV=1	S	Function unknown	major allergen Pru ar 1-like [Juglans regia]
Cyclocarya_paliurus_newGene_12150	3	0	0	19	323	391	0.023005	0	0	0.203385	3.60275	5.0579	0.000416046888413037	5.04061111046363	up	--	--	Cellular Component: chloroplast (GO:0009507);; Molecular Function: violaxanthin de-epoxidase activity (GO:0046422);;	--	--	--	--	VDE lipocalin domain	--	S	Function unknown	violaxanthin de-epoxidase, chloroplastic [Juglans regia]
Cyclocarya_paliurus_newGene_20935	0	0	0	41	83	37	0	0	0	0.738709	1.5612	0.800871	0.000453706945778166	5.03558618595004	up	--	--	Cellular Component: integral component of membrane (GO:0016021);; Molecular Function: kinase activity (GO:0016301);;	K13466|1.7e-07|vvi:100246778|K13466 EIX receptor 1/2 | (RefSeq) receptor-like protein 12	Plant-pathogen interaction (ko04626)	[R]	General function prediction only	Leucine rich repeat	Receptor-like protein 54 OS=Arabidopsis thaliana OX=3702 GN=RLP54 PE=3 SV=1	A	RNA processing and modification	receptor-like protein 1 isoform X1 [Juglans regia]
Cyclocarya_paliurus_newGene_8160	0	0	0	55	45	43	0	0	0	0.563672	0.477874	0.530967	0.000516146122452303	4.98693781463981	up	--	--	Molecular Function: DNA binding (GO:0003677);; Molecular Function: endonuclease activity (GO:0004519);; Biological Process: DNA repair (GO:0006281);;	K20224|4.0e-68|qsu:112011287|K20224 importin-9 | (RefSeq) importin-9-like	--	[R]	General function prediction only	Endonuclease/Exonuclease/phosphatase family	--	L	Replication, recombination and repair	hypothetical protein CMV_013935 [Castanea mollissima]
Cyclocarya_paliurus_newGene_21137	1	0	0	69	79	67	0.040892	0	0	0.779859	0.784783	0.747606	0.000383393358048669	4.98520624627202	up	--	--	Molecular Function: DNA binding (GO:0003677);; Molecular Function: transcription factor activity, sequence-specific DNA binding (GO:0003700);; Cellular Component: nucleus (GO:0005634);;	K09285|8.2e-128|jre:109003547|K09285 AP2-like factor, ANT lineage | (RefSeq) AP2-like ethylene-responsive transcription factor CRL5 isoform X1	--	--	--	--	AP2-like ethylene-responsive transcription factor ANT OS=Arabidopsis thaliana OX=3702 GN=ANT PE=1 SV=2	K	Transcription	AP2-like ethylene-responsive transcription factor CRL5 isoform X1 [Juglans regia]
Cyclocarya_paliurus_newGene_7513	0	0	0	40	77	29	0	0	0	0.528019	1.07029	0.477746	0.000568145826419443	4.95832828928304	up	[M]	Cell wall/membrane/envelope biogenesis	Molecular Function: protein kinase activity (GO:0004672);; Molecular Function: calcium ion binding (GO:0005509);; Molecular Function: ATP binding (GO:0005524);; Cellular Component: integral component of membrane (GO:0016021);;	K23544|2.8e-91|brp:103842861|K23544 serine incorporator 1/3 | (RefSeq) serine incorporator 3	--	--	--	Protein tyrosine and serine/threonine kinase	Wall-associated receptor kinase 1 OS=Arabidopsis thaliana OX=3702 GN=WAK1 PE=1 SV=2	T	Signal transduction mechanisms	putative wall-associated receptor kinase-like 16 [Juglans regia]
Cyclocarya_paliurus_newGene_14111	13	0	0	718	793	594	0.150466	0	0	12.0306	14.0239	11.8155	0.000485923120187119	4.9554915152814	up	--	--	Molecular Function: catalytic activity (GO:0003824);;	--	--	[V]	Defense mechanisms	Lanthionine synthetase C-like protein	LanC-like protein GCL1 OS=Arabidopsis thaliana OX=3702 GN=GCL1 PE=2 SV=1	V	Defense mechanisms	lanC-like protein GCL1 [Juglans regia]
Cyclocarya_paliurus_newGene_7373	0	0	0	65	59	23	0	0	0	1.546	1.45115	0.654132	0.000573309335850151	4.95504727633763	up	--	--	--	--	--	--	--	--	--	--	--	uncharacterized protein LOC108996591 [Juglans regia]
Cyclocarya_paliurus_newGene_22654	0	0	0	51	45	39	0	0	0	1.03788	0.962172	0.95552	0.000580650733787156	4.94582802627753	up	--	--	Molecular Function: protein serine/threonine phosphatase activity (GO:0004722);;	K19704|1.6e-152|jre:108981387|K19704 protein phosphatase PTC1 [EC:3.1.3.16] | (RefSeq) putative protein phosphatase 2C-like protein 44 isoform X1	--	[T]	Signal transduction mechanisms	Protein phosphatase 2C	Putative protein phosphatase 2C-like protein 44 OS=Arabidopsis thaliana OX=3702 GN=At3g23360 PE=5 SV=1	T	Signal transduction mechanisms	putative protein phosphatase 2C-like protein 44 isoform X2 [Juglans regia]
Cyclocarya_paliurus_newGene_20279	0	0	0	46	58	31	0	0	0	0.577757	0.766338	0.461162	0.000608468294587401	4.93071968360919	up	--	--	Cellular Component: integral component of membrane (GO:0016021);;	--	--	--	--	Nodulin-like	Protein NUCLEAR FUSION DEFECTIVE 4 OS=Arabidopsis thaliana OX=3702 GN=NFD4 PE=3 SV=1	S	Function unknown	protein NUCLEAR FUSION DEFECTIVE 4 [Juglans regia]
Cyclocarya_paliurus_newGene_16236	6	0	0	276	305	221	0.021153	0	0	1.52731	1.74644	1.46783	0.000462435854198817	4.92245853223291	up	--	--	Molecular Function: nucleic acid binding (GO:0003676);; Molecular Function: endonuclease activity (GO:0004519);; Molecular Function: zinc ion binding (GO:0008270);; Biological Process: DNA integration (GO:0015074);;	K03006|2.6e-184|adu:107466525|K03006 DNA-directed RNA polymerase II subunit RPB1 [EC:2.7.7.6] | (RefSeq) LOW QUALITY PROTEIN: DNA-directed RNA polymerase II subunit 1-like	RNA polymerase (ko03020)	[R]	General function prediction only	Reverse transcriptase (RNA-dependent DNA polymerase)	Retrovirus-related Pol polyprotein from transposon TNT 1-94 OS=Nicotiana tabacum OX=4097 PE=2 SV=1	T	Signal transduction mechanisms	Endonuclease [Actinidia chinensis var. chinensis]
Cyclocarya_paliurus_newGene_10033	1	0	0	24	57	141	0.00423	0	0	0.659263	1.6737	4.78966	0.000526920099522597	4.91525281066073	up	--	--	Molecular Function: transcription factor activity, sequence-specific DNA binding (GO:0003700);; Cellular Component: nucleus (GO:0005634);; Cellular Component: host cell nucleus (GO:0042025);; Molecular Function: sequence-specific DNA binding (GO:0043565);;	K09419|7.2e-102|jre:109011524|K09419 heat shock transcription factor, other eukaryote | (RefSeq) heat stress transcription factor B-2a-like	--	[K]	Transcription	HSF-type DNA-binding	Heat stress transcription factor B-1 OS=Arabidopsis thaliana OX=3702 GN=HSFB1 PE=2 SV=2	K	Transcription	heat stress transcription factor B-2a-like [Juglans regia]
Cyclocarya_paliurus_newGene_19666	0	0	0	48	25	58	0	0	0	0.736374	0.361539	1.01545	0.000666918542226394	4.90269004417614	up	--	--	--	K05387|3.9e-07|pxb:103932890|K05387 glutamate receptor, ionotropic, plant | (RefSeq) glutamate receptor 3.2-like	--	[R]	General function prediction only	gag-polypeptide of LTR copia-type	--	L	Replication, recombination and repair	uncharacterized protein LOC108987655 [Juglans regia]
Cyclocarya_paliurus_newGene_29545	16	0	0	1025	610	958	0.267986	0	0	24.7003	14.9307	28.2614	0.000590992785765302	4.9024149767475	up	--	--	Cellular Component: plasma membrane (GO:0005886);; Biological Process: response to nitrate (GO:0010167);; Biological Process: nitrate transport (GO:0015706);; Cellular Component: integral component of membrane (GO:0016021);; Biological Process: nitrate assimilation (GO:0042128);;	--	--	--	--	High-affinity nitrate transporter accessory	High-affinity nitrate transporter 3.2 OS=Arabidopsis thaliana OX=3702 GN=NRT3.2 PE=2 SV=1	S	Function unknown	high-affinity nitrate transporter 3.2-like [Juglans regia]
Cyclocarya_paliurus_newGene_33105	1	0	0	263	20	23	5.5e-05	0	0	8.62092	0.658597	0.902847	0.000611529551819404	4.90186208863216	up	--	--	Molecular Function: protein phosphatase inhibitor activity (GO:0004864);; Biological Process: defense response (GO:0006952);; Biological Process: response to biotic stimulus (GO:0009607);; Biological Process: abscisic acid-activated signaling pathway (GO:0009738);; Molecular Function: abscisic acid binding (GO:0010427);; Molecular Function: signaling receptor activity (GO:0038023);;	K05387|5.7e-14|peq:110030824|K05387 glutamate receptor, ionotropic, plant | (RefSeq) LOW QUALITY PROTEIN: glutamate receptor 2.3-like	--	--	--	Pathogenesis-related protein Bet v 1 family	Major allergen Pru ar 1 OS=Prunus armeniaca OX=36596 PE=1 SV=1	S	Function unknown	major allergen Pru ar 1-like [Juglans regia]
Cyclocarya_paliurus_newGene_20119	9	0	0	559	507	226	0.031151	0	0	2.8326	2.86323	1.39712	0.000536159568096839	4.89953162459561	up	--	--	Molecular Function: UDP-glycosyltransferase activity (GO:0008194);;	K22950|9.1e-137|fve:101295404|K22950 acylphloroglucinol glucosyltransferase [EC:2.4.1.358] | (RefSeq) anthocyanidin 3-O-glucosyltransferase 2-like	--	[GC]	Carbohydrate transport and metabolism;; Energy production and conversion	UDP-glucoronosyl and UDP-glucosyl transferase	UDP-glycosyltransferase 71K1 OS=Malus domestica OX=3750 GN=UGT71K1 PE=1 SV=1	--	--	UDP-glycosyltransferase 71K1-like [Juglans regia]
Cyclocarya_paliurus_newGene_33854	0	0	0	42	54	32	0	0	0	0.429564	0.574876	0.39602	0.000665691478256502	4.89862526522986	up	[P]	Inorganic ion transport and metabolism	Molecular Function: calcium-transporting ATPase activity (GO:0005388);; Molecular Function: ATP binding (GO:0005524);; Cellular Component: integral component of membrane (GO:0016021);;	K01537|0.0e+00|jre:108989438|K01537 P-type Ca2+ transporter type 2C [EC:7.2.2.10] | (RefSeq) putative calcium-transporting ATPase 13, plasma membrane-type	--	[P]	Inorganic ion transport and metabolism	Cation transporting ATPase, C-terminus	Putative calcium-transporting ATPase 13, plasma membrane-type OS=Arabidopsis thaliana OX=3702 GN=ACA13 PE=3 SV=1	P	Inorganic ion transport and metabolism	putative calcium-transporting ATPase 13, plasma membrane-type [Juglans regia]
Cyclocarya_paliurus_newGene_19435	0	0	0	39	37	49	0	0	0	1.05065	1.03973	1.59114	0.000675075604425127	4.8942937530038	up	[M]	Cell wall/membrane/envelope biogenesis	Molecular Function: protein serine/threonine kinase activity (GO:0004674);; Molecular Function: ATP binding (GO:0005524);; Cellular Component: integral component of membrane (GO:0016021);;	K13420|6.3e-134|qsu:112038753|K13420 LRR receptor-like serine/threonine-protein kinase FLS2 [EC:2.7.11.1] | (RefSeq) putative receptor-like protein kinase At3g47110	MAPK signaling pathway - plant (ko04016);; Plant-pathogen interaction (ko04626)	--	--	Protein kinase domain	Probable LRR receptor-like serine/threonine-protein kinase At3g47570 OS=Arabidopsis thaliana OX=3702 GN=At3g47570 PE=2 SV=1	T	Signal transduction mechanisms	hypothetical protein F2P56_014122 [Juglans regia]
Cyclocarya_paliurus_newGene_4606	0	0	0	15	80	49	0	0	0	0.248238	1.47395	1.03643	0.00071006735505951	4.89005412223548	up	--	--	Cellular Component: integral component of membrane (GO:0016021);; Molecular Function: transmembrane transporter activity (GO:0022857);;	K17500|1.8e-61|nto:104085001|K17500 integrin-linked kinase-associated serine/threonine phosphatase 2C [EC:3.1.3.16] | (RefSeq) WAT1-related protein At3g18200 isoform X1	--	--	--	EamA-like transporter family	WAT1-related protein At4g08290 OS=Arabidopsis thaliana OX=3702 GN=At4g08290 PE=2 SV=1	S	Function unknown	WAT1-related protein At4g08290 [Juglans regia]
Cyclocarya_paliurus_newGene_27826	0	0	0	20	47	66	0	0	0	0.372721	0.923822	1.51668	0.000703016041491526	4.88874145759693	up	--	--	Molecular Function: ADP binding (GO:0043531);;	K15042|1.1e-23|cit:102625791|K15042 importin subunit alpha-6/7 | (RefSeq) importin subunit alpha-1a-like	--	--	--	--	--	T	Signal transduction mechanisms	disease resistance protein At4g27190-like isoform X1 [Juglans regia]
Cyclocarya_paliurus_newGene_18452	0	0	0	71	37	23	0	0	0	2.28399	1.17603	0.839889	0.000732300198421986	4.8692144039524	up	[QV]	Secondary metabolites biosynthesis, transport and catabolism;; Defense mechanisms	Molecular Function: monooxygenase activity (GO:0004497);; Molecular Function: iron ion binding (GO:0005506);; Cellular Component: integral component of membrane (GO:0016021);; Molecular Function: oxidoreductase activity, acting on paired donors, with incorporation or reduction of molecular oxygen (GO:0016705);; Molecular Function: heme binding (GO:0020037);;	K04123|3.9e-111|jre:108989523|K04123 ent-kaurenoic acid monooxygenase [EC:1.14.14.107] | (RefSeq) ent-kaurenoic acid oxidase 1-like	Diterpenoid biosynthesis (ko00904)	[QI]	Secondary metabolites biosynthesis, transport and catabolism;; Lipid transport and metabolism	Cytochrome P450	Ent-kaurenoic acid oxidase 1 OS=Arabidopsis thaliana OX=3702 GN=KAO1 PE=1 SV=1	Q	Secondary metabolites biosynthesis, transport and catabolism	ent-kaurenoic acid oxidase 1-like [Juglans regia]
Cyclocarya_paliurus_newGene_12621	0	0	0	71	50	16	0	0	0	1.36013	0.858144	0.277148	0.000745746347332011	4.86647060362487	up	--	--	--	--	--	--	--	Domain of unknown function (DUF569)	--	S	Function unknown	uncharacterized protein LOC108992770 [Juglans regia]
Cyclocarya_paliurus_newGene_27027	11	0	0	595	439	436	0.167435	0	0	13.7612	10.0019	12.3974	0.000614713527500061	4.85480975740541	up	--	--	Cellular Component: integral component of membrane (GO:0016021);; Molecular Function: kinase activity (GO:0016301);;	--	--	[R]	General function prediction only	Leucine rich repeat	Receptor-like protein 53 OS=Arabidopsis thaliana OX=3702 GN=RLP53 PE=3 SV=1	A	RNA processing and modification	receptor like protein 21-like [Juglans regia]
Cyclocarya_paliurus_newGene_26345	8	0	0	295	423	274	0.053285	0	0	3.80928	5.39396	4.01484	0.00060642836847886	4.84002570360699	up	--	--	--	--	--	--	--	ACT domain	ACT domain-containing protein ACR2 OS=Arabidopsis thaliana OX=3702 GN=ACR2 PE=4 SV=1	S	Function unknown	hypothetical protein F2P56_026200, partial [Juglans regia]
Cyclocarya_paliurus_newGene_7694	106	0	0	39638	27081	11542	3.14834	0	0	1596.01	1127.59	557.243	0.00100341095401751	4.83087621316956	up	--	--	Molecular Function: molecular_function (GO:0003674);; Molecular Function: binding (GO:0005488);; Molecular Function: copper ion binding (GO:0005507);; Biological Process: cellular ion homeostasis (GO:0006873);; Biological Process: cellular metal ion homeostasis (GO:0006875);; Biological Process: cellular copper ion homeostasis (GO:0006878);; Biological Process: biological_process (GO:0008150);; M…	--	--	--	--	--	Metallothionein-like protein type 3 OS=Carica papaya OX=3649 PE=3 SV=1	S	Function unknown	hypothetical protein CMV_017026 [Castanea mollissima]
Cyclocarya_paliurus_newGene_4592	0	0	0	16	35	77	0	0	0	0.296516	0.675337	1.72062	0.000852561382821018	4.82567291644953	up	--	--	Molecular Function: hydrolase activity, acting on ester bonds (GO:0016788);;	K01206|7.0e-59|ath:AT1G67830|K01206 alpha-L-fucosidase [EC:3.2.1.51] | (RefSeq) FXG1; alpha-fucosidase 1	Other glycan degradation (ko00511)	--	--	GDSL-like Lipase/Acylhydrolase	GDSL esterase/lipase At5g14450 OS=Arabidopsis thaliana OX=3702 GN=At5g14450 PE=2 SV=1	S	Function unknown	GDSL esterase/lipase At3g27950-like [Juglans regia]
Cyclocarya_paliurus_newGene_7351	93	0	0	11661	16427	9938	0.988238	0	0	168.049	243.66	171.692	0.00108783396680983	4.78333203785009	up	[QV]	Secondary metabolites biosynthesis, transport and catabolism;; Defense mechanisms	Molecular Function: monooxygenase activity (GO:0004497);; Molecular Function: iron ion binding (GO:0005506);; Cellular Component: integral component of membrane (GO:0016021);; Molecular Function: oxidoreductase activity, acting on paired donors, with incorporation or reduction of molecular oxygen (GO:0016705);; Molecular Function: heme binding (GO:0020037);;	K20770|4.2e-146|gab:108483715|K20770 (+)-delta-cadinene 8-hydroxylase [EC:1.14.-.-] | (RefSeq) flavonoid 3'-monooxygenase-like	--	[Q]	Secondary metabolites biosynthesis, transport and catabolism	Cytochrome P450	Flavonoid 3'-monooxygenase CYP75B137 OS=Crocosmia x crocosmiiflora OX=1053288 GN=CYP75B137 PE=1 SV=1	Q	Secondary metabolites biosynthesis, transport and catabolism	flavonoid 3'-monooxygenase CYP75B137-like [Juglans regia]
Cyclocarya_paliurus_newGene_4982	0	0	0	20	55	37	0	0	0	0.344333	0.978797	0.813662	0.000941731607099155	4.77925927531441	up	[G]	Carbohydrate transport and metabolism	Molecular Function: trehalose-phosphatase activity (GO:0004805);; Biological Process: trehalose biosynthetic process (GO:0005992);;	K01087|7.6e-136|jre:108982659|K01087 trehalose 6-phosphate phosphatase [EC:3.1.3.12] | (RefSeq) probable trehalose-phosphate phosphatase C	Starch and sucrose metabolism (ko00500)	[G]	Carbohydrate transport and metabolism	Trehalose-phosphatase	Probable trehalose-phosphate phosphatase 2 OS=Oryza sativa subsp. japonica OX=39947 GN=TPP2 PE=1 SV=1	G	Carbohydrate transport and metabolism	probable trehalose-phosphate phosphatase C [Juglans regia]
Cyclocarya_paliurus_newGene_33050	2	0	0	234	44	37	0.037537	0	0	9.65409	1.84997	1.82455	0.000754200178143281	4.77365038593136	up	--	--	Molecular Function: protein phosphatase inhibitor activity (GO:0004864);; Biological Process: defense response (GO:0006952);; Biological Process: response to biotic stimulus (GO:0009607);; Biological Process: abscisic acid-activated signaling pathway (GO:0009738);; Molecular Function: abscisic acid binding (GO:0010427);; Molecular Function: signaling receptor activity (GO:0038023);;	--	--	--	--	Pathogenesis-related protein Bet v 1 family	Major strawberry allergen Fra a 1.07 OS=Fragaria ananassa OX=3747 GN=Fra a 1.07 PE=1 SV=1	J	Translation, ribosomal structure and biogenesis	major allergen Pru ar 1-like [Juglans regia]
Cyclocarya_paliurus_newGene_30816	0	0	0	47	40	21	0	0	0	0.992314	0.868867	0.521472	0.000988012940133733	4.75808833989362	up	--	--	Molecular Function: peroxidase activity (GO:0004601);; Cellular Component: extracellular region (GO:0005576);; Biological Process: response to oxidative stress (GO:0006979);; Molecular Function: heme binding (GO:0020037);; Biological Process: hydrogen peroxide catabolic process (GO:0042744);; Molecular Function: metal ion binding (GO:0046872);;	K00430|3.8e-174|jre:108992318|K00430 peroxidase [EC:1.11.1.7] | (RefSeq) lignin-forming anionic peroxidase-like	Phenylpropanoid biosynthesis (ko00940)	--	--	Peroxidase	Lignin-forming anionic peroxidase OS=Nicotiana sylvestris OX=4096 PE=2 SV=1	Q	Secondary metabolites biosynthesis, transport and catabolism	lignin-forming anionic peroxidase-like [Juglans regia]
Cyclocarya_paliurus_newGene_29931	33	0	0	1611	2580	1580	0.306635	0	0	37.1717	41.6991	36.1029	0.000979395486051301	4.7577325412701	up	[GR]	Carbohydrate transport and metabolism;; General function prediction only	Molecular Function: hydrolase activity (GO:0016787);;	--	--	[R]	General function prediction only	Haloacid dehalogenase-like hydrolase	Haloacid dehalogenase-like hydrolase domain-containing protein Sgpp OS=Arabidopsis thaliana OX=3702 GN=SGPP PE=1 SV=2	S	Function unknown	haloacid dehalogenase-like hydrolase domain-containing protein Sgpp [Juglans regia]
Cyclocarya_paliurus_newGene_16569	0	0	0	41	36	27	0	0	0	0.474805	0.774989	0.365067	0.000996405920696234	4.75313363198724	up	--	--	--	K14007|6.3e-15|jre:109012957|K14007 protein transport protein SEC24 | (RefSeq) protein transport protein Sec24-like At4g32640	Protein processing in endoplasmic reticulum (ko04141)	--	--	--	--	--	--	hypothetical protein F2P56_034026 [Juglans regia]
Cyclocarya_paliurus_newGene_15753	0	0	0	20	58	31	0	0	0	0.37074	1.09457	0.678781	0.00101674184553338	4.75161686436255	up	--	--	Cellular Component: integral component of membrane (GO:0016021);;	K10664|6.2e-200|jre:108990582|K10664 E3 ubiquitin-protein ligase ATL6/9/15/31/42/55 [EC:2.3.2.27] | (RefSeq) RING-H2 finger protein ATL11-like	--	[O]	Posttranslational modification, protein turnover, chaperones	Ring finger domain	E3 ubiquitin-protein ligase ATL6 OS=Arabidopsis thaliana OX=3702 GN=ATL6 PE=1 SV=2	O	Posttranslational modification, protein turnover, chaperones	RING-H2 finger protein ATL11-like [Juglans regia]
Cyclocarya_paliurus_newGene_2174	4	0	0	213	136	95	0.085511	0	0	6.11415	4.00035	3.07201	0.000740541068203388	4.7410744039603	up	--	--	Molecular Function: oxygen transporter activity (GO:0005344);; Molecular Function: oxygen binding (GO:0019825);; Molecular Function: heme binding (GO:0020037);; Molecular Function: metal ion binding (GO:0046872);;	K11968|1.8e-34|dzi:111298175|K11968 ariadne-1 [EC:2.3.2.31] | (RefSeq) probable E3 ubiquitin-protein ligase ARI2 isoform X1	--	[C]	Energy production and conversion	--	Hemoglobin-2 OS=Casuarina glauca OX=3522 GN=HBII PE=3 SV=1	C	Energy production and conversion	plastid division protein PDV2 [Juglans regia]
Cyclocarya_paliurus_newGene_2244	4	0	0	162	305	40	0.039405	0	0	1.71571	3.36511	0.792597	0.000831871413349143	4.73247590376539	up	[I]	Lipid transport and metabolism	Molecular Function: hydrolase activity (GO:0016787);;	--	--	[R]	General function prediction only	alpha/beta hydrolase fold	--	S	Function unknown	hypothetical protein F2P56_029326 [Juglans regia]
Cyclocarya_paliurus_newGene_38116	0	0	0	42	38	22	0	0	0	1.45593	1.33409	0.893678	0.00107485471910772	4.72632739237635	up	--	--	--	--	--	--	--	--	--	--	--	uncharacterized protein LOC108994893 [Juglans regia]
Cyclocarya_paliurus_newGene_34534	0	0	0	24	70	18	0	0	0	0.456971	1.42884	0.405985	0.00110352703535837	4.72541187955937	up	--	--	--	--	--	--	--	Tetratricopeptide repeat	--	S	Function unknown	uncharacterized protein LOC108998357 [Juglans regia]
Cyclocarya_paliurus_newGene_2515	0	0	0	33	32	33	0	0	0	0.424631	0.431244	0.512519	0.00108883494525557	4.72060071646796	up	[P]	Inorganic ion transport and metabolism	Molecular Function: N,N-dimethylaniline monooxygenase activity (GO:0004499);; Molecular Function: flavin adenine dinucleotide binding (GO:0050660);; Molecular Function: NADP binding (GO:0050661);;	K11816|3.6e-17|pvu:PHAVU_007G155200g|K11816 indole-3-pyruvate monooxygenase [EC:1.14.13.168] | (RefSeq) hypothetical protein	Tryptophan metabolism (ko00380)	[Q]	Secondary metabolites biosynthesis, transport and catabolism	Flavin-binding monooxygenase-like	Probable flavin-containing monooxygenase 1 OS=Arabidopsis thaliana OX=3702 GN=FMO1 PE=2 SV=1	Q	Secondary metabolites biosynthesis, transport and catabolism	probable flavin-containing monooxygenase 1 isoform X2 [Juglans regia]
Cyclocarya_paliurus_newGene_6108	2	0	0	90	65	81	0.012898	0	0	0.83516	0.587338	0.839485	0.000774308647980016	4.71755467988097	up	--	--	--	K13944|2.1e-31|adu:107473624|K13944 LOB domain-containing protein 16 | (RefSeq) LOB domain-containing protein 16-like	--	--	--	Lateral organ boundaries (LOB) domain	LOB domain-containing protein 4 OS=Arabidopsis thaliana OX=3702 GN=LBD4 PE=1 SV=1	S	Function unknown	LOB domain-containing protein 4-like [Juglans regia]
Cyclocarya_paliurus_newGene_33164	3	0	0	94	188	56	0.015359	0	0	1.01709	1.97852	0.651067	0.000856108285023961	4.69353021837996	up	--	--	Molecular Function: cysteine-type peptidase activity (GO:0008234);;	K08592|3.2e-143|jre:108983154|K08592 sentrin-specific protease 1 [EC:3.4.22.68] | (RefSeq) ubiquitin-like-specific protease ESD4	--	[O]	Posttranslational modification, protein turnover, chaperones	--	Ubiquitin-like-specific protease ESD4 OS=Arabidopsis thaliana OX=3702 GN=ESD4 PE=1 SV=1	O	Posttranslational modification, protein turnover, chaperones	ubiquitin-like-specific protease ESD4 [Juglans regia]
Cyclocarya_paliurus_newGene_17416	18	0	0	602	969	602	0.317123	0	0	14.4783	24.0761	17.3721	0.00104953109442244	4.68492537442954	up	[IQR]	Lipid transport and metabolism;; Secondary metabolites biosynthesis, transport and catabolism;; General function prediction only	Molecular Function: oxidoreductase activity (GO:0016491);;	K13070|6.8e-71|dosa:Os04t0179200-01|K13070 momilactone-A synthase [EC:1.1.1.295] | (RefSeq) Os04g0179200, MAS, MOMILACTONE_A_SYNTHASE; Similar to Stem secoisolariciresinol dehydrogenase (Fragment).	Diterpenoid biosynthesis (ko00904)	[R]	General function prediction only	Enoyl-(Acyl carrier protein) reductase	Secoisolariciresinol dehydrogenase (Fragment) OS=Podophyllum peltatum OX=35933 PE=1 SV=1	Q	Secondary metabolites biosynthesis, transport and catabolism	secoisolariciresinol dehydrogenase-like [Juglans regia]
Cyclocarya_paliurus_newGene_33102	0	0	0	36	32	25	0	0	0	1.36919	1.24685	1.14758	0.00123546338284723	4.67376514487085	up	--	--	Molecular Function: protein phosphatase inhibitor activity (GO:0004864);; Biological Process: defense response (GO:0006952);; Biological Process: abscisic acid-activated signaling pathway (GO:0009738);; Molecular Function: abscisic acid binding (GO:0010427);; Molecular Function: signaling receptor activity (GO:0038023);;	K05387|2.6e-14|peq:110030824|K05387 glutamate receptor, ionotropic, plant | (RefSeq) LOW QUALITY PROTEIN: glutamate receptor 2.3-like	--	--	--	Pathogenesis-related protein Bet v 1 family	Major allergen Pru ar 1 OS=Prunus armeniaca OX=36596 PE=1 SV=1	S	Function unknown	major allergen Pru ar 1-like [Juglans regia]
Cyclocarya_paliurus_newGene_33041	0	0	0	22	51	23	0	0	0	0.961625	2.38446	1.21471	0.00127546952498874	4.66606193205499	up	--	--	Molecular Function: protein phosphatase inhibitor activity (GO:0004864);; Biological Process: defense response (GO:0006952);; Biological Process: abscisic acid-activated signaling pathway (GO:0009738);; Molecular Function: abscisic acid binding (GO:0010427);; Molecular Function: signaling receptor activity (GO:0038023);;	K05387|3.4e-14|peq:110030824|K05387 glutamate receptor, ionotropic, plant | (RefSeq) LOW QUALITY PROTEIN: glutamate receptor 2.3-like	--	--	--	Pathogenesis-related protein Bet v 1 family	Major allergen Pru ar 1 OS=Prunus armeniaca OX=36596 PE=1 SV=1	S	Function unknown	major allergen Pru ar 1-like [Juglans regia]
Cyclocarya_paliurus_newGene_27815	20	0	0	974	833	597	0.107423	0	0	7.03138	6.20962	5.07854	0.00113092244197644	4.66055754610739	up	[P]	Inorganic ion transport and metabolism	Molecular Function: potassium ion transmembrane transporter activity (GO:0015079);; Cellular Component: integral component of membrane (GO:0016021);;	K03549|0.0e+00|jre:108987116|K03549 KUP system potassium uptake protein | (RefSeq) potassium transporter 6-like	--	--	--	K+ potassium transporter	Potassium transporter 6 OS=Arabidopsis thaliana OX=3702 GN=POT6 PE=2 SV=1	P	Inorganic ion transport and metabolism	potassium transporter 6-like [Juglans regia]
Cyclocarya_paliurus_newGene_22580	0	0	0	21	44	28	0	0	0	0.23225	0.512224	0.367886	0.00128984520970079	4.66052648630837	up	[T]	Signal transduction mechanisms	Molecular Function: protein kinase activity (GO:0004672);; Molecular Function: ATP binding (GO:0005524);; Cellular Component: integral component of membrane (GO:0016021);;	K13415|6.1e-83|obr:102715163|K13415 protein brassinosteroid insensitive 1 [EC:2.7.10.1 2.7.11.1] | (RefSeq) protein BRASSINOSTEROID INSENSITIVE 1-like	Plant hormone signal transduction (ko04075)	--	--	Protein kinase domain	MDIS1-interacting receptor like kinase 2 OS=Arabidopsis thaliana OX=3702 GN=MIK2 PE=1 SV=3	T	Signal transduction mechanisms	MDIS1-interacting receptor like kinase 2-like [Juglans regia]
Cyclocarya_paliurus_newGene_12692	6	0	0	146	259	170	0.080202	0	0	1.91359	3.54033	2.99315	0.000949413982239599	4.65699188494813	up	--	--	Biological Process: signal transduction (GO:0007165);; Molecular Function: ADP binding (GO:0043531);;	K00695|1.2e-94|mtr:MTR_6g478030|K00695 sucrose synthase [EC:2.4.1.13] | (RefSeq) sucrose synthase	Starch and sucrose metabolism (ko00500)	--	--	TIR domain	Disease resistance protein RPV1 OS=Vitis rotundifolia OX=103349 GN=RPV1 PE=1 SV=1	T	Signal transduction mechanisms	hypothetical protein F2P56_036950 [Juglans regia]
Cyclocarya_paliurus_newGene_31088	3	0	0	88	121	92	0.027481	0	0	1.22427	1.88412	1.64173	0.000906361017479876	4.65695632738027	up	--	--	Cellular Component: integral component of membrane (GO:0016021);;	--	--	--	--	Plant protein of unknown function	UPF0481 protein At3g47200 OS=Arabidopsis thaliana OX=3702 GN=At3g47200 PE=2 SV=1	S	Function unknown	hypothetical protein F2P56_014973 [Juglans regia]
Cyclocarya_paliurus_newGene_23504	0	0	0	25	50	20	0	0	0	0.493043	1.07035	0.505771	0.00130609166227711	4.65683497106006	up	[I]	Lipid transport and metabolism	--	K18368|4.3e-158|jre:109003020|K18368 caffeoylshikimate esterase [EC:3.1.1.-] | (RefSeq) caffeoylshikimate esterase-like	Phenylpropanoid biosynthesis (ko00940)	[I]	Lipid transport and metabolism	Serine aminopeptidase, S33	Caffeoylshikimate esterase OS=Arabidopsis thaliana OX=3702 GN=CSE PE=1 SV=1	I	Lipid transport and metabolism	caffeoylshikimate esterase-like [Juglans regia]
Cyclocarya_paliurus_newGene_8559	0	0	0	81	18	13	0	0	0	0.965774	0.438682	0.366521	0.00137952832538883	4.64921897978571	up	--	--	Molecular Function: nucleic acid binding (GO:0003676);; Molecular Function: RNA-DNA hybrid ribonuclease activity (GO:0004523);; Cellular Component: integral component of membrane (GO:0016021);; Molecular Function: cellulose synthase (UDP-forming) activity (GO:0016760);; Biological Process: cellulose biosynthetic process (GO:0030244);; Biological Process: cell wall organization (GO:0071555);;	--	--	--	--	--	--	--	--	uncharacterized protein LOC118347720 [Juglans regia]
Cyclocarya_paliurus_newGene_10681	23	0	0	674	1169	981	0.248173	0	0	10.4723	18.553	18.3582	0.0012165928149931	4.64487525867982	up	--	--	Biological Process: cellular response to phosphate starvation (GO:0016036);;	K24195|2.5e-07|smo:SELMODRAFT_450458|K24195 xenotropic and polytropic retrovirus receptor 1 | (RefSeq) hypothetical protein	--	[P]	Inorganic ion transport and metabolism	SPX domain	SPX domain-containing protein 2 OS=Arabidopsis thaliana OX=3702 GN=SPX2 PE=2 SV=1	P	Inorganic ion transport and metabolism	hypothetical protein F2P56_023137, partial [Juglans regia]
Cyclocarya_paliurus_newGene_7201	1	0	0	70	49	29	0.001187	0	0	1.40622	0.966316	0.621282	0.00101727785255614	4.64101882985664	up	[I]	Lipid transport and metabolism	Molecular Function: iron ion binding (GO:0005506);; Biological Process: lipid biosynthetic process (GO:0008610);; Cellular Component: integral component of membrane (GO:0016021);; Molecular Function: oxidoreductase activity (GO:0016491);;	K15746|3.9e-160|jre:109014502|K15746 beta-carotene 3-hydroxylase [EC:1.14.15.24] | (RefSeq) beta-carotene hydroxylase 2, chloroplastic-like	Carotenoid biosynthesis (ko00906)	--	--	Fatty acid hydroxylase superfamily	Beta-carotene hydroxylase 2, chloroplastic OS=Capsicum annuum OX=4072 GN=CA2 PE=1 SV=2	S	Function unknown	beta-carotene hydroxylase 2, chloroplastic-like [Juglans regia]
Cyclocarya_paliurus_newGene_18031	0	0	0	29	34	24	0	0	0	1.79254	2.16086	1.74691	0.00140339650918358	4.62619887035986	up	--	--	Cellular Component: integral component of membrane (GO:0016021);;	--	--	--	--	--	--	S	Function unknown	hypothetical protein F2P56_010780 [Juglans regia]
Cyclocarya_paliurus_newGene_4858	0	0	0	29	35	23	0	0	0	0.235002	0.295144	0.224819	0.00141360969573206	4.62362959858226	up	--	--	--	--	--	--	--	--	--	--	--	uncharacterized protein LOC109011659 [Juglans regia]
Cyclocarya_paliurus_newGene_27003	122	0	20	3709	3813	3033	0.738805	0	0.14597	30.6764	32.5547	30.0572	0.000911477354005145	4.62008611745358	up	--	--	Molecular Function: DNA binding (GO:0003677);; Cellular Component: nucleus (GO:0005634);;	K12133|0.0e+00|jre:108988289|K12133 MYB-related transcription factor LHY | (RefSeq) protein LHY-like	Circadian rhythm - plant (ko04712)	[O]	Posttranslational modification, protein turnover, chaperones	--	Protein LHY OS=Arabidopsis thaliana OX=3702 GN=LHY PE=1 SV=2	K	Transcription	protein LHY-like [Juglans regia]
Cyclocarya_paliurus_newGene_14142	39	0	0	1910	2180	1522	0.253691	0	0	17.4278	20.4083	16.5182	0.00142618541505131	4.61329526891739	up	--	--	Molecular Function: protein serine/threonine kinase activity (GO:0004674);; Molecular Function: ATP binding (GO:0005524);; Cellular Component: integral component of membrane (GO:0016021);; Molecular Function: carbohydrate binding (GO:0030246);;	--	--	--	--	D-mannose binding lectin	G-type lectin S-receptor-like serine/threonine-protein kinase CES101 OS=Arabidopsis thaliana OX=3702 GN=CES101 PE=2 SV=2	T	Signal transduction mechanisms	G-type lectin S-receptor-like serine/threonine-protein kinase CES101 isoform X2 [Juglans regia]
Cyclocarya_paliurus_newGene_33430	0	0	0	20	54	18	0	0	0	0.373373	0.702547	0.464493	0.00148800074231538	4.61060342998201	up	--	--	Molecular Function: magnesium ion binding (GO:0000287);; Molecular Function: terpene synthase activity (GO:0010333);;	K15803|2.3e-108|jre:109014299|K15803 (-)-germacrene D synthase [EC:4.2.3.75] | (RefSeq) (-)-germacrene D synthase-like	Sesquiterpenoid and triterpenoid biosynthesis (ko00909)	--	--	Terpene synthase family, metal binding domain	Valencene synthase OS=Vitis vinifera OX=29760 GN=ValCS PE=1 SV=1	S	Function unknown	(-)-germacrene D synthase-like [Juglans regia]
Cyclocarya_paliurus_newGene_35471	33	0	0	1566	1571	1215	0.30368	0	0	19.0149	20.0199	16.8822	0.00140411728668201	4.60768322808099	up	--	--	Biological Process: cellular response to phosphate starvation (GO:0016036);;	--	--	[P]	Inorganic ion transport and metabolism	SPX domain	SPX domain-containing protein 2 OS=Arabidopsis thaliana OX=3702 GN=SPX2 PE=2 SV=1	P	Inorganic ion transport and metabolism	hypothetical protein F2P56_017517, partial [Juglans regia]
Cyclocarya_paliurus_newGene_25437	0	0	0	28	15	45	0	0	0	0.618289	0.33131	1.21383	0.00150354462766128	4.60738824338035	up	--	--	Molecular Function: DNA binding (GO:0003677);; Molecular Function: transcription factor activity, sequence-specific DNA binding (GO:0003700);; Cellular Component: nucleus (GO:0005634);;	K09286|6.9e-32|hbr:110645566|K09286 EREBP-like factor | (RefSeq) dehydration-responsive element-binding protein 2C-like	--	--	--	AP2 domain	Dehydration-responsive element-binding protein 2D OS=Arabidopsis thaliana OX=3702 GN=DREB2D PE=2 SV=1	K	Transcription	dehydration-responsive element-binding protein 2D-like [Juglans regia]
Cyclocarya_paliurus_newGene_10126	12	0	0	383	440	318	0.06592	0	0	2.99512	3.57764	2.98912	0.00120445226346992	4.59811007425742	up	[G]	Carbohydrate transport and metabolism	Molecular Function: hydrolase activity, hydrolyzing O-glycosyl compounds (GO:0004553);; Biological Process: carbohydrate metabolic process (GO:0005975);; Molecular Function: carbohydrate binding (GO:0030246);;	K15925|3.9e-16|sly:101248093|K15925 alpha-D-xyloside xylohydrolase [EC:3.2.1.177] | (RefSeq) alpha-xylosidase 1	--	[G]	Carbohydrate transport and metabolism	Glycosyl hydrolases family 31	Putative alpha-xylosidase 2 OS=Arabidopsis thaliana OX=3702 GN=XYL2 PE=5 SV=1	G	Carbohydrate transport and metabolism	sulfoquinovosidase-like [Juglans regia]
Cyclocarya_paliurus_newGene_12598	16	0	0	706	1070	147	0.205047	0	0	12.1506	19.0429	3.02436	0.00143530231071406	4.58004737813671	up	[G]	Carbohydrate transport and metabolism	Molecular Function: aldose 1-epimerase activity (GO:0004034);; Biological Process: hexose metabolic process (GO:0019318);; Molecular Function: carbohydrate binding (GO:0030246);;	K01785|2.6e-200|jre:108985824|K01785 aldose 1-epimerase [EC:5.1.3.3] | (RefSeq) galactose mutarotase-like	Glycolysis / Gluconeogenesis (ko00010);; Galactose metabolism (ko00052)	[G]	Carbohydrate transport and metabolism	Aldose 1-epimerase	--	G	Carbohydrate transport and metabolism	galactose mutarotase-like [Juglans regia]
Cyclocarya_paliurus_newGene_8769	0	0	0	31	34	18	0	0	0	0.317134	0.36248	0.213576	0.0016043014642245	4.57648572537514	up	--	--	--	--	--	--	--	--	--	--	--	uncharacterized protein LOC118344845 [Juglans regia]
Cyclocarya_paliurus_newGene_14112	25	0	0	870	1093	760	0.212307	0	0	10.0149	12.5211	10.2223	0.00152883960855368	4.55326040181628	up	--	--	--	--	--	--	--	--	WEB family protein At3g02930, chloroplastic OS=Arabidopsis thaliana OX=3702 GN=At3g02930 PE=3 SV=1	S	Function unknown	putative WEB family protein At1g65010, chloroplastic [Juglans regia]
Cyclocarya_paliurus_newGene_4397	69	0	0	4895	3644	3375	0.408475	0	0	39.2637	30.2189	32.4563	0.00180542805435824	4.55126932171265	up	[L]	Replication, recombination and repair	Molecular Function: DNA binding (GO:0003677);;	K19036|2.2e-92|boe:106318554|K19036 ATP-dependent RNA/DNA helicase IGHMBP2 [EC:3.6.4.12 3.6.4.13] | (RefSeq) DNA-binding protein SMUBP-2	--	[L]	Replication, recombination and repair	AAA domain	Regulator of nonsense transcripts 1 homolog OS=Arabidopsis thaliana OX=3702 GN=UPF1 PE=1 SV=2	L	Replication, recombination and repair	DNA-binding protein SMUBP-2 [Juglans regia]
Cyclocarya_paliurus_newGene_30224	0	0	0	22	29	27	0	0	0	1.495	1.98346	2.14159	0.00171342103134807	4.55100755311233	up	--	--	Biological Process: signal transduction (GO:0007165);; Molecular Function: ADP binding (GO:0043531);;	K13459|1.8e-15|vvi:100265494|K13459 disease resistance protein RPS2 | (RefSeq) probable disease resistance protein At1g52660	Plant-pathogen interaction (ko04626)	--	--	TIR domain	TMV resistance protein N OS=Nicotiana glutinosa OX=35889 GN=N PE=1 SV=1	S	Function unknown	TMV resistance protein N-like [Juglans regia]
Cyclocarya_paliurus_newGene_12484	11	0	0	305	433	240	0.218495	0	0	8.87338	13.0586	8.38795	0.00134904768730563	4.54939226391022	up	[O]	Posttranslational modification, protein turnover, chaperones	Cellular Component: integral component of membrane (GO:0016021);;	K23051|1.1e-148|jre:109006325|K23051 NAD(P)H-quinone oxidoreductase subunit T, chloroplastic [EC:1.6.5.-] | (RefSeq) NAD(P)H-quinone oxidoreductase subunit T, chloroplastic	--	[O]	Posttranslational modification, protein turnover, chaperones	DnaJ domain	NAD(P)H-quinone oxidoreductase subunit T, chloroplastic OS=Arabidopsis thaliana OX=3702 GN=ndhT PE=1 SV=1	O	Posttranslational modification, protein turnover, chaperones	NAD(P)H-quinone oxidoreductase subunit T, chloroplastic [Juglans regia]
Cyclocarya_paliurus_newGene_5371	38	0	0	420	3180	2408	0.361723	0	0	5.47841	44.6973	40.4191	0.00183576144621578	4.53964682500475	up	[QV]	Secondary metabolites biosynthesis, transport and catabolism;; Defense mechanisms	Molecular Function: molecular_function (GO:0003674);; Molecular Function: catalytic activity (GO:0003824);; Molecular Function: monooxygenase activity (GO:0004497);; Molecular Function: iron ion binding (GO:0005506);; Cellular Component: cellular_component (GO:0005575);; Cellular Component: intracellular (GO:0005622);; Cellular Component: cell (GO:0005623);; Cellular Component: cytoplasm (GO:0005…	K20617|4.9e-190|vvi:100253593|K20617 cytochrome P450 family 71 subfamily A | (RefSeq) cytochrome P450 71A25	--	[Q]	Secondary metabolites biosynthesis, transport and catabolism	Cytochrome P450	Cytochrome P450 736A117 OS=Prunus mume OX=102107 GN=CYP736A117 PE=2 SV=1	Q	Secondary metabolites biosynthesis, transport and catabolism	cytochrome P450 71A24-like [Juglans regia]
Cyclocarya_paliurus_newGene_14273	6	0	0	104	209	182	0.071602	0	0	2.10388	4.43575	4.49905	0.00130213351130609	4.53767683829687	up	[K]	Transcription	Molecular Function: ribonuclease III activity (GO:0004525);; Biological Process: RNA processing (GO:0006396);;	K11592|8.5e-30|bdi:100842689|K11592 endoribonuclease Dicer [EC:3.1.26.-] | (RefSeq) endoribonuclease Dicer homolog 1	--	[A]	RNA processing and modification	Ribonuclease III domain	Ribonuclease 3-like protein 3 OS=Oryza sativa subsp. japonica OX=39947 GN=Os06g0358800 PE=2 SV=1	A	RNA processing and modification	ribonuclease 3-like protein 3 [Juglans regia]
Cyclocarya_paliurus_newGene_35536	2	0	0	59	73	58	0.022419	0	0	0.921069	1.17209	1.05951	0.00125648143979804	4.53437029449053	up	--	--	Biological Process: lipid catabolic process (GO:0016042);; Molecular Function: hydrolase activity (GO:0016787);;	--	--	[I]	Lipid transport and metabolism	--	Patatin-like protein 2 OS=Arabidopsis thaliana OX=3702 GN=PLP2 PE=1 SV=1	I	Lipid transport and metabolism	hypothetical protein F2P56_012467, partial [Juglans regia]
Cyclocarya_paliurus_newGene_7799	10	0	0	113	1192	69	0.127136	0	0	2.04314	22.225	1.48916	0.0017440522211022	4.53099368732934	up	--	--	Molecular Function: zinc ion binding (GO:0008270);;	--	--	--	--	B-box zinc finger	Putative zinc finger protein CONSTANS-LIKE 11 OS=Arabidopsis thaliana OX=3702 GN=COL11 PE=1 SV=2	S	Function unknown	hypothetical protein F2P56_005305 [Juglans regia]
Cyclocarya_paliurus_newGene_11981	0	0	0	22	25	27	0	0	0	0.57852	0.635755	0.821717	0.00188567869548206	4.51411330914052	up	--	--	Molecular Function: structural constituent of ribosome (GO:0003735);; Cellular Component: ribosome (GO:0005840);; Biological Process: translation (GO:0006412);;	K02991|1.1e-07|jre:109011147|K02991 small subunit ribosomal protein S6e | (RefSeq) 40S ribosomal protein S6-like	Ribosome (ko03010)	--	--	--	40S ribosomal protein S6 OS=Asparagus officinalis OX=4686 GN=rps6 PE=2 SV=1	J	Translation, ribosomal structure and biogenesis	40S ribosomal protein S6-like [Juglans regia]
Cyclocarya_paliurus_newGene_25640	19	0	0	656	525	492	0.263995	0	0	14.0357	10.5081	11.6798	0.00179312790674288	4.4670033357403	up	--	--	Molecular Function: purine nucleoside transmembrane transporter activity (GO:0015211);; Cellular Component: integral component of membrane (GO:0016021);;	K00850|4.0e-55|cpap:110822059|K00850 6-phosphofructokinase 1 [EC:2.7.1.11] | (RefSeq) ATP-dependent 6-phosphofructokinase 6-like	Glycolysis / Gluconeogenesis (ko00010);; Pentose phosphate pathway (ko00030);; Fructose and mannose metabolism (ko00051);; Galactose metabolism (ko00052);; Carbon metabolism (ko01200);; Biosynthesis of amino acids (ko01230);; RNA degradation (ko03018)	--	--	Purine nucleobase transmembrane transport	Purine permease 1 OS=Arabidopsis thaliana OX=3702 GN=PUP1 PE=1 SV=1	S	Function unknown	purine permease 1-like [Juglans regia]
Cyclocarya_paliurus_newGene_6119	1	0	0	38	46	31	0.032694	0	0	2.27972	2.8357	2.17731	0.00164123539156242	4.45542585091123	up	--	--	Molecular Function: protein kinase activity (GO:0004672);; Molecular Function: ATP binding (GO:0005524);; Cellular Component: integral component of membrane (GO:0016021);;	--	--	--	--	--	--	T	Signal transduction mechanisms	probable LRR receptor-like serine/threonine-protein kinase At1g56140 isoform X3 [Juglans regia]
Cyclocarya_paliurus_newGene_29110	0	0	0	30	16	23	0	0	0	0.732098	0.392061	0.664929	0.00224662245704399	4.44688893202324	up	--	--	Biological Process: oxidation-reduction process (GO:0055114);;	--	--	[S]	Function unknown	Protein of unknown function (DUF933)	--	S	Function unknown	prostamide/prostaglandin F synthase [Juglans regia]
Cyclocarya_paliurus_newGene_16027	5	0	0	128	217	51	0.056221	0	0	2.20588	3.8845	1.04344	0.00170708368064006	4.43571385359271	up	--	--	Cellular Component: integral component of membrane (GO:0016021);;	--	--	--	--	Uncharacterized protein family, UPF0114	--	S	Function unknown	hypothetical protein F2P56_034121 [Juglans regia]
Cyclocarya_paliurus_newGene_21545	0	0	0	17	29	21	0	0	0	0.388478	0.695451	0.574135	0.00234862543501794	4.42911247964021	up	--	--	Molecular Function: protein serine/threonine kinase activity (GO:0004674);; Molecular Function: ATP binding (GO:0005524);;	--	--	--	--	--	U-box domain-containing protein 33 OS=Arabidopsis thaliana OX=3702 GN=PUB33 PE=2 SV=2	T	Signal transduction mechanisms	hypothetical protein F2P56_026691 [Juglans regia]
Cyclocarya_paliurus_newGene_7002	25	0	1	828	355	351	0.32974	0	5.9e-05	15.0153	6.93117	8.22749	0.00148402763282043	4.42873871685302	up	--	--	Cellular Component: ubiquitin ligase complex (GO:0000151);; Molecular Function: molecular_function (GO:0003674);; Molecular Function: catalytic activity (GO:0003824);; Molecular Function: ubiquitin-protein transferase activity (GO:0004842);; Molecular Function: protein binding (GO:0005515);; Cellular Component: cellular_component (GO:0005575);; Cellular Component: intracellular (GO:0005622);; Cel…	K03875|9.0e-135|jre:108981368|K03875 F-box and leucine-rich repeat protein 1 (S-phase kinase-associated protein 2) | (RefSeq) F-box protein SKP2B-like isoform X1	Ubiquitin mediated proteolysis (ko04120)	[R]	General function prediction only	Leucine Rich repeat	F-box protein SKP2B OS=Arabidopsis thaliana OX=3702 GN=SKP2B PE=1 SV=1	S	Function unknown	F-box protein SKP2B-like isoform X1 [Juglans regia]
Cyclocarya_paliurus_newGene_14796	0	0	0	14	34	20	0	0	0	0.271618	0.756128	0.496593	0.00240312249679521	4.42215551379834	up	--	--	Molecular Function: DNA binding (GO:0003677);; Cellular Component: nucleus (GO:0005634);; Biological Process: regulation of transcription, DNA-templated (GO:0006355);;	K00521|1.8e-43|cmos:111447866|K00521 ferric-chelate reductase [EC:1.16.1.7] | (RefSeq) ferric reduction oxidase 7, chloroplastic-like	--	--	--	No apical meristem (NAM) protein	Transcription factor JUNGBRUNNEN 1 OS=Arabidopsis thaliana OX=3702 GN=JUB1 PE=1 SV=1	K	Transcription	transcription factor JUNGBRUNNEN 1-like [Juglans regia]
Cyclocarya_paliurus_newGene_2731	2	0	0	26	141	27	0.025439	0	0	0.733885	4.58289	0.953776	0.00190179339270368	4.41428230944201	up	--	--	Molecular Function: kinase activity (GO:0016301);;	K13416|5.5e-30|sind:105169199|K13416 brassinosteroid insensitive 1-associated receptor kinase 1 [EC:2.7.10.1 2.7.11.1] | (RefSeq) BRASSINOSTEROID INSENSITIVE 1-associated receptor kinase 1	MAPK signaling pathway - plant (ko04016);; Plant hormone signal transduction (ko04075);; Plant-pathogen interaction (ko04626)	--	--	Leucine rich repeat N-terminal domain	Leucine-rich repeat protein 1 OS=Capsicum annuum OX=4072 GN=LRR1 PE=1 SV=2	T	Signal transduction mechanisms	leucine-rich repeat protein 1-like [Juglans regia]
Cyclocarya_paliurus_newGene_22498	5	0	0	310	46	61	0.054395	0	0	4.50139	0.692774	1.0563	0.00204823442362403	4.38966855754245	up	--	--	Biological Process: protein folding (GO:0006457);; Cellular Component: prefoldin complex (GO:0016272);; Molecular Function: unfolded protein binding (GO:0051082);;	K09549|2.1e-73|jre:109005843|K09549 prefoldin subunit 2 | (RefSeq) probable prefoldin subunit 2	--	[O]	Posttranslational modification, protein turnover, chaperones	Prefoldin subunit	Probable prefoldin subunit 2 OS=Arabidopsis thaliana OX=3702 GN=At3g22480 PE=2 SV=1	O	Posttranslational modification, protein turnover, chaperones	probable prefoldin subunit 2 [Juglans regia]
Cyclocarya_paliurus_newGene_12866	0	0	0	17	17	29	0	0	0	0.354692	0.352427	0.736077	0.00261944373583703	4.38739347510629	up	--	--	Cellular Component: integral component of membrane (GO:0016021);;	K12386|4.4e-74|jre:109008922|K12386 cystinosin | (RefSeq) cystinosin homolog	--	[E]	Amino acid transport and metabolism	PQ loop repeat	Cystinosin homolog OS=Arabidopsis thaliana OX=3702 GN=At5g40670 PE=2 SV=1	E	Amino acid transport and metabolism	hypothetical protein CJ030_MR6G007985 [Morella rubra]
Cyclocarya_paliurus_newGene_33145	5	0	0	72	295	40	0.109576	0	0	1.19552	3.97231	0.40772	0.00208590281962058	4.38141504605721	up	[C]	Energy production and conversion	Molecular Function: transferase activity, transferring acyl groups (GO:0016746);;	K09699|1.5e-186|jre:108987293|K09699 2-oxoisovalerate dehydrogenase E2 component (dihydrolipoyl transacylase) [EC:2.3.1.168] | (RefSeq) lipoamide acyltransferase component of branched-chain alpha-keto acid dehydrogenase complex, mitochondrial	Valine, leucine and isoleucine degradation (ko00280);; Propanoate metabolism (ko00640)	[C]	Energy production and conversion	2-oxoacid dehydrogenases acyltransferase (catalytic domain)	Lipoamide acyltransferase component of branched-chain alpha-keto acid dehydrogenase complex, mitochondrial OS=Arabidopsis thaliana OX=3702 GN=BCE2 PE=1 SV=1	C	Energy production and conversion	lipoamide acyltransferase component of branched-chain alpha-keto acid dehydrogenase complex, mitochondrial [Juglans regia]
Cyclocarya_paliurus_newGene_25472	0	0	0	24	24	15	0	0	0	0.346828	0.350354	0.255612	0.00266704797462928	4.37773028948473	up	--	--	Molecular Function: transferase activity, transferring acyl groups other than amino-acyl groups (GO:0016747);;	K15400|5.2e-68|mtr:MTR_8g096530|K15400 omega-hydroxypalmitate O-feruloyl transferase [EC:2.3.1.188] | (RefSeq) omega-hydroxypalmitate O-feruloyl transferase	Cutin, suberine and wax biosynthesis (ko00073)	--	--	Transferase family	Fatty alcohol:caffeoyl-CoA acyltransferase OS=Arabidopsis thaliana OX=3702 GN=FACT PE=2 SV=1	S	Function unknown	fatty alcohol:caffeoyl-CoA acyltransferase [Juglans regia]
Cyclocarya_paliurus_newGene_8802	41	0	0	1331	1544	1143	0.459259	0	0	20.357	24.5026	20.5292	0.00250060528412748	4.37708448680516	up	[T]	Signal transduction mechanisms	Molecular Function: acid phosphatase activity (GO:0003993);; Molecular Function: metal ion binding (GO:0046872);;	K14379|1.5e-77|jre:108980214|K14379 tartrate-resistant acid phosphatase type 5 [EC:3.1.3.2] | (RefSeq) purple acid phosphatase 17-like	Riboflavin metabolism (ko00740)	[O]	Posttranslational modification, protein turnover, chaperones	Calcineurin-like phosphoesterase	Purple acid phosphatase 17 OS=Arabidopsis thaliana OX=3702 GN=PAP17 PE=2 SV=1	O	Posttranslational modification, protein turnover, chaperones	hypothetical protein F2P56_013314 [Juglans regia]
Cyclocarya_paliurus_newGene_17680	16	0	0	319	594	298	0.244091	0	0	7.23734	13.3945	8.12171	0.00223002013215367	4.36894223117951	up	[R]	General function prediction only	--	K23050|1.6e-128|jre:108991260|K23050 phenylcoumaran benzylic ether reductase [EC:1.3.1.-] | (RefSeq) phenylcoumaran benzylic ether reductase Betv6-like	--	--	--	NmrA-like family	Isoflavone reductase homolog A622-like OS=Nicotiana tabacum OX=4097 GN=A622L PE=2 SV=1	S	Function unknown	phenylcoumaran benzylic ether reductase Betv6-like [Juglans regia]
Cyclocarya_paliurus_newGene_26944	0	0	0	24	16	21	0	0	0	1.20572	0.910335	1.27633	0.00276869366636546	4.3631333316047	up	--	--	Molecular Function: molecular_function (GO:0003674);; Molecular Function: nucleic acid binding (GO:0003676);; Molecular Function: RNA binding (GO:0003723);; Molecular Function: binding (GO:0005488);; Cellular Component: cellular_component (GO:0005575);; Cellular Component: intracellular (GO:0005622);; Cellular Component: cell (GO:0005623);; Cellular Component: nucleus (GO:0005634);; Cellular Comp…	--	--	[R]	General function prediction only	--	Polyadenylate-binding protein-interacting protein 10 OS=Arabidopsis thaliana OX=3702 GN=CID10 PE=2 SV=1	A	RNA processing and modification	Polyadenylate-binding protein-interacting protein 12 [Hibiscus syriacus]
Cyclocarya_paliurus_newGene_15344	111	0	0	8964	9438	1697	0.814426	0	0	88.5103	96.358	20.0425	0.00315774348085339	4.34671618328105	up	--	--	Molecular Function: DNA binding (GO:0003677);; Cellular Component: nucleus (GO:0005634);;	K14491|2.1e-06|mcha:111007438|K14491 two-component response regulator ARR-B family | (RefSeq) two-component response regulator ARR12-like	Plant hormone signal transduction (ko04075)	--	--	Myb-like DNA-binding domain	Transcription factor HHO2 OS=Arabidopsis thaliana OX=3702 GN=HHO2 PE=1 SV=1	K	Transcription	transcription factor HHO3-like [Juglans regia]
Cyclocarya_paliurus_newGene_25637	0	0	0	25	14	21	0	0	0	0.659662	0.353424	0.587746	0.0029013701995799	4.3450300045844	up	--	--	Molecular Function: transferase activity (GO:0016740);;	K00799|2.9e-44|qsu:111997057|K00799 glutathione S-transferase [EC:2.5.1.18] | (RefSeq) glutathione transferase GST 23-like	Glutathione metabolism (ko00480)	[O]	Posttranslational modification, protein turnover, chaperones	Glutathione S-transferase, C-terminal domain	Glutathione transferase GST 23 OS=Zea mays OX=4577 PE=2 SV=1	O	Posttranslational modification, protein turnover, chaperones	LOW QUALITY PROTEIN: glutathione transferase GST 23-like [Juglans regia]
Cyclocarya_paliurus_newGene_34408	36	0	0	1344	1107	781	0.29221	0	0	15.4638	13.3151	10.6076	0.00266511660831757	4.34156334596457	up	--	--	Molecular Function: ATP transmembrane transporter activity (GO:0005347);; Cellular Component: integral component of membrane (GO:0016021);;	K15109|6.3e-126|jre:109003693|K15109 solute carrier family 25 (mitochondrial carnitine/acylcarnitine transporter), member 20/29 | (RefSeq) mitochondrial arginine transporter BAC2-like	--	[C]	Energy production and conversion	Mitochondrial carrier protein	Mitochondrial arginine transporter BAC2 OS=Arabidopsis thaliana OX=3702 GN=BAC2 PE=1 SV=1	C	Energy production and conversion	mitochondrial arginine transporter BAC2-like [Juglans regia]
Cyclocarya_paliurus_newGene_7692	127	0	0	10861	3703	6467	0.790254	0	0	91.0463	32.0335	65.2052	0.00320850395969111	4.3371941381201	up	--	--	--	K10581|1.7e-153|egu:105047412|K10581 ubiquitin-conjugating enzyme E2 O [EC:2.3.2.24] | (RefSeq) uncharacterized protein LOC105047412	Ubiquitin mediated proteolysis (ko04120)	--	--	Protein of unknown function (DUF2921)	--	S	Function unknown	hypothetical protein F2P56_005192 [Juglans regia]
Cyclocarya_paliurus_newGene_26411	0	0	0	16	34	12	0	0	0	0.243519	0.477326	0.191824	0.00300054987379631	4.33393815669842	up	--	--	Biological Process: asymmetric cell division (GO:0008356);;	--	--	--	--	--	--	S	Function unknown	protein POLAR LOCALIZATION DURING ASYMMETRIC DIVISION AND REDISTRIBUTION-like isoform X2 [Juglans regia]
Cyclocarya_paliurus_newGene_16221	8	0	0	213	147	143	0.103589	0	0	3.39563	2.24785	2.53514	0.0022984293995456	4.31175673607755	up	[C]	Energy production and conversion	Molecular Function: molecular_function (GO:0003674);; Molecular Function: binding (GO:0005488);; Molecular Function: protein binding (GO:0005515);; Biological Process: protein folding (GO:0006457);; Molecular Function: protein C-terminus binding (GO:0008022);; Biological Process: biological_process (GO:0008150);; Biological Process: cellular process (GO:0009987);; Molecular Function: Hsp70 protei…	K09553|5.2e-09|cmax:111498373|K09553 stress-induced-phosphoprotein 1 | (RefSeq) hsp70-Hsp90 organizing protein 3-like	--	--	--	Tetratricopeptide repeat	--	S	Function unknown	uncharacterized protein LOC108981612 [Juglans regia]
Cyclocarya_paliurus_newGene_6917	94	0	0	4071	4067	3223	0.209319	0	0	11.4604	12.3389	10.3964	0.00330833042375087	4.30099491014279	up	--	--	--	K20224|1.3e-53|qsu:112011287|K20224 importin-9 | (RefSeq) importin-9-like	--	[R]	General function prediction only	--	--	S	Function unknown	uncharacterized protein LOC118348042 [Juglans regia]
Cyclocarya_paliurus_newGene_36142	9	0	0	203	188	163	0.098109	0	0	3.12644	2.99212	3.01562	0.00241986927930814	4.29448211552429	up	[P]	Inorganic ion transport and metabolism	Biological Process: sulfate assimilation (GO:0000103);; Molecular Function: sulfate adenylyltransferase (ATP) activity (GO:0004781);;	K13811|3.5e-280|jre:109010590|K13811 3'-phosphoadenosine 5'-phosphosulfate synthase [EC:2.7.7.4 2.7.1.25] | (RefSeq) ATP sulfurylase 2-like	Purine metabolism (ko00230);; Monobactam biosynthesis (ko00261);; Selenocompound metabolism (ko00450);; Sulfur metabolism (ko00920)	[P]	Inorganic ion transport and metabolism	ATP-sulfurylase	ATP sulfurylase 2 OS=Arabidopsis thaliana OX=3702 GN=APS2 PE=1 SV=1	P	Inorganic ion transport and metabolism	ATP sulfurylase 2-like [Juglans regia]
Cyclocarya_paliurus_newGene_1894	16	0	0	667	131	382	0.131915	0	0	7.65713	1.55068	5.24941	0.00278334202280697	4.29334700213461	up	[T]	Signal transduction mechanisms	Molecular Function: ATP binding (GO:0005524);; Cellular Component: integral component of membrane (GO:0016021);; Molecular Function: ATPase activity (GO:0016887);;	K21396|3.3e-57|gsl:Gasu_36200|K21396 ATP-binding cassette, subfamily G (WHITE), eye pigment precursor transporter | (RefSeq) ABC transporter, ATP-binding protein	--	[Q]	Secondary metabolites biosynthesis, transport and catabolism	ABC transporter	ABC transporter G family member 11 OS=Arabidopsis thaliana OX=3702 GN=ABCG11 PE=1 SV=1	Q	Secondary metabolites biosynthesis, transport and catabolism	ABC transporter G family member 11-like [Juglans regia]
Cyclocarya_paliurus_newGene_33790	0	0	0	19	15	21	0	0	0	0.181239	0.147091	0.237363	0.00332474207039662	4.28921699833271	up	--	--	--	K13457|6.3e-36|pmum:103334684|K13457 disease resistance protein RPM1 | (RefSeq) disease resistance protein RPM1-like	Plant-pathogen interaction (ko04626)	[R]	General function prediction only	--	--	E	Amino acid transport and metabolism	uncharacterized protein LOC107485985 [Arachis duranensis]
Cyclocarya_paliurus_newGene_30463	1	0	0	17	21	59	0	0	0	0.258953	0.331028	1.10357	0.00266991525031829	4.28607464873264	up	--	--	Molecular Function: AT DNA binding (GO:0003680);; Cellular Component: nucleus (GO:0005634);;	--	--	--	--	Plants and Prokaryotes Conserved (PCC) domain	AT-hook motif nuclear-localized protein 1 OS=Arabidopsis thaliana OX=3702 GN=AHL1 PE=1 SV=1	K	Transcription	AT-hook motif nuclear-localized protein 1-like [Juglans regia]
Cyclocarya_paliurus_newGene_37881	17	0	0	357	411	360	0.16993	0	0	4.99147	6.09458	5.97179	0.0027066568873986	4.28482463111129	up	--	--	Cellular Component: integral component of membrane (GO:0016021);;	K19476|1.3e-89|cic:CICLE_v10026997mg|K19476 vacuolar protein sorting-associated protein IST1 | (RefSeq) hypothetical protein	Endocytosis (ko04144)	[E]	Amino acid transport and metabolism	Transmembrane amino acid transporter protein	Lysine histidine transporter-like 8 OS=Arabidopsis thaliana OX=3702 GN=AATL1 PE=1 SV=1	E	Amino acid transport and metabolism	lysine histidine transporter-like 8 [Juglans regia]
Cyclocarya_paliurus_newGene_3078	37	0	0	444	1649	1369	0.555047	0	0	8.97961	34.5356	33.3135	0.00326487836722392	4.28052470110424	up	--	--	Molecular Function: DNA binding (GO:0003677);; Cellular Component: nucleus (GO:0005634);; Biological Process: regulation of transcription, DNA-templated (GO:0006355);;	K00521|1.1e-41|cmos:111447866|K00521 ferric-chelate reductase [EC:1.16.1.7] | (RefSeq) ferric reduction oxidase 7, chloroplastic-like	--	--	--	No apical meristem (NAM) protein	NAC domain-containing protein 2 OS=Solanum lycopersicum OX=4081 GN=NAP2 PE=2 SV=1	K	Transcription	NAC domain-containing protein 2-like [Juglans regia]
Cyclocarya_paliurus_newGene_18448	15	0	0	599	110	370	0.162883	0	0	6.94918	1.3182	5.14797	0.00286136362399891	4.27997451805994	up	[E]	Amino acid transport and metabolism	Cellular Component: integral component of membrane (GO:0016021);; Molecular Function: transmembrane transporter activity (GO:0022857);;	K14638|0.0e+00|jre:108989540|K14638 solute carrier family 15 (peptide/histidine transporter), member 3/4 | (RefSeq) protein NRT1/ PTR FAMILY 7.2-like	--	[E]	Amino acid transport and metabolism	POT family	Protein NRT1/ PTR FAMILY 7.3 OS=Arabidopsis thaliana OX=3702 GN=NPF7.3 PE=1 SV=2	E	Amino acid transport and metabolism	protein NRT1/ PTR FAMILY 7.2-like [Juglans regia]
Cyclocarya_paliurus_newGene_30154	49	0	0	1451	2364	724	0.48786	0	0	19.6119	33.0385	11.7295	0.00341520719294776	4.25819934455819	up	[QV]	Secondary metabolites biosynthesis, transport and catabolism;; Defense mechanisms	Molecular Function: monooxygenase activity (GO:0004497);; Molecular Function: iron ion binding (GO:0005506);; Cellular Component: integral component of membrane (GO:0016021);; Molecular Function: oxidoreductase activity, acting on paired donors, with incorporation or reduction of molecular oxygen (GO:0016705);; Molecular Function: heme binding (GO:0020037);;	K20619|7.9e-294|jre:108993766|K20619 cytochrome P450 family 78 subfamily A | (RefSeq) cytochrome P450 78A9-like	--	[Q]	Secondary metabolites biosynthesis, transport and catabolism	Cytochrome P450	Cytochrome P450 78A9 OS=Arabidopsis thaliana OX=3702 GN=CYP78A9 PE=1 SV=1	Q	Secondary metabolites biosynthesis, transport and catabolism	cytochrome P450 78A9-like [Juglans regia]
Cyclocarya_paliurus_newGene_5378	70	0	0	2053	2851	1709	0.759113	0	0	32.8603	51.853	33.3141	0.00377089609159422	4.2270185692139	up	[QV]	Secondary metabolites biosynthesis, transport and catabolism;; Defense mechanisms	Molecular Function: monooxygenase activity (GO:0004497);; Molecular Function: iron ion binding (GO:0005506);; Cellular Component: integral component of membrane (GO:0016021);; Molecular Function: oxidoreductase activity, acting on paired donors, with incorporation or reduction of molecular oxygen (GO:0016705);; Molecular Function: heme binding (GO:0020037);;	K20617|5.3e-179|jre:108986006|K20617 cytochrome P450 family 71 subfamily A | (RefSeq) cytochrome P450 71A1-like	--	[Q]	Secondary metabolites biosynthesis, transport and catabolism	Cytochrome P450	Phenylacetaldehyde oxime monooxygenase CYP71AN24 OS=Prunus mume OX=102107 GN=CYP71AN24 PE=1 SV=1	Q	Secondary metabolites biosynthesis, transport and catabolism	cytochrome P450 71A1-like [Juglans regia]
Cyclocarya_paliurus_newGene_9181	30	0	0	766	762	585	0.167854	0	0	5.9392	7.1549	6.2631	0.00337203841511003	4.22486259848697	up	--	--	Cellular Component: integral component of membrane (GO:0016021);;	K20890|6.0e-50|oeu:111370894|K20890 xylan alpha-glucuronosyltransferase [EC:2.4.1.-] | (RefSeq) UDP-glucuronate:xylan alpha-glucuronosyltransferase 1-like	--	[R]	General function prediction only	Domain of unknown function	--	S	Function unknown	ankyrin repeat-containing protein ITN1-like [Juglans regia]
Cyclocarya_paliurus_newGene_20000	14	0	0	260	332	242	0.212639	0	0	3.85626	5.67101	4.47611	0.00302578435508882	4.22478973249066	up	--		Molecular Function: protein kinase activity (GO:0004672);; Molecular Function: ATP binding (GO:0005524);; Cellular Component: integral component of membrane (GO:0016021);; Molecular Function: carbohydrate binding (GO:0030246);;	K01176|2.4e-69|sbi:8065370|K01176 alpha-amylase [EC:3.2.1.1] | (RefSeq) alpha-amylase isozyme 2A	Starch and sucrose metabolism (ko00500)	--	--	Legume lectin domain	Probable L-type lectin-domain containing receptor kinase I.6 OS=Arabidopsis thaliana OX=3702 GN=LECRK16 PE=2 SV=1	T	Signal transduction mechanisms	putative L-type lectin-domain containing receptor kinase II.2 [Juglans regia]
Cyclocarya_paliurus_newGene_33107	7	0	0	371	96	24	0.049298	0	0	3.60039	0.956849	0.26957	0.00351635542327431	4.18760256218835	up	--	--	Molecular Function: protein phosphatase inhibitor activity (GO:0004864);; Biological Process: defense response (GO:0006952);; Biological Process: abscisic acid-activated signaling pathway (GO:0009738);; Molecular Function: abscisic acid binding (GO:0010427);; Molecular Function: signaling receptor activity (GO:0038023);;	--	--	--	--	Pathogenesis-related protein Bet v 1 family	Major allergen Pru ar 1 OS=Prunus armeniaca OX=36596 PE=1 SV=1	S	Function unknown	major allergen Pru ar 1-like [Juglans regia]
qql_118379	21	2	9	412	373	302	0.185157	0.092723	0.094865	4.92913	4.61524	4.33942	0.00116703589242119	4.1807064713914	up	--	--	Cellular Component: photosystem II (GO:0009523);; Biological Process: photosynthetic electron transport in photosystem II (GO:0009772);; Cellular Component: integral component of membrane (GO:0016021);; Molecular Function: chlorophyll binding (GO:0016168);; Biological Process: protein-chromophore linkage (GO:0018298);; Molecular Function: electron transporter, transferring electrons within the cy…	K02705|0.0e+00|nto:108943857|K02705 photosystem II CP43 chlorophyll apoprotein | (RefSeq) uncharacterized protein LOC108943857	Photosynthesis (ko00195)	--	--	Photosystem II protein	Photosystem II CP43 reaction center protein OS=Atropa belladonna OX=33113 GN=psbC PE=3 SV=1	P	Inorganic ion transport and metabolism	photosynthetic reaction centre, L/M, Photosystem antenna protein-like protein, plastid [Artemisia annua]
Cyclocarya_paliurus_newGene_33617	10	0	0	216	255	94	0.095299	0	0	2.96269	3.58709	1.50752	0.00327839607132042	4.17860023327863	up	[E]	Amino acid transport and metabolism	Molecular Function: 3-isopropylmalate dehydratase activity (GO:0003861);; Biological Process: cellular amino acid biosynthetic process (GO:0008652);; Molecular Function: 4 iron, 4 sulfur cluster binding (GO:0051539);;	K01703|1.9e-131|jre:108990554|K01703 3-isopropylmalate/(R)-2-methylmalate dehydratase large subunit [EC:4.2.1.33 4.2.1.35] | (RefSeq) 3-isopropylmalate dehydratase large subunit, chloroplastic-like isoform X1	Valine, leucine and isoleucine biosynthesis (ko00290);; C5-Branched dibasic acid metabolism (ko00660);; Glucosinolate biosynthesis (ko00966);; 2-Oxocarboxylic acid metabolism (ko01210);; Biosynthesis of amino acids (ko01230)	[E]	Amino acid transport and metabolism	Aconitase family (aconitate hydratase)	3-isopropylmalate dehydratase large subunit, chloroplastic OS=Arabidopsis thaliana OX=3702 GN=IIL1 PE=1 SV=1	E	Amino acid transport and metabolism	3-isopropylmalate dehydratase large subunit, chloroplastic-like isoform X2 [Juglans regia]
Cyclocarya_paliurus_newGene_4974	32	0	0	696	838	608	0.342339	0	0	9.83036	12.3711	10.4687	0.00378260395656067	4.17783434037107	up	--	--	Molecular Function: nucleic acid binding (GO:0003676);; Molecular Function: protein kinase activity (GO:0004672);; Molecular Function: ATP binding (GO:0005524);; Biological Process: DNA integration (GO:0015074);;	K13416|9.8e-14|han:110928984|K13416 brassinosteroid insensitive 1-associated receptor kinase 1 [EC:2.7.10.1 2.7.11.1] | (RefSeq) BRASSINOSTEROID INSENSITIVE 1-associated receptor kinase 1-like isoform X1	MAPK signaling pathway - plant (ko04016);; Plant hormone signal transduction (ko04075);; Plant-pathogen interaction (ko04626)	--	--	Protein kinase domain	PR5-like receptor kinase OS=Arabidopsis thaliana OX=3702 GN=PR5K PE=1 SV=1	T	Signal transduction mechanisms	rust resistance kinase Lr10-like [Quercus suber]
Cyclocarya_paliurus_newGene_7644	40	0	0	550	1716	713	0.247783	0	0	4.62694	14.9127	7.19173	0.0041210548425404	4.16406690402673	up	[E]	Amino acid transport and metabolism	Molecular Function: ligand-gated ion channel activity (GO:0015276);; Cellular Component: integral component of membrane (GO:0016021);;	K05387|8.8e-111|atr:18435432|K05387 glutamate receptor, ionotropic, plant | (RefSeq) glutamate receptor 2.7	--	[PET]	Inorganic ion transport and metabolism;; Amino acid transport and metabolism;; Signal transduction mechanisms	Receptor family ligand binding region	Glutamate receptor 2.8 OS=Arabidopsis thaliana OX=3702 GN=GLR2.8 PE=2 SV=2	--	--	glutamate receptor 2.8-like [Juglans regia]
Cyclocarya_paliurus_newGene_7484	9	0	3	224	124	123	0.103936	0	0.027309	3.1782	1.73266	2.105	0.00213509424065255	4.16324922873961	up	[O]	Posttranslational modification, protein turnover, chaperones	Molecular Function: peptidase activity (GO:0008233);;	K01369|8.7e-160|jre:109011344|K01369 legumain [EC:3.4.22.34] | (RefSeq) vacuolar-processing enzyme	--	[O]	Posttranslational modification, protein turnover, chaperones	Peptidase C13 family	Vacuolar-processing enzyme OS=Ricinus communis OX=3988 PE=1 SV=1	O	Posttranslational modification, protein turnover, chaperones	vacuolar-processing enzyme [Juglans regia]
Cyclocarya_paliurus_newGene_5658	8	0	0	68	360	62	0.11129	0	0	1.38868	7.76112	1.49822	0.00361438303496811	4.16128596856497	up	--	--	Molecular Function: DNA binding (GO:0003677);;	K09422|4.9e-120|jre:109014792|K09422 transcription factor MYB, plant | (RefSeq) transcription factor MYB24-like	--	[K]	Transcription	Myb-like DNA-binding domain	Transcription factor MYB62 OS=Arabidopsis thaliana OX=3702 GN=MYB62 PE=2 SV=1	--	--	transcription factor MYB24-like [Juglans regia]
Cyclocarya_paliurus_newGene_20421	59	0	0	1543	1818	1274	0.548621	0	0	18.3512	22.7406	18.9291	0.00427540076147283	4.15881782017648	up	[G]	Carbohydrate transport and metabolism	Molecular Function: UDP-glycosyltransferase activity (GO:0008194);;	K13691|8.1e-255|jre:108992927|K13691 pathogen-inducible salicylic acid glucosyltransferase [EC:2.4.1.-] | (RefSeq) UDP-glycosyltransferase 74F2-like	--	[GC]	Carbohydrate transport and metabolism;; Energy production and conversion	UDP-glucoronosyl and UDP-glucosyl transferase	UDP-glycosyltransferase 74E2 OS=Arabidopsis thaliana OX=3702 GN=UGT74E2 PE=1 SV=1	--	--	hypothetical protein F2P56_032125, partial [Juglans regia]
Cyclocarya_paliurus_newGene_16301	3	0	0	139	41	17	0.032484	0	0	0.683837	0.324912	0.313978	0.00354364064339339	4.15127112789634	up	--	--	Biological Process: defense response (GO:0006952);; Molecular Function: ADP binding (GO:0043531);;	--	--	--	--	Leucine Rich repeats (2 copies)	--	T	Signal transduction mechanisms	putative disease resistance protein RGA1 [Juglans regia]
Cyclocarya_paliurus_newGene_19259	62	0	0	1850	1612	1362	0.364462	0	0	9.6259	8.67222	8.49211	0.00444621478848223	4.14324087230146	up	--	--	Molecular Function: zinc ion binding (GO:0008270);;	K05849|1.1e-103|tcc:18613571|K05849 solute carrier family 8 (sodium/calcium exchanger) | (RefSeq) uncharacterized LOC18613571	--	[R]	General function prediction only	PPR repeat	Pentatricopeptide repeat-containing protein At5g48910 OS=Arabidopsis thaliana OX=3702 GN=PCMP-H38 PE=2 SV=1	S	Function unknown	pentatricopeptide repeat-containing protein At1g08070, chloroplastic-like isoform X1 [Juglans regia]
Cyclocarya_paliurus_newGene_4557	70	0	0	2042	1919	1683	0.716726	0	0	28.0942	27.2714	27.7612	0.0045242033237895	4.14180098211779	up	[PR]	Inorganic ion transport and metabolism;; General function prediction only	Molecular Function: iron ion binding (GO:0005506);; Molecular Function: chlorophyllide a oxygenase [overall] activity (GO:0010277);; Molecular Function: 2 iron, 2 sulfur cluster binding (GO:0051537);;	K13600|7.5e-258|jre:108988337|K13600 chlorophyllide a oxygenase [EC:1.14.13.122] | (RefSeq) chlorophyllide a oxygenase, chloroplastic	Porphyrin and chlorophyll metabolism (ko00860)	--	--	Rieske [2Fe-2S] domain	Chlorophyllide a oxygenase, chloroplastic OS=Oryza sativa subsp. japonica OX=39947 GN=CAO PE=2 SV=1	P	Inorganic ion transport and metabolism	chlorophyllide a oxygenase, chloroplastic [Juglans regia]
Cyclocarya_paliurus_newGene_11799	71	0	0	2272	2116	1368	0.521887	0	0	23.1803	22.2842	16.6252	0.00463575269374432	4.13204795621544	up	[N]	Cell motility	Cellular Component: integral component of membrane (GO:0016021);; Molecular Function: cellulose synthase (UDP-forming) activity (GO:0016760);; Biological Process: cellulose biosynthetic process (GO:0030244);; Biological Process: cell wall organization (GO:0071555);;	K10891|5.4e-187|tcc:18612304|K10891 fanconi anemia group D2 protein | (RefSeq) Fanconi anemia group D2 protein homolog	--	--	--	Cellulose synthase	Cellulose synthase-like protein H1 OS=Oryza sativa subsp. japonica OX=39947 GN=CSLH1 PE=2 SV=2	G	Carbohydrate transport and metabolism	hypothetical protein F2P56_022353, partial [Juglans regia]
Cyclocarya_paliurus_newGene_11046	19	0	0	434	353	274	0.111603	0	0	3.45727	2.91556	2.90888	0.00393564521286732	4.12761586706892	up	--	--	--	K06268|2.7e-20|bdi:100831266|K06268 serine/threonine-protein phosphatase 2B regulatory subunit | (RefSeq) myosin-binding protein 3	--	--	--	Zein-binding	Myosin-binding protein 7 OS=Arabidopsis thaliana OX=3702 GN=MYOB7 PE=1 SV=1	S	Function unknown	uncharacterized protein LOC108985377 [Juglans regia]
Cyclocarya_paliurus_newGene_24020	36	0	0	764	853	675	0.355605	0	0	6.71013	7.88448	6.67231	0.00433349013155557	4.12306730071136	up	--	--	Molecular Function: aspartic-type endopeptidase activity (GO:0004190);;	K22683|5.7e-06|ppp:112290114|K22683 aspartyl protease family protein [EC:3.4.23.-] | (RefSeq) aspartyl protease family protein 2-like isoform X1	--	[O]	Posttranslational modification, protein turnover, chaperones	Xylanase inhibitor C-terminal	Aspartyl protease family protein 1 OS=Arabidopsis thaliana OX=3702 GN=APF1 PE=2 SV=1	O	Posttranslational modification, protein turnover, chaperones	aspartyl protease family protein 1-like isoform X1 [Juglans regia]
Cyclocarya_paliurus_newGene_16371	18	0	0	357	276	329	0.107059	0	0	2.89906	2.53331	3.36122	0.00404732611189863	4.11220288422018	up	--	--	--	K18643|3.0e-17|gra:105795008|K18643 katanin p80 WD40 repeat-containing subunit B1 | (RefSeq) uncharacterized LOC105795008	--	--	--	Protein of unknown function (DUF789)	--	S	Function unknown	uncharacterized protein LOC109013782 [Juglans regia]
Cyclocarya_paliurus_newGene_11605	1	0	0	14	17	47	0.008306	0	0	0.209894	0.275754	0.897751	0.00413240201586474	4.10373166811953	up	[O]	Posttranslational modification, protein turnover, chaperones	Molecular Function: cysteine-type endopeptidase activity (GO:0004197);; Cellular Component: integral component of membrane (GO:0016021);; Biological Process: CAAX-box protein processing (GO:0071586);;	K23336|9.8e-23|smo:SELMODRAFT_439598|K23336 armadillo repeat-containing protein 8 | (RefSeq) hypothetical protein	--	--	--	CPBP intramembrane metalloprotease	--	S	Function unknown	uncharacterized protein LOC109015722 isoform X1 [Juglans regia]
Cyclocarya_paliurus_newGene_7019	6	0	0	112	105	73	0.04694	0	0	1.3297	1.49834	1.08006	0.00374414597660017	4.09303636480712	up	--	--	Cellular Component: integral component of membrane (GO:0016021);; Molecular Function: cellulose synthase (UDP-forming) activity (GO:0016760);; Biological Process: cellulose biosynthetic process (GO:0030244);; Biological Process: cell wall organization (GO:0071555);;	K10999|2.1e-122|dosa:Os09t0422500-01|K10999 cellulose synthase A [EC:2.4.1.12] | (RefSeq) Os09g0422500, BC6, BRITTLE_CULM_6, CESA9, CELLULOSE_SYNTHASE_A9; Similar to Cellulose synthase (Fragment).	--	--	--	Cellulose synthase	Cellulose synthase-like protein G3 OS=Arabidopsis thaliana OX=3702 GN=CSLG3 PE=2 SV=2	G	Carbohydrate transport and metabolism	cellulose synthase-like protein G3 isoform X1 [Juglans regia]
Cyclocarya_paliurus_newGene_26493	23	0	0	328	597	324	0.259456	0	0	4.57829	9.62062	5.93372	0.00460996582515841	4.07137679182079	up	[G]	Carbohydrate transport and metabolism	Cellular Component: integral component of membrane (GO:0016021);; Molecular Function: transmembrane transporter activity (GO:0022857);;	K24193|1.5e-143|qsu:112015497|K24193 MFS transporter, SP family, sugar:H+ symporter | (RefSeq) hexose carrier protein HEX6-like isoform X1	--	[R]	General function prediction only	Sugar (and other) transporter	Hexose carrier protein HEX6 OS=Ricinus communis OX=3988 GN=HEX6 PE=2 SV=1	U	Intracellular trafficking, secretion, and vesicular transport	hexose carrier protein HEX6-like [Juglans regia]
Cyclocarya_paliurus_newGene_28848	55	0	0	1397	1351	947	0.226483	0	0	7.79716	7.76294	6.33935	0.00512105630048118	4.07093382664418	up	[Q]	Secondary metabolites biosynthesis, transport and catabolism	Molecular Function: diacylglycerol O-acyltransferase activity (GO:0004144);; Cellular Component: integral component of membrane (GO:0016021);; Biological Process: glycerolipid biosynthetic process (GO:0045017);;	K15406|2.3e-114|bna:106451554|K15406 wax-ester synthase / diacylglycerol O-acyltransferase [EC:2.3.1.75 2.3.1.20] | (RefSeq) O-acyltransferase WSD1	Cutin, suberine and wax biosynthesis (ko00073)	--	--	WS/DGAT C-terminal domain	O-acyltransferase WSD1 OS=Arabidopsis thaliana OX=3702 GN=WSD1 PE=2 SV=1	S	Function unknown	O-acyltransferase WSD1-like isoform X1 [Juglans regia]
Cyclocarya_paliurus_newGene_329	5	0	0	116	68	56	0.106963	0	0	3.77298	2.28611	2.16333	0.00401397562252548	4.0632328480836	up	--	--	--	K20818|1.7e-61|jre:108996517|K20818 KxDL motif-containing protein 1 | (RefSeq) kxDL motif-containing protein 1-like	--	[S]	Function unknown	Uncharacterized conserved protein	--	S	Function unknown	kxDL motif-containing protein 1-like [Juglans regia]
Cyclocarya_paliurus_newGene_7278	1	0	0	19	33	21	0.00396	0	0	0.494334	0.876038	0.67318	0.00441651370493648	4.05776821944179	up	--	--	--	K03239|5.8e-11|rcu:8276560|K03239 translation initiation factor eIF-2B subunit alpha | (RefSeq) methylthioribose-1-phosphate isomerase	RNA transport (ko03013)	--	--	LURP-one-related	Protein LURP-one-related 4 OS=Arabidopsis thaliana OX=3702 GN=At1g63410 PE=3 SV=1	S	Function unknown	protein LURP-one-related 4-like [Juglans regia]
Cyclocarya_paliurus_newGene_13128	21	0	0	423	407	262	0.328135	0	0	8.90076	8.8442	6.60531	0.00467568357783787	4.05621455587726	up	--	--	Biological Process: regulation of immune system process (GO:0002682);; Biological Process: positive regulation of immune system process (GO:0002684);; Biological Process: regulation of response to biotic stimulus (GO:0002831);; Biological Process: positive regulation of response to biotic stimulus (GO:0002833);; Molecular Function: molecular_function (GO:0003674);; Molecular Function: GTPase acti…	K01537|4.8e-48|jcu:105638585|K01537 P-type Ca2+ transporter type 2C [EC:7.2.2.10] | (RefSeq) calcium-transporting ATPase 2, plasma membrane-type isoform X1	--	[R]	General function prediction only	C2 domain	Protein C2-DOMAIN ABA-RELATED 4 OS=Arabidopsis thaliana OX=3702 GN=CAR4 PE=1 SV=1	S	Function unknown	protein C2-DOMAIN ABA-RELATED 4-like [Juglans regia]
Cyclocarya_paliurus_newGene_37670	5	0	0	119	61	56	0.091128	0	0	2.99397	1.6115	1.7221	0.00419954277368092	4.04509618878692	up	--	--	Biological Process: regulation of transcription, DNA-templated (GO:0006355);; Molecular Function: zinc ion binding (GO:0008270);; Molecular Function: sequence-specific DNA binding (GO:0043565);;	--	--	--	--	--	--	K	Transcription	GATA transcription factor 15-like isoform X1 [Juglans regia]
Cyclocarya_paliurus_newGene_32914	55	0	0	1189	1119	1142	0.749651	0	0	21.7141	21.1403	25.0053	0.00552409171230947	4.03523513791983	up	--	--	Molecular Function: protein dimerization activity (GO:0046983);;	K20558|1.5e-24|mtr:MTR_1g028470|K20558 transcription factor SPEECHLESS | (RefSeq) basic helix loop helix (BHLH) DNA-binding family protein	MAPK signaling pathway - plant (ko04016)	--	--	Helix-loop-helix DNA-binding domain	Transcription factor bHLH94 OS=Arabidopsis thaliana OX=3702 GN=BHLH94 PE=1 SV=2	K	Transcription	transcription factor bHLH96-like [Juglans regia]
Cyclocarya_paliurus_newGene_13905	71	0	0	1309	2224	1371	0.90032	0	0	22.9524	41.1042	29.2886	0.00571569038642278	4.03496184102664	up	[HC]	Coenzyme transport and metabolism;; Energy production and conversion	Molecular Function: FAD binding (GO:0071949);;	K09838|5.4e-07|vcn:VOLCADRAFT_75879|K09838 zeaxanthin epoxidase [EC:1.14.15.21] | (RefSeq) hypothetical protein	Carotenoid biosynthesis (ko00906)	[CR]	Energy production and conversion;; General function prediction only	FAD binding domain	Monooxygenase 2 OS=Arabidopsis thaliana OX=3702 GN=MO2 PE=2 SV=1	C	Energy production and conversion	monooxygenase 2-like [Juglans regia]
Cyclocarya_paliurus_newGene_11499	37	0	0	644	680	721	0.107907	0	0	2.17451	2.44467	3.01531	0.00539354456049712	4.02418666144525	up	--	--	--	K07305|1.2e-07|cit:102622869|K07305 peptide-methionine (R)-S-oxide reductase [EC:1.8.4.12] | (RefSeq) uncharacterized protein LOC102622869	--	--	--	--	--	S	Function unknown	hypothetical protein F2P56_036105, partial [Juglans regia]
Cyclocarya_paliurus_newGene_33939	12	0	0	205	160	176	0.06958	0	0	1.46586	1.2647	1.36764	0.00469709001694022	4.02176851635114	up	--	--	Molecular Function: hydrolase activity (GO:0016787);; Biological Process: phosphatidylinositol dephosphorylation (GO:0046856);;	--	--	[U]	Intracellular trafficking, secretion, and vesicular transport	--	Type I inositol polyphosphate 5-phosphatase 12 OS=Arabidopsis thaliana OX=3702 GN=IP5P12 PE=1 SV=2	T	Signal transduction mechanisms	type I inositol polyphosphate 5-phosphatase 12-like isoform X2 [Juglans regia]
Cyclocarya_paliurus_newGene_7333	282	0	0	10224	14736	7941	2.67091	0	0	129.786	193.426	120.876	0.00666710015846058	4.02128002527688	up	[I]	Lipid transport and metabolism	Molecular Function: hydroxymethylglutaryl-CoA synthase activity (GO:0004421);; Biological Process: isoprenoid biosynthetic process (GO:0008299);; Biological Process: sterol biosynthetic process (GO:0016126);;	K01641|1.5e-264|jre:108990693|K01641 hydroxymethylglutaryl-CoA synthase [EC:2.3.3.10] | (RefSeq) hydroxymethylglutaryl-CoA synthase-like	Synthesis and degradation of ketone bodies (ko00072);; Valine, leucine and isoleucine degradation (ko00280);; Butanoate metabolism (ko00650);; Terpenoid backbone biosynthesis (ko00900)	[I]	Lipid transport and metabolism	Hydroxymethylglutaryl-coenzyme A synthase C terminal	Hydroxymethylglutaryl-CoA synthase OS=Arabidopsis thaliana OX=3702 GN=HMGS PE=1 SV=2	I	Lipid transport and metabolism	hydroxymethylglutaryl-CoA synthase-like [Juglans regia]
Cyclocarya_paliurus_newGene_28923	705	0	285	17724	13251	14986	6.6363	0	3.40179	223.353	172.546	226.459	0.00462996291857056	4.01700514290524	up	[K]	Transcription	Molecular Function: transcription factor activity, sequence-specific DNA binding (GO:0003700);; Biological Process: DNA-templated transcription, initiation (GO:0006352);;	K03093|1.1e-279|jre:109004224|K03093 RNA polymerase sigma factor | (RefSeq) RNA polymerase sigma factor sigE, chloroplastic/mitochondrial-like	--	--	--	Sigma-70 region 3	RNA polymerase sigma factor sigE, chloroplastic/mitochondrial OS=Arabidopsis thaliana OX=3702 GN=SIGE PE=1 SV=1	K	Transcription	RNA polymerase sigma factor sigE, chloroplastic/mitochondrial-like [Juglans regia]
Cyclocarya_paliurus_newGene_6224	121	0	0	3494	3485	2607	1.1219	0	0	44.0496	45.422	39.415	0.0062770758163471	4.01424585509696	up	--	--	Cellular Component: integral component of membrane (GO:0016021);;	--	--	--	--	--	--	--	--	uncharacterized protein LOC108985095 [Juglans regia]
Cyclocarya_paliurus_newGene_18494	287	0	0	11546	10763	9737	3.37217	0	0	182.528	175.875	184.614	0.00682846826359917	4.00898369490821	up	--	--	Biological Process: regulation of transcription, DNA-templated (GO:0006355);; Biological Process: circadian rhythm (GO:0007623);;	--	--	--	--	--	Protein LNK3 OS=Arabidopsis thaliana OX=3702 GN=LNK3 PE=1 SV=1	--	--	protein LNK3-like isoform X2 [Juglans regia]
Cyclocarya_paliurus_newGene_1571	39	0	0	697	764	650	0.662768	0	0	16.4377	18.6651	18.4628	0.00574704561803389	3.99678642466214	up	--	--	--	--	--	--	--	--	--	--	--	unknown [Lotus japonicus]
Cyclocarya_paliurus_newGene_38542	70	0	0	1662	1403	1307	0.939971	0	0	30.3376	26.2797	28.43	0.0063466109971519	3.98205023198823	up	--	--	Molecular Function: DNA binding (GO:0003677);; Cellular Component: nucleus (GO:0005634);;	K12133|7.5e-29|ppp:112280611|K12133 MYB-related transcription factor LHY | (RefSeq) uncharacterized protein LOC112280611	Circadian rhythm - plant (ko04712)	[O]	Posttranslational modification, protein turnover, chaperones	Myb-like DNA-binding domain	Protein REVEILLE 8 OS=Arabidopsis thaliana OX=3702 GN=RVE8 PE=2 SV=1	K	Transcription	protein REVEILLE 8-like isoform X2 [Juglans regia]
Cyclocarya_paliurus_newGene_7748	28	0	0	542	456	382	0.311084	0	0	8.5439	7.50735	6.89514	0.00572994597071762	3.97881426934139	up	--	--	Molecular Function: DNA binding (GO:0003677);; Cellular Component: nucleus (GO:0005634);; Biological Process: regulation of transcription, DNA-templated (GO:0006355);;	--	--	--	--	--	--	K	Transcription	NAC transcription factor 56-like [Juglans regia]
Cyclocarya_paliurus_newGene_1037	19	0	0	217	386	260	0.140246	0	0	2.36354	4.05333	3.16529	0.00560114561009489	3.96994342871598	up	[T]	Signal transduction mechanisms	Molecular Function: protein kinase activity (GO:0004672);; Molecular Function: ATP binding (GO:0005524);; Cellular Component: integral component of membrane (GO:0016021);;	K24104|2.2e-90|thj:104799061|K24104 GPN-loop GTPase | (RefSeq) LOW QUALITY PROTEIN: uncharacterized protein LOC104799061	--	--	--	Protein kinase domain	Cysteine-rich receptor-like protein kinase 25 OS=Arabidopsis thaliana OX=3702 GN=CRK25 PE=3 SV=1	T	Signal transduction mechanisms	cysteine-rich receptor-like protein kinase 10 [Quercus lobata]
Cyclocarya_paliurus_newGene_5392	90	0	0	2114	3028	1098	1.4827	0	0	46.7904	69.278	29.1368	0.00681204723413926	3.96555403015123	up	--	--	Cellular Component: plasma membrane (GO:0005886);; Biological Process: response to nitrate (GO:0010167);; Biological Process: nitrate transport (GO:0015706);; Cellular Component: integral component of membrane (GO:0016021);; Biological Process: nitrate assimilation (GO:0042128);;	--	--	--	--	High-affinity nitrate transporter accessory	High-affinity nitrate transporter 3.1 OS=Arabidopsis thaliana OX=3702 GN=NRT3.1 PE=1 SV=1	S	Function unknown	high-affinity nitrate transporter 3.2-like [Juglans regia]
Cyclocarya_paliurus_newGene_13216	50	0	0	899	1031	831	0.189044	0	0	7.15562	7.48484	8.15201	0.00633394269834586	3.96490876639639	up	--	--	Molecular Function: DNA binding (GO:0003677);; Cellular Component: nucleus (GO:0005634);;	K12133|2.2e-35|ppp:112280611|K12133 MYB-related transcription factor LHY | (RefSeq) uncharacterized protein LOC112280611	Circadian rhythm - plant (ko04712)	[O]	Posttranslational modification, protein turnover, chaperones	Myb-like DNA-binding domain	Protein REVEILLE 1 OS=Arabidopsis thaliana OX=3702 GN=RVE1 PE=1 SV=1	K	Transcription	protein REVEILLE 1-like [Juglans regia]
Cyclocarya_paliurus_newGene_584	19	0	0	350	243	255	0.25741	0	0	6.95797	4.78026	6.23706	0.00570313204583826	3.9590337578262	up	--	--	--	--	--	--	--	Petal formation-expressed	Probable F-box protein At4g22030 OS=Arabidopsis thaliana OX=3702 GN=At4g22030 PE=4 SV=1	S	Function unknown	probable F-box protein At4g22030 [Juglans regia]
Cyclocarya_paliurus_newGene_7188	21	0	0	265	465	233	0.379899	0	0	6.60421	12.011	6.97567	0.005883979137765	3.95357499355567	up	[I]	Lipid transport and metabolism	Molecular Function: 2-C-methyl-D-erythritol 2,4-cyclodiphosphate synthase activity (GO:0008685);; Biological Process: terpenoid biosynthetic process (GO:0016114);;	K01770|2.0e-124|jre:108983878|K01770 2-C-methyl-D-erythritol 2,4-cyclodiphosphate synthase [EC:4.6.1.12] | (RefSeq) 2-C-methyl-D-erythritol 2,4-cyclodiphosphate synthase, chloroplastic	Terpenoid backbone biosynthesis (ko00900)	--	--	YgbB family	2-C-methyl-D-erythritol 2,4-cyclodiphosphate synthase, chloroplastic OS=Catharanthus roseus OX=4058 GN=ISPF PE=2 SV=1	H	Coenzyme transport and metabolism	2-C-methyl-D-erythritol 2,4-cyclodiphosphate synthase, chloroplastic [Juglans regia]
Cyclocarya_paliurus_newGene_35170	111	0	0	2225	3220	2188	1.58361	0	0	42.6518	63.8327	50.291	0.00713470013255683	3.94881387850717	up	[G]	Carbohydrate transport and metabolism	Molecular Function: channel activity (GO:0015267);; Cellular Component: integral component of membrane (GO:0016021);;	K09872|1.4e-164|jre:108991817|K09872 aquaporin PIP | (RefSeq) aquaporin PIP1-2	--	[G]	Carbohydrate transport and metabolism	Major intrinsic protein	Probable aquaporin PIP1-4 OS=Arabidopsis thaliana OX=3702 GN=PIP1.4 PE=1 SV=1	P	Inorganic ion transport and metabolism	aquaporin [Juglans regia]
Cyclocarya_paliurus_newGene_3943	120	0	0	2677	3411	2259	1.42395	0	0	40.7132	53.003	41.0762	0.00731643893784463	3.93969640996346	up	[P]	Inorganic ion transport and metabolism	Cellular Component: integral component of membrane (GO:0016021);; Molecular Function: transmembrane transporter activity (GO:0022857);;	K02575|2.2e-200|jre:108979104|K02575 MFS transporter, NNP family, nitrate/nitrite transporter | (RefSeq) high affinity nitrate transporter 2.5-like	Nitrogen metabolism (ko00910)	--	--	Major Facilitator Superfamily	High affinity nitrate transporter 2.5 OS=Arabidopsis thaliana OX=3702 GN=NRT2.5 PE=1 SV=1	P	Inorganic ion transport and metabolism	high affinity nitrate transporter 2.5-like [Juglans regia]
Cyclocarya_paliurus_newGene_27909	80	0	0	1835	1613	1417	0.798803	0	0	24.7039	22.4524	22.8684	0.00703669276648103	3.93893179567889	up	[V]	Defense mechanisms	Molecular Function: antiporter activity (GO:0015297);; Cellular Component: integral component of membrane (GO:0016021);; Molecular Function: xenobiotic transporter activity (GO:0042910);;	K03327|1.3e-240|jre:108989721|K03327 multidrug resistance protein, MATE family | (RefSeq) protein DETOXIFICATION 29	--	[R]	General function prediction only	MatE	Protein DETOXIFICATION 31 OS=Arabidopsis thaliana OX=3702 GN=DTX31 PE=2 SV=1	V	Defense mechanisms	protein DETOXIFICATION 29-like [Juglans regia]
Cyclocarya_paliurus_newGene_15751	222	0	0	6798	6078	5492	2.45281	0	0	100.866	93.2426	97.7146	0.00805827697056347	3.91724293465365	up	[V]	Defense mechanisms	Molecular Function: antiporter activity (GO:0015297);; Cellular Component: integral component of membrane (GO:0016021);; Molecular Function: xenobiotic transporter activity (GO:0042910);;	K03327|8.9e-271|jre:108990586|K03327 multidrug resistance protein, MATE family | (RefSeq) protein DETOXIFICATION 27-like isoform X1	--	[R]	General function prediction only	MatE	Protein DETOXIFICATION 27 OS=Arabidopsis thaliana OX=3702 GN=DTX27 PE=2 SV=1	B	Chromatin structure and dynamics	protein DETOXIFICATION 27-like isoform X1 [Juglans regia]
Cyclocarya_paliurus_newGene_31814	77	0	0	1447	1690	1297	0.413367	0	0	11.2684	16.0149	11.8824	0.00741545171588002	3.91164851227301	up	--	--	--	--	--	--	--	--	Uncharacterized protein At4g04980 OS=Arabidopsis thaliana OX=3702 GN=At4g04980 PE=2 SV=1	S	Function unknown	uncharacterized protein At4g04980-like isoform X2 [Juglans regia]
Cyclocarya_paliurus_newGene_29560	14	0	0	204	214	138	0.091601	0	0	2.09898	2.26878	1.69994	0.00631965793311244	3.89418078083057	up	[G]	Carbohydrate transport and metabolism	Molecular Function: transferase activity, transferring glycosyl groups (GO:0016757);;	K06617|2.6e-212|egr:104445147|K06617 raffinose synthase [EC:2.4.1.82] | (RefSeq) probable galactinol--sucrose galactosyltransferase 2	Galactose metabolism (ko00052)	--	--	Raffinose synthase or seed imbibition protein Sip1	Probable galactinol--sucrose galactosyltransferase 2 OS=Arabidopsis thaliana OX=3702 GN=RFS2 PE=2 SV=2	S	Function unknown	probable galactinol--sucrose galactosyltransferase 2 [Juglans regia]
Cyclocarya_paliurus_newGene_4821	22	0	0	499	94	395	0.136678	0	0	4.52345	0.86281	4.28498	0.00712960145782349	3.88566047223188	up	--	--	Molecular Function: protein binding (GO:0005515);;	K03122|2.7e-07|mdm:114825099|K03122 transcription initiation factor TFIIA large subunit | (RefSeq) uncharacterized protein LOC114825099	Basal transcription factors (ko03022)	--	--	PB1 domain	--	S	Function unknown	uncharacterized protein LOC109013150 [Juglans regia]
Cyclocarya_paliurus_newGene_7467	89	0	0	3697	3659	143	0.872103	0	0	48.8674	49.9782	2.26102	0.00868811311226097	3.88238014538546	up	[QV]	Secondary metabolites biosynthesis, transport and catabolism;; Defense mechanisms	Molecular Function: monooxygenase activity (GO:0004497);; Molecular Function: iron ion binding (GO:0005506);; Cellular Component: integral component of membrane (GO:0016021);; Molecular Function: oxidoreductase activity, acting on paired donors, with incorporation or reduction of molecular oxygen (GO:0016705);; Molecular Function: heme binding (GO:0020037);;	K20770|3.3e-138|gab:108483715|K20770 (+)-delta-cadinene 8-hydroxylase [EC:1.14.-.-] | (RefSeq) flavonoid 3'-monooxygenase-like	--	[Q]	Secondary metabolites biosynthesis, transport and catabolism	Cytochrome P450	Flavonoid 3'-monooxygenase CYP75B137 OS=Crocosmia x crocosmiiflora OX=1053288 GN=CYP75B137 PE=1 SV=1	Q	Secondary metabolites biosynthesis, transport and catabolism	flavonoid 3'-monooxygenase CYP75B137-like [Juglans regia]
Cyclocarya_paliurus_newGene_36643	19	0	0	209	374	193	0.24072	0	0	3.66245	6.7994	4.06663	0.00684140330030834	3.87712991747666	up	--	--	--	--	--	--	--	--	--	--	--	uncharacterized protein LOC108994466 [Juglans regia]
Cyclocarya_paliurus_newGene_17486	8	0	0	119	127	59	0.072745	0	0	0.902024	0.941904	0.516097	0.00630748045665141	3.87364106371727	up	[K]	Transcription	Biological Process: signal transduction (GO:0007165);; Molecular Function: ADP binding (GO:0043531);;	K00695|5.7e-73|mtr:MTR_6g478030|K00695 sucrose synthase [EC:2.4.1.13] | (RefSeq) sucrose synthase	Starch and sucrose metabolism (ko00500)	--	--	NB-ARC domain	Disease resistance protein RPV1 OS=Vitis rotundifolia OX=103349 GN=RPV1 PE=1 SV=1	S	Function unknown	disease resistance protein RUN1-like [Juglans regia]
Cyclocarya_paliurus_newGene_21457	84	0	0	1346	2034	1314	0.732464	0	0	15.7598	24.6301	18.4484	0.00813663452902684	3.87141689358284	up	[IQ]	Lipid transport and metabolism;; Secondary metabolites biosynthesis, transport and catabolism	Molecular Function: ligase activity (GO:0016874);;	K01904|1.1e-303|jre:108998277|K01904 4-coumarate--CoA ligase [EC:6.2.1.12] | (RefSeq) 4-coumarate--CoA ligase 1-like	Ubiquinone and other terpenoid-quinone biosynthesis (ko00130);; Phenylpropanoid biosynthesis (ko00940)	[I]	Lipid transport and metabolism	AMP-binding enzyme	4-coumarate--CoA ligase 1 OS=Nicotiana tabacum OX=4097 GN=4CL1 PE=2 SV=1	I	Lipid transport and metabolism	4-coumarate:CoA ligase [Juglans sigillata]
Cyclocarya_paliurus_newGene_36983	8	0	0	93	96	102	0.062999	0	0	0.872963	0.871309	0.966734	0.00636770588122739	3.86585383593205	up	--		Molecular Function: protein kinase activity (GO:0004672);; Molecular Function: ATP binding (GO:0005524);; Molecular Function: polysaccharide binding (GO:0030247);;	K13459|1.8e-50|jcu:105634805|K13459 disease resistance protein RPS2 | (RefSeq) probable disease resistance protein At1g12280 isoform X1	Plant-pathogen interaction (ko04626)	--	--	Protein kinase domain	Rust resistance kinase Lr10 OS=Triticum aestivum OX=4565 GN=LRK10 PE=2 SV=1	T	Signal transduction mechanisms	hypothetical protein F2P56_018829 [Juglans regia]
Cyclocarya_paliurus_newGene_6343	6	0	0	40	140	53	0.034635	0	0	0.419273	1.23165	0.602069	0.00654438443095526	3.86302787691345	up	[I]	Lipid transport and metabolism	Molecular Function: acyl-CoA oxidase activity (GO:0003997);; Cellular Component: peroxisome (GO:0005777);; Biological Process: fatty acid beta-oxidation (GO:0006635);; Molecular Function: FAD binding (GO:0071949);;	K00232|9.8e-172|jre:108989910|K00232 acyl-CoA oxidase [EC:1.3.3.6] | (RefSeq) peroxisomal acyl-coenzyme A oxidase 1-like	Fatty acid degradation (ko00071);; beta-Alanine metabolism (ko00410);; alpha-Linolenic acid metabolism (ko00592);; Propanoate metabolism (ko00640);; Biosynthesis of unsaturated fatty acids (ko01040);; Carbon metabolism (ko01200);; Fatty acid metabolism (ko01212);; Peroxisome (ko04146)	[I]	Lipid transport and metabolism	--	Peroxisomal acyl-coenzyme A oxidase 1 OS=Arabidopsis thaliana OX=3702 GN=ACX1 PE=1 SV=1	I	Lipid transport and metabolism	peroxisomal acyl-coenzyme A oxidase 1-like [Juglans regia]
Cyclocarya_paliurus_newGene_1638	5	0	0	33	23	143	0.033313	0	0	0.317823	0.22461	1.87951	0.0069456421559825	3.86300744551677	up	[R]	General function prediction only	Molecular Function: protein kinase activity (GO:0004672);; Molecular Function: ATP binding (GO:0005524);; Cellular Component: integral component of membrane (GO:0016021);;	K13416|8.5e-31|qsu:112022891|K13416 brassinosteroid insensitive 1-associated receptor kinase 1 [EC:2.7.10.1 2.7.11.1] | (RefSeq) BRASSINOSTEROID INSENSITIVE 1-associated receptor kinase 1-like	MAPK signaling pathway - plant (ko04016);; Plant hormone signal transduction (ko04075);; Plant-pathogen interaction (ko04626)	--	--	Protein kinase domain	Receptor protein kinase-like protein At4g34220 OS=Arabidopsis thaliana OX=3702 GN=At4g34220 PE=2 SV=1	T	Signal transduction mechanisms	receptor protein kinase-like protein At4g34220 [Juglans regia]
Cyclocarya_paliurus_newGene_33762	135	0	0	3135	2604	2587	1.7859	0	0	55.6784	47.8056	55.0778	0.00883940294452635	3.85068318158045	up	[Q]	Secondary metabolites biosynthesis, transport and catabolism	Molecular Function: oxidoreductase activity (GO:0016491);; Molecular Function: metal ion binding (GO:0046872);;	K13229|5.5e-92|ats:109766943|K13229 2,4-dihydroxy-1,4-benzoxazin-3-one-glucoside dioxygenase [EC:1.14.11.59] | (RefSeq) LOC109766943; DIBOA-glucoside dioxygenase BX6-like	Benzoxazinoid biosynthesis (ko00402)	[QR]	Secondary metabolites biosynthesis, transport and catabolism;; General function prediction only	2OG-Fe(II) oxygenase superfamily	1-aminocyclopropane-1-carboxylate oxidase homolog 1 OS=Arabidopsis thaliana OX=3702 GN=At1g06620 PE=2 SV=1	Q	Secondary metabolites biosynthesis, transport and catabolism	hypothetical protein F2P56_015942 [Juglans regia]
Cyclocarya_paliurus_newGene_7544	26	0	1	247	410	163	0.304704	0	0.002534	4.16039	7.12989	3.26609	0.00580135161985859	3.84947648270888	up	--	--	Molecular Function: endopeptidase inhibitor activity (GO:0004866);;	--	--	--	--	Trypsin and protease inhibitor	Kunitz type trypsin inhibitor 104 OS=Medicago truncatula OX=3880 GN=KPI104 PE=1 SV=1	S	Function unknown	kunitz type trypsin inhibitor 104-like [Juglans regia]
Cyclocarya_paliurus_newGene_18289	48	0	0	516	1275	454	0.534291	0	0	4.36019	11.2136	4.50997	0.0086794565784793	3.81823570713885	up	--	--	Biological Process: cellular response to phosphate starvation (GO:0016036);;	K16275|9.2e-06|bdi:100833458|K16275 E3 ubiquitin-protein ligase BAH [EC:2.3.2.27] | (RefSeq) probable E3 ubiquitin-protein ligase BAH1-like 1 isoform X2	--	[P]	Inorganic ion transport and metabolism	SPX domain	SPX domain-containing protein 3 OS=Arabidopsis thaliana OX=3702 GN=SPX3 PE=2 SV=1	P	Inorganic ion transport and metabolism	hypothetical protein F2P56_010589, partial [Juglans regia]
Cyclocarya_paliurus_newGene_700	12	0	0	114	167	137	0.22729	0	0	1.34661	2.98218	1.99612	0.00749189585839631	3.80811718932419	up	--		Molecular Function: protein kinase activity (GO:0004672);; Molecular Function: ATP binding (GO:0005524);; Cellular Component: integral component of membrane (GO:0016021);;	K24104|1.8e-77|thj:104799061|K24104 GPN-loop GTPase | (RefSeq) LOW QUALITY PROTEIN: uncharacterized protein LOC104799061	--	--	--	Protein tyrosine and serine/threonine kinase	Cysteine-rich receptor-like protein kinase 10 OS=Arabidopsis thaliana OX=3702 GN=CRK10 PE=1 SV=3	T	Signal transduction mechanisms	hypothetical protein F2P56_006588 [Juglans regia]
Cyclocarya_paliurus_newGene_13890	145	0	0	2846	3312	2319	1.36305	0	0	39.101	47.0953	38.1846	0.00979175581665103	3.80218540433795	up	[GI]	Carbohydrate transport and metabolism;; Lipid transport and metabolism	Molecular Function: enzyme inhibitor activity (GO:0004857);; Molecular Function: pectinesterase activity (GO:0030599);; Biological Process: cell wall modification (GO:0042545);; Molecular Function: aspartyl esterase activity (GO:0045330);; Biological Process: pectin catabolic process (GO:0045490);;	K01051|2.7e-88|nsy:104217570|K01051 pectinesterase [EC:3.1.1.11] | (RefSeq) pectinesterase 2-like	Pentose and glucuronate interconversions (ko00040)	--	--	Pectinesterase	Probable pectinesterase/pectinesterase inhibitor 51 OS=Arabidopsis thaliana OX=3702 GN=PME51 PE=2 SV=1	G	Carbohydrate transport and metabolism	hypothetical protein F2P56_002194, partial [Juglans regia]
Cyclocarya_paliurus_newGene_39069	42	0	0	421	895	481	0.654232	0	0	9.08063	19.6371	12.0789	0.00884744914389579	3.79778298192835	up	--	--	Molecular Function: DNA binding (GO:0003677);; Cellular Component: nucleus (GO:0005634);; Biological Process: regulation of transcription, DNA-templated (GO:0006355);;	K00521|5.2e-40|cmos:111447866|K00521 ferric-chelate reductase [EC:1.16.1.7] | (RefSeq) ferric reduction oxidase 7, chloroplastic-like	--	--	--	No apical meristem (NAM) protein	Transcription factor JUNGBRUNNEN 1 OS=Arabidopsis thaliana OX=3702 GN=JUB1 PE=1 SV=1	K	Transcription	transcription factor JUNGBRUNNEN 1-like [Juglans regia]
Cyclocarya_paliurus_newGene_28562	30	0	0	426	300	436	0.435966	0	0	8.33271	6.06815	10.2357	0.00855546701651375	3.7933980791584	up	--	--	--	--	--	--	--	PLATZ transcription factor	--	S	Function unknown	uncharacterized protein LOC109004546 [Juglans regia]
Cyclocarya_paliurus_newGene_20985	22	0	0	362	163	295	0.22487	0	0	5.00229	2.31809	4.88194	0.00836285527210731	3.79119973063645	up	[C]	Energy production and conversion	Biological Process: cytokinin metabolic process (GO:0009690);; Molecular Function: cytokinin dehydrogenase activity (GO:0019139);; Molecular Function: FAD binding (GO:0071949);;	K00279|3.4e-184|jre:109010570|K00279 cytokinin dehydrogenase [EC:1.5.99.12] | (RefSeq) cytokinin dehydrogenase 6-like	Zeatin biosynthesis (ko00908)	[C]	Energy production and conversion	Cytokinin dehydrogenase 1, FAD and cytokinin binding	Cytokinin dehydrogenase 6 OS=Arabidopsis thaliana OX=3702 GN=CKX6 PE=2 SV=2	C	Energy production and conversion	cytokinin dehydrogenase 6-like [Juglans regia]
Cyclocarya_paliurus_newGene_11210	11	0	0	159	137	85	0.116324	0	0	1.26116	1.15966	0.910594	0.00771900545945556	3.78999853799079	up	--	--	Cellular Component: plasma membrane (GO:0005886);; Cellular Component: integral component of membrane (GO:0016021);; Biological Process: transmembrane transport (GO:0055085);;	K22048|0.0e+00|jre:108995855|K22048 mechanosensitive ion channel protein 4/5/6/7/8/9/10 | (RefSeq) mechanosensitive ion channel protein 10-like	--	[M]	Cell wall/membrane/envelope biogenesis	Mechanosensitive ion channel	Mechanosensitive ion channel protein 10 OS=Arabidopsis thaliana OX=3702 GN=MSL10 PE=1 SV=1	M	Cell wall/membrane/envelope biogenesis	mechanosensitive ion channel protein 10-like [Juglans regia]
Cyclocarya_paliurus_newGene_39017	6	0	0	49	90	63	0.12508	0	0	0.690727	1.71576	0.992783	0.00756038193310721	3.78230994285568	up	--		Molecular Function: molecular_function (GO:0003674);; Molecular Function: catalytic activity (GO:0003824);; Molecular Function: protein kinase activity (GO:0004672);; Molecular Function: protein serine/threonine kinase activity (GO:0004674);; Molecular Function: binding (GO:0005488);; Molecular Function: protein binding (GO:0005515);; Molecular Function: calmodulin binding (GO:0005516);; Cellular…	K24104|1.8e-64|thj:104799061|K24104 GPN-loop GTPase | (RefSeq) LOW QUALITY PROTEIN: uncharacterized protein LOC104799061	--	--	--	Protein tyrosine and serine/threonine kinase	G-type lectin S-receptor-like serine/threonine-protein kinase B120 OS=Arabidopsis thaliana OX=3702 GN=B120 PE=2 SV=1	T	Signal transduction mechanisms	hypothetical protein CJ030_MR2G022341 [Morella rubra]
Cyclocarya_paliurus_newGene_6128	8	0	0	144	70	61	0.147587	0	0	3.70211	1.80575	1.87172	0.00778403880321378	3.77866792055666	up	--	--	Biological Process: response to stress (GO:0006950);; Biological Process: cellular response to DNA damage stimulus (GO:0006974);; Biological Process: biological_process (GO:0008150);; Biological Process: response to radiation (GO:0009314);; Biological Process: response to UV (GO:0009411);; Biological Process: response to light stimulus (GO:0009416);; Biological Process: response to abiotic stimul…	K13728|6.8e-84|jre:108987176|K13728 mitotic spindle assembly checkpoint protein MAD2B | (RefSeq) DNA polymerase zeta processivity subunit	--	[D]	Cell cycle control, cell division, chromosome partitioning	--	DNA polymerase zeta processivity subunit OS=Arabidopsis thaliana OX=3702 GN=REV7 PE=2 SV=1	D	Cell cycle control, cell division, chromosome partitioning	hypothetical protein F2P56_004033, partial [Juglans regia]
Cyclocarya_paliurus_newGene_4067	54	0	0	231	1543	797	0.718893	0	0	4.15424	28.8061	17.2246	0.00983297793210462	3.77569692185306	up	[Q]	Secondary metabolites biosynthesis, transport and catabolism	Molecular Function: oxidoreductase activity (GO:0016491);; Molecular Function: metal ion binding (GO:0046872);;	K13229|3.3e-79|ats:109766943|K13229 2,4-dihydroxy-1,4-benzoxazin-3-one-glucoside dioxygenase [EC:1.14.11.59] | (RefSeq) LOC109766943; DIBOA-glucoside dioxygenase BX6-like	Benzoxazinoid biosynthesis (ko00402)	[QR]	Secondary metabolites biosynthesis, transport and catabolism;; General function prediction only	2OG-Fe(II) oxygenase superfamily	1-aminocyclopropane-1-carboxylate oxidase homolog 3 OS=Arabidopsis thaliana OX=3702 GN=At1g06650 PE=2 SV=1	Q	Secondary metabolites biosynthesis, transport and catabolism	1-aminocyclopropane-1-carboxylate oxidase homolog 4-like [Juglans regia]
Cyclocarya_paliurus_newGene_30653	9	0	0	174	137	25	0.123423	0	0	3.69337	2.79365	0.649947	0.0083891182901706	3.76959027935149	up	--	--	Molecular Function: protein serine/threonine phosphatase activity (GO:0004722);;	K17506|7.8e-33|jre:108992910|K17506 protein phosphatase 1L [EC:3.1.3.16] | (RefSeq) probable protein phosphatase 2C 39	--	[T]	Signal transduction mechanisms	Protein phosphatase 2C	Probable protein phosphatase 2C 39 OS=Arabidopsis thaliana OX=3702 GN=At3g15260 PE=2 SV=1	T	Signal transduction mechanisms	probable protein phosphatase 2C 39 [Juglans regia]
Cyclocarya_paliurus_newGene_7832	664	286	0	9667	48160	9165	5.84851	11.0511	0	121.219	641.516	133.333	0.0091349258015461	3.76838341966674	up	--	--	Molecular Function: magnesium ion binding (GO:0000287);; Molecular Function: terpene synthase activity (GO:0010333);;	K15803|1.2e-19|jre:109013556|K15803 (-)-germacrene D synthase [EC:4.2.3.75] | (RefSeq) (-)-germacrene D synthase-like	Sesquiterpenoid and triterpenoid biosynthesis (ko00909)	--	--	Terpene synthase family, metal binding domain	(-)-germacrene D synthase OS=Vitis vinifera OX=29760 GN=VIT_19s0014g04930 PE=1 SV=1	S	Function unknown	(-)-germacrene D synthase-like [Juglans regia]
Cyclocarya_paliurus_newGene_15674	6	0	0	44	85	65	0.291388	0	0	3.06171	6.20941	5.45236	0.0081571138573326	3.74799323471561	up	[HT]	Coenzyme transport and metabolism;; Signal transduction mechanisms	Cellular Component: integral component of membrane (GO:0016021);;	K13457|2.5e-37|vvi:100252764|K13457 disease resistance protein RPM1 | (RefSeq) uncharacterized protein sll1770	Plant-pathogen interaction (ko04626)	[R]	General function prediction only	--	Protein ACTIVITY OF BC1 COMPLEX KINASE 7, chloroplastic OS=Arabidopsis thaliana OX=3702 GN=ABC1K7 PE=1 SV=1	I	Lipid transport and metabolism	protein ACTIVITY OF BC1 COMPLEX KINASE 7, chloroplastic isoform X2 [Juglans regia]
Cyclocarya_paliurus_newGene_26420	7	0	0	132	51	52	0.096589	0	0	2.36728	0.937248	1.1226	0.00831386207094834	3.7475605240612	up	[VI]	Defense mechanisms;; Lipid transport and metabolism	Molecular Function: glutathione peroxidase activity (GO:0004602);; Biological Process: response to oxidative stress (GO:0006979);;	K00432|1.3e-56|cmax:111477267|K00432 glutathione peroxidase [EC:1.11.1.9] | (RefSeq) probable phospholipid hydroperoxide glutathione peroxidase	Glutathione metabolism (ko00480);; Arachidonic acid metabolism (ko00590)	[O]	Posttranslational modification, protein turnover, chaperones	Glutathione peroxidase	Putative glutathione peroxidase 7, chloroplastic OS=Arabidopsis thaliana OX=3702 GN=GPX7 PE=3 SV=2	O	Posttranslational modification, protein turnover, chaperones	probable phospholipid hydroperoxide glutathione peroxidase isoform X2 [Quercus lobata]
Cyclocarya_paliurus_newGene_21790	6	0	0	113	19	76	0.055879	0	0	1.15314	0.222962	0.883125	0.0086290773092103	3.74573526531252	up	[P]	Inorganic ion transport and metabolism	Molecular Function: calcium-transporting ATPase activity (GO:0005388);; Molecular Function: calmodulin binding (GO:0005516);; Molecular Function: ATP binding (GO:0005524);; Cellular Component: integral component of membrane (GO:0016021);;	K01537|0.0e+00|jre:109021209|K01537 P-type Ca2+ transporter type 2C [EC:7.2.2.10] | (RefSeq) calcium-transporting ATPase 9, plasma membrane-type-like	--	[P]	Inorganic ion transport and metabolism	Cation transporting ATPase, C-terminus	Calcium-transporting ATPase 9, plasma membrane-type OS=Arabidopsis thaliana OX=3702 GN=ACA9 PE=2 SV=2	P	Inorganic ion transport and metabolism	calcium-transporting ATPase 9, plasma membrane-type-like [Juglans regia]
Cyclocarya_paliurus_newGene_698	31	0	0	328	450	356	0.256521	0	0	3.62812	5.06519	4.42506	0.00949486193008222	3.74278220906529	up	--	--	Molecular Function: protein kinase activity (GO:0004672);; Molecular Function: ATP binding (GO:0005524);; Cellular Component: integral component of membrane (GO:0016021);;	--	--	--	--	Salt stress response/antifungal	Putative cysteine-rich repeat secretory protein 21 OS=Arabidopsis thaliana OX=3702 GN=CRRSP21 PE=5 SV=2	T	Signal transduction mechanisms	cysteine-rich receptor-like protein kinase 10 [Juglans regia]
Cyclocarya_paliurus_newGene_21395	28	0	0	362	369	269	0.392833	0	0	7.13357	7.51581	6.44756	0.00955815783104649	3.73310396477863	up	--	--	Cellular Component: anaphase-promoting complex (GO:0005680);; Biological Process: cell cycle (GO:0007049);; Biological Process: anaphase-promoting complex-dependent catabolic process (GO:0031145);; Biological Process: cell division (GO:0051301);;	K03357|1.0e-40|jre:108997584|K03357 anaphase-promoting complex subunit 10 | (RefSeq) anaphase-promoting complex subunit 10	Ubiquitin mediated proteolysis (ko04120)	[DO]	Cell cycle control, cell division, chromosome partitioning;; Posttranslational modification, protein turnover, chaperones	Anaphase-promoting complex, subunit 10 (APC10)	Anaphase-promoting complex subunit 10 OS=Arabidopsis thaliana OX=3702 GN=APC10 PE=1 SV=2	--	--	anaphase-promoting complex subunit 10 [Juglans regia]
Cyclocarya_paliurus_newGene_15532	12	0	0	57	325	57	0.21954	0	0	1.41091	8.75174	1.67165	0.00951335718262229	3.7297526676373	up	--	--	--	--	--	--	--	--	Pathogen-related protein OS=Hordeum vulgare OX=4513 PE=2 SV=2	S	Function unknown	pathogen-related protein-like [Juglans regia]
Cyclocarya_paliurus_newGene_22660	18	0	0	156	221	206	0.573973	0	0	6.69595	9.83169	10.6177	0.00947149524885992	3.71603258472713	up	--	--	--	--	--	--	--	--	--	--	--	hypothetical protein F2P56_015884, partial [Juglans regia]
Cyclocarya_paliurus_newGene_9100	23	0	0	276	228	254	0.204153	0	0	3.20634	2.74499	3.64342	0.00997563507527063	3.70191358310432	up	--	--	Cellular Component: ubiquitin ligase complex (GO:0000151);; Molecular Function: molecular_function (GO:0003674);; Molecular Function: nucleic acid binding (GO:0003676);; Molecular Function: RNA binding (GO:0003723);; Molecular Function: binding (GO:0005488);; Molecular Function: protein binding (GO:0005515);; Cellular Component: cellular_component (GO:0005575);; Cellular Component: intracellular …	K11799|8.7e-290|jre:109001247|K11799 DDB1- and CUL4-associated factor 4 | (RefSeq) DDB1- and CUL4-associated factor 4-like	--	[R]	General function prediction only	WD domain, G-beta repeat	--	S	Function unknown	DDB1- and CUL4-associated factor 4-like [Juglans regia]
Cyclocarya_paliurus_newGene_8444	10	0	0	115	101	77	0.192657	0	0	3.17514	2.91283	2.51872	0.00999810164607739	3.66085326019462	up	[O]	Posttranslational modification, protein turnover, chaperones	Molecular Function: transferase activity (GO:0016740);;	K00799|1.2e-109|jre:109012039|K00799 glutathione S-transferase [EC:2.5.1.18] | (RefSeq) glutathione S-transferase U8-like	Glutathione metabolism (ko00480)	[O]	Posttranslational modification, protein turnover, chaperones	Glutathione S-transferase, N-terminal domain	Glutathione S-transferase U8 OS=Arabidopsis thaliana OX=3702 GN=GSTU8 PE=2 SV=1	O	Posttranslational modification, protein turnover, chaperones	glutathione S-transferase U8-like [Juglans regia]
Cyclocarya_paliurus_newGene_5691	154	0	105	2233	2453	2231	1.14971	0	0.744114	23.8287	23.7274	28.4328	0.0095448919559371	3.62138927423851	up	--	--	Molecular Function: transcription factor activity, sequence-specific DNA binding (GO:0003700);; Cellular Component: nucleus (GO:0005634);; Molecular Function: sequence-specific DNA binding (GO:0043565);;	K13424|2.7e-20|lja:Lj0g3v0288169.1|K13424 WRKY transcription factor 33 | (RefSeq) Lj0g3v0288169.1; -	MAPK signaling pathway - plant (ko04016);; Plant-pathogen interaction (ko04626)	--	--	WRKY DNA -binding domain	WRKY transcription factor 72A OS=Solanum lycopersicum OX=4081 GN=WRKY72A PE=2 SV=1	K	Transcription	WRKY transcription factor 72A-like [Juglans regia]
qql_123932	302	5	30	2397	1697	1258	3.15924	0.248786	0.393311	33.6299	24.6121	21.1588	0.0093089276107485	3.45781137060821	up	--	--	Cellular Component: photosystem II (GO:0009523);; Biological Process: photosynthetic electron transport in photosystem II (GO:0009772);; Cellular Component: integral component of membrane (GO:0016021);; Molecular Function: chlorophyll binding (GO:0016168);; Biological Process: protein-chromophore linkage (GO:0018298);; Molecular Function: electron transporter, transferring electrons within the cy…	K02705|0.0e+00|pmum:107880794|K02705 photosystem II CP43 chlorophyll apoprotein | (RefSeq) LOW QUALITY PROTEIN: photosystem II CP43 reaction center protein-like	Photosynthesis (ko00195)	--	--	Photosystem II protein	Photosystem II CP43 reaction center protein OS=Populus alba OX=43335 GN=psbC PE=3 SV=1	P	Inorganic ion transport and metabolism	photosynthetic reaction centre, L/M, Photosystem antenna protein-like protein, plastid [Artemisia annua]
Cyclocarya_paliurus_newGene_22528	0	0	0	182	596	184	0	0	0	0.731238	2.89615	0.884295	1.85598238936735e-05	6.03865	up	--	--	Molecular Function: nucleic acid binding (GO:0003676);; Biological Process: DNA integration (GO:0015074);;	K17545|4.8e-187|zma:103634684|K17545 serine/threonine-protein kinase ULK4 [EC:2.7.11.1] | (RefSeq) uncharacterized protein LOC103634684	--	[R]	General function prediction only	Reverse transcriptase (RNA-dependent DNA polymerase)	Retrovirus-related Pol polyprotein from transposon RE2 OS=Arabidopsis thaliana OX=3702 GN=RE2 PE=4 SV=1	G	Carbohydrate transport and metabolism	Retrovirus-related Pol polyprotein from transposon TNT 1-94 [Vitis vinifera]
Cyclocarya_paliurus_newGene_33422	0	0	0	29	434	121	0	0	0	0.369972	5.89748	1.90143	0.000117795029537531	5.51839	up	[G]	Carbohydrate transport and metabolism	Biological Process: carbohydrate transport (GO:0008643);; Cellular Component: integral component of membrane (GO:0016021);; Molecular Function: transmembrane transporter activity (GO:0022857);;	K24193|2.4e-287|jre:109010449|K24193 MFS transporter, SP family, sugar:H+ symporter | (RefSeq) sugar transport protein 13	--	[R]	General function prediction only	Sugar (and other) transporter	Sugar transport protein 13 OS=Arabidopsis thaliana OX=3702 GN=STP13 PE=1 SV=2	U	Intracellular trafficking, secretion, and vesicular transport	sugar transport protein 13 [Juglans regia]
Cyclocarya_paliurus_newGene_24072	0	0	0	47	60	73	0	0	0	2.34629	2.9165	4.30611	0.000327567443856503	5.14443	up	--	--	Biological Process: signal transduction (GO:0007165);;	K13459|2.6e-11|vvi:100265494|K13459 disease resistance protein RPS2 | (RefSeq) probable disease resistance protein At1g52660	Plant-pathogen interaction (ko04626)	--	--	TIR domain	Disease resistance protein RPV1 OS=Vitis rotundifolia OX=103349 GN=RPV1 PE=1 SV=1	S	Function unknown	hypothetical protein F2P56_024279 [Juglans regia]
Cyclocarya_paliurus_newGene_30684	0	0	0	23	28	26	0	0	0	0.373962	0.476723	0.518981	0.00175117033039181	4.54235	up	--	--	Molecular Function: DNA binding (GO:0003677);; Cellular Component: nucleus (GO:0005634);; Biological Process: regulation of transcription, DNA-templated (GO:0006355);;	K00521|3.0e-42|cmos:111447866|K00521 ferric-chelate reductase [EC:1.16.1.7] | (RefSeq) ferric reduction oxidase 7, chloroplastic-like	--	--	--	No apical meristem (NAM) protein	NAC transcription factor 56 OS=Arabidopsis thaliana OX=3702 GN=NAC056 PE=2 SV=1	K	Transcription	NAC transcription factor 56 [Juglans regia]
qql_019145	0	0	0	16	41	20	0	0	0	0.475302	1.30127	0.732936	0.00194989962284349	4.50478	up	[T]	Signal transduction mechanisms	Molecular Function: nucleic acid binding (GO:0003676);; Molecular Function: protein kinase activity (GO:0004672);; Molecular Function: ATP binding (GO:0005524);; Molecular Function: zinc ion binding (GO:0008270);; Biological Process: DNA integration (GO:0015074);;	K13416|5.6e-31|adu:107481750|K13416 brassinosteroid insensitive 1-associated receptor kinase 1 [EC:2.7.10.1 2.7.11.1] | (RefSeq) BRASSINOSTEROID INSENSITIVE 1-associated receptor kinase 1 isoform X1	MAPK signaling pathway - plant (ko04016);; Plant hormone signal transduction (ko04075);; Plant-pathogen interaction (ko04626)	--	--	Protein tyrosine and serine/threonine kinase	Leucine-rich repeat receptor protein kinase HPCA1 OS=Arabidopsis thaliana OX=3702 GN=HPCA1 PE=1 SV=1	T	Signal transduction mechanisms	probable leucine-rich repeat receptor-like protein kinase At5g49770 [Juglans regia]
qql_124566	320	7	15	1974	2398	2253	6.17087	0.713743	0.35362	50.9311	63.9932	69.7279	0.00612425610831227	3.66491	up	[C]	Energy production and conversion	Cellular Component: mitochondrion (GO:0005739);;	K03878|9.2e-20|nau:109244851|K03878 NADH-ubiquinone oxidoreductase chain 1 [EC:7.1.1.2] | (RefSeq) uncharacterized protein LOC109244851	Oxidative phosphorylation (ko00190)	--	--	NADH dehydrogenase	Uncharacterized mitochondrial protein AtMg01010 OS=Arabidopsis thaliana OX=3702 GN=AtMg01010 PE=4 SV=1	--	--	transmembrane protein [Arabidopsis thaliana]
Cyclocarya_paliurus_newGene_33649	898	179	226	14	19	15	8.96132	4.35577	2.9935	0.134649	0.205056	0.184792	0.00798198552970404	-3.39328	down	[S]	Function unknown	Biological Process: lipid biosynthetic process (GO:0008610);;	K00574|1.6e-76|jre:108979239|K00574 cyclopropane-fatty-acyl-phospholipid synthase [EC:2.1.1.79] | (RefSeq) tuberculostearic acid methyltransferase UfaA1-like isoform X1	--	--	--	Mycolic acid cyclopropane synthetase	--	M	Cell wall/membrane/envelope biogenesis	hypothetical protein F2P56_015843 [Juglans regia]
Cyclocarya_paliurus_newGene_33823	15837	1849	16472	539	372	240	141.414	97.0152	187.625	7.77154	5.01139	3.96829	0.00691345374766354	-3.45841	down	--	--	Biological Process: phloem development (GO:0010088);;	--	--	--	--	Sieve element occlusion N-terminus	Protein SIEVE ELEMENT OCCLUSION B OS=Arabidopsis thaliana OX=3702 GN=SEOB PE=1 SV=1	S	Function unknown	protein SIEVE ELEMENT OCCLUSION B-like [Juglans regia]
Cyclocarya_paliurus_newGene_1939	1676	754	127	71	14	4	25.1726	68.1555	2.38614	1.38935	0.285086	0.076816	0.00950082431538344	-3.51877	down	--	--	Molecular Function: peroxidase activity (GO:0004601);; Cellular Component: extracellular region (GO:0005576);; Biological Process: response to oxidative stress (GO:0006979);; Molecular Function: heme binding (GO:0020037);; Biological Process: hydrogen peroxide catabolic process (GO:0042744);; Molecular Function: metal ion binding (GO:0046872);;	K00430|9.8e-178|jre:109007092|K00430 peroxidase [EC:1.11.1.7] | (RefSeq) peroxidase N1-like	Phenylpropanoid biosynthesis (ko00940)	--	--	Peroxidase	Peroxidase N1 OS=Nicotiana tabacum OX=4097 GN=poxN1 PE=1 SV=1	Q	Secondary metabolites biosynthesis, transport and catabolism	peroxidase N1-like [Juglans regia]
Cyclocarya_paliurus_newGene_22488	368	570	425	27	5	29	3.02062	26.8886	4.33009	0.28205	0.048034	0.361744	0.00767991428673708	-3.52365	down	[Q]	Secondary metabolites biosynthesis, transport and catabolism	Molecular Function: copper ion binding (GO:0005507);; Molecular Function: primary amine oxidase activity (GO:0008131);; Biological Process: amine metabolic process (GO:0009308);; Molecular Function: quinone binding (GO:0048038);;	K00276|3.6e-214|jre:109005849|K00276 primary-amine oxidase [EC:1.4.3.21] | (RefSeq) primary amine oxidase 1	Glycine, serine and threonine metabolism (ko00260);; Tyrosine metabolism (ko00350);; Phenylalanine metabolism (ko00360);; beta-Alanine metabolism (ko00410);; Isoquinoline alkaloid biosynthesis (ko00950);; Tropane, piperidine and pyridine alkaloid biosynthesis (ko00960)	[Q]	Secondary metabolites biosynthesis, transport and catabolism	Copper amine oxidase, enzyme domain	Primary amine oxidase 1 OS=Arabidopsis thaliana OX=3702 GN=AO1 PE=1 SV=1	Q	Secondary metabolites biosynthesis, transport and catabolism	primary amine oxidase 1 [Juglans regia]
Cyclocarya_paliurus_newGene_33366	693	1761	562	48	73	33	3.34912	47.9141	3.3084	0.384809	0.460884	0.252241	0.00660470827038105	-3.59018	down	--	--	Cellular Component: integral component of membrane (GO:0016021);; Cellular Component: mediator complex (GO:0016592);; Biological Process: regulation of phenylpropanoid metabolic process (GO:2000762);;	--	--	--	--	--	Mediator of RNA polymerase II transcription subunit 33A OS=Arabidopsis thaliana OX=3702 GN=MED33A PE=1 SV=1	S	Function unknown	mediator of RNA polymerase II transcription subunit 33A-like isoform X3 [Juglans regia]
Cyclocarya_paliurus_newGene_26683	423	276	1416	26	15	29	2.81299	10.7988	11.997	0.229746	0.123394	0.306617	0.0053115788510985	-3.60798	down	--	--	Cellular Component: integral component of membrane (GO:0016021);;	--	--	--	--	--	--	--	--	uncharacterized protein LOC109022210 [Juglans regia]
Cyclocarya_paliurus_newGene_7256	107	527	289	18	20	6	1.07969	28.6865	3.39844	0.213369	0.254616	0.087669	0.00645336334556814	-3.63834	down	--	--	Molecular Function: AT DNA binding (GO:0003680);; Cellular Component: nucleus (GO:0005634);;	--	--	--	--	Plants and Prokaryotes Conserved (PCC) domain	AT-hook motif nuclear-localized protein 5 OS=Arabidopsis thaliana OX=3702 GN=AHL5 PE=1 SV=1	K	Transcription	AT-hook motif nuclear-localized protein 5-like [Juglans regia]
Cyclocarya_paliurus_newGene_38270	235	530	696	21	29	11	2.03815	27.1643	7.72195	0.242	0.341921	0.151282	0.00512204314656213	-3.65705	down	[T]	Signal transduction mechanisms	Molecular Function: protein kinase activity (GO:0004672);; Molecular Function: ATP binding (GO:0005524);;	K14500|2.0e-214|egu:105059035|K14500 BR-signaling kinase [EC:2.7.11.1] | (RefSeq) probable serine/threonine-protein kinase At5g41260 isoform X1	Plant hormone signal transduction (ko04075)	--	--	Protein tyrosine and serine/threonine kinase	Serine/threonine-protein kinase BSK6 OS=Arabidopsis thaliana OX=3702 GN=BSK6 PE=1 SV=1	T	Signal transduction mechanisms	serine/threonine-protein kinase BSK6-like isoform X1 [Juglans regia]
Cyclocarya_paliurus_newGene_11570	1679	276	2328	65	34	22	7.03204	6.22434	11.3531	0.327989	0.178999	0.13182	0.00423580118673103	-3.68062	down	[R]	General function prediction only	Biological Process: signal transduction (GO:0007165);; Molecular Function: ADP binding (GO:0043531);;	K00695|7.1e-159|mtr:MTR_6g478030|K00695 sucrose synthase [EC:2.4.1.13] | (RefSeq) sucrose synthase	Starch and sucrose metabolism (ko00500)	--	--	TIR domain	Disease resistance protein RPV1 OS=Vitis rotundifolia OX=103349 GN=RPV1 PE=1 SV=1	T	Signal transduction mechanisms	disease resistance protein RPV1-like [Juglans regia]
Cyclocarya_paliurus_newGene_8662	1515	2627	1499	30	84	113	28.0239	279.548	34.5042	0.708897	2.07722	3.28549	0.00507268358418701	-3.68693	down	[J]	Translation, ribosomal structure and biogenesis	Molecular Function: RNA binding (GO:0003723);;	K11294|8.3e-122|jre:109013744|K11294 nucleolin | (RefSeq) 29 kDa ribonucleoprotein A, chloroplastic-like	--	[R]	General function prediction only	RNA recognition motif. (a.k.a. RRM, RBD, or RNP domain)	30 kDa ribonucleoprotein, chloroplastic OS=Nicotiana plumbaginifolia OX=4092 PE=2 SV=1	A	RNA processing and modification	29 kDa ribonucleoprotein A, chloroplastic-like [Juglans regia]
Cyclocarya_paliurus_newGene_34872	2595	1833	3180	78	118	66	23.374	85.9327	32.7326	1.17531	1.29518	0.825166	0.00322285791481852	-3.75367	down	--	--	Cellular Component: nucleus (GO:0005634);; Molecular Function: zinc ion binding (GO:0008270);; Molecular Function: sequence-specific DNA binding (GO:0043565);; Biological Process: positive regulation of transcription, DNA-templated (GO:0045893);;	K09184|2.0e-32|bvg:104896501|K09184 GATA-binding protein, other eukaryote | (RefSeq) hypothetical protein	--	[K]	Transcription	GATA zinc finger	GATA transcription factor 8 OS=Arabidopsis thaliana OX=3702 GN=GATA8 PE=1 SV=1	K	Transcription	GATA transcription factor 8-like [Juglans regia]
Cyclocarya_paliurus_newGene_30104	143	319	311	16	6	7	0.943597	12.2779	2.58415	0.132546	0.054163	0.072586	0.00400487921736465	-3.7819	down	--	--	--	K14780|3.3e-45|dcr:108220614|K14780 ATP-dependent RNA helicase DHX37/DHR1 [EC:3.6.4.13] | (RefSeq) ATP-dependent RNA helicase DEAH13-like isoform X1	--	[G]	Carbohydrate transport and metabolism	Protein of unknown function, DUF604	--	G	Carbohydrate transport and metabolism	hypothetical protein F2P56_020302 [Juglans regia]
Cyclocarya_paliurus_newGene_5604	579	627	20	15	3	15	3.79872	21.8578	0.148397	0.117906	0.024094	0.14028	0.00479776751619044	-3.875	down	--	--	Cellular Component: microtubule (GO:0005874);; Molecular Function: microtubule binding (GO:0008017);;	--	--	--	--	HEAT repeats	TORTIFOLIA1-like protein 3 OS=Arabidopsis thaliana OX=3702 GN=TOR1L3 PE=2 SV=1	S	Function unknown	hypothetical protein F2P56_003584 [Juglans regia]
Cyclocarya_paliurus_newGene_7871	2732	0	1344	7	15	11	53.2719	0	33.6646	0.173125	0.37779	0.302681	0.00688101225951861	-3.89314	down	[G]	Carbohydrate transport and metabolism	Molecular Function: hydrolase activity, hydrolyzing O-glycosyl compounds (GO:0004553);; Cellular Component: cell wall (GO:0005618);; Biological Process: xyloglucan metabolic process (GO:0010411);; Molecular Function: xyloglucan:xyloglucosyl transferase activity (GO:0016762);; Biological Process: cell wall biogenesis (GO:0042546);; Cellular Component: apoplast (GO:0048046);; Biological Process: ce…	K14504|3.7e-114|jre:108983621|K14504 xyloglucan:xyloglucosyl transferase TCH4 [EC:2.4.1.207] | (RefSeq) xyloglucan endotransglucosylase/hydrolase protein 22-like	Plant hormone signal transduction (ko04075)	--	--	Glycosyl hydrolases family 16	Xyloglucan endotransglucosylase/hydrolase protein 22 OS=Arabidopsis thaliana OX=3702 GN=XTH22 PE=1 SV=1	G	Carbohydrate transport and metabolism	xyloglucan endotransglucosylase/hydrolase protein 22-like [Juglans regia]
Cyclocarya_paliurus_newGene_28304	49	653	160	0	9	10	0.523776	37.3005	1.97289	0	0.295766	0.132137	0.00588101472596779	-3.93741	down	--	--	Molecular Function: GTPase activity (GO:0003924);; Molecular Function: GTP binding (GO:0005525);;	K20476|6.8e-16|aly:110228145|K20476 RAB6A-GEF complex partner protein 1 | (RefSeq) LOW QUALITY PROTEIN: RAB6A-GEF complex partner protein 1-like	--	[UR]	Intracellular trafficking, secretion, and vesicular transport;; General function prediction only	Dynamin central region	Dynamin-related protein 1C OS=Arabidopsis thaliana OX=3702 GN=DRP1C PE=1 SV=2	U	Intracellular trafficking, secretion, and vesicular transport	dynamin-related protein 1C-like [Juglans regia]
Cyclocarya_paliurus_newGene_30384	888	258	2199	46	16	12	4.56471	7.56288	13.994	0.301509	0.104976	0.095816	0.00233915720384505	-3.96242	down	--	--	--	--	--	--	--	N-terminal C2 in EEIG1 and EHBP1 proteins	--	S	Function unknown	myosin-J heavy chain-like [Juglans regia]
Cyclocarya_paliurus_newGene_23387	1102	0	2113	15	5	6	9.11786	0	21.6024	0.150592	0.03743	0.067379	0.00587691558436124	-3.97818	down	[G]	Carbohydrate transport and metabolism	Molecular Function: pectate lyase activity (GO:0030570);; Biological Process: pectin catabolic process (GO:0045490);; Molecular Function: metal ion binding (GO:0046872);;	K01728|1.9e-209|jre:108984033|K01728 pectate lyase [EC:4.2.2.2] | (RefSeq) probable pectate lyase 18	Pentose and glucuronate interconversions (ko00040)	--	--	Pectate lyase	Probable pectate lyase 12 OS=Arabidopsis thaliana OX=3702 GN=At3g53190 PE=2 SV=2	G	Carbohydrate transport and metabolism	probable pectate lyase 18 [Juglans regia]
Cyclocarya_paliurus_newGene_13661	385	362	104	0	0	9	4.12336	17.4357	1.7785	0	0	0.108246	0.00610464575759242	-3.9795	down	[M]	Cell wall/membrane/envelope biogenesis	Molecular Function: protein serine/threonine kinase activity (GO:0004674);; Molecular Function: calcium ion binding (GO:0005509);; Molecular Function: ATP binding (GO:0005524);; Cellular Component: integral component of membrane (GO:0016021);; Molecular Function: polysaccharide binding (GO:0030247);;	K23544|2.4e-144|brp:103842861|K23544 serine incorporator 1/3 | (RefSeq) serine incorporator 3	--	--	--	Protein tyrosine and serine/threonine kinase	Wall-associated receptor kinase-like 2 OS=Arabidopsis thaliana OX=3702 GN=WAKL2 PE=2 SV=1	T	Signal transduction mechanisms	wall-associated receptor kinase-like 22 [Juglans regia]
Cyclocarya_paliurus_newGene_89	1281	0	1828	7	4	12	14.8119	0	28.3664	0.059434	0.044135	0.140975	0.00571205056872883	-3.98936	down	--	--	Molecular Function: hydrolase activity, acting on ester bonds (GO:0016788);;	K01969|8.5e-12|mtr:MTR_3g011860|K01969 3-methylcrotonyl-CoA carboxylase beta subunit [EC:6.4.1.4] | (RefSeq) carboxyl transferase domain protein	Valine, leucine and isoleucine degradation (ko00280)	--	--	GDSL-like Lipase/Acylhydrolase	GDSL esterase/lipase At1g29670 OS=Arabidopsis thaliana OX=3702 GN=At1g29670 PE=2 SV=1	L	Replication, recombination and repair	GDSL esterase/lipase At5g45670-like [Juglans regia]
Cyclocarya_paliurus_newGene_16613	2642	1318	4505	101	17	66	12.7408	37.2433	27.5342	0.645954	0.109844	0.495416	0.00174889416016572	-4.05941	down	--	--	--	--	--	--	--	Filament-like plant protein, long coiled-coil	Filament-like plant protein 7 OS=Arabidopsis thaliana OX=3702 GN=FPP7 PE=3 SV=2	S	Function unknown	filament-like plant protein 7 isoform X1 [Juglans regia]
Cyclocarya_paliurus_newGene_19776	1002	0	4112	10	18	5	8.23375	0	39.2474	0.097428	0.18249	0.048172	0.0049382780945636	-4.08576	down	--	--	Cellular Component: cellular_component (GO:0005575);; Cellular Component: cell (GO:0005623);; Cellular Component: plasma membrane (GO:0005886);; Cellular Component: membrane (GO:0016020);; Cellular Component: cell part (GO:0044464);; Cellular Component: cell periphery (GO:0071944);;	--	--	--	--	--	Interactor of constitutive active ROPs 3 OS=Arabidopsis thaliana OX=3702 GN=ICR3 PE=1 SV=1	S	Function unknown	interactor of constitutive active ROPs 3 [Juglans regia]
Cyclocarya_paliurus_newGene_22722	621	561	465	0	0	13	7.67947	21.4464	3.83881	0	0	0.118257	0.00436122669115455	-4.13584	down	--	--	Biological Process: microtubule cytoskeleton organization (GO:0000226);; Biological Process: cell morphogenesis (GO:0000902);; Biological Process: regulation of cell growth (GO:0001558);; Molecular Function: molecular_function (GO:0003674);; Molecular Function: binding (GO:0005488);; Molecular Function: protein binding (GO:0005515);; Cellular Component: cellular_component (GO:0005575);; Cellular …	K21596|4.4e-17|sind:105176456|K21596 calmodulin-binding transcription activator | (RefSeq) protein WVD2-like 2 isoform X1	--	--	--	Targeting protein for Xklp2 (TPX2) domain	Protein WVD2-like 3 OS=Arabidopsis thaliana OX=3702 GN=WDL3 PE=1 SV=1	S	Function unknown	protein WVD2-like 3 isoform X1 [Juglans regia]
Cyclocarya_paliurus_newGene_4759	298	346	917	16	13	5	1.2147	8.19838	4.69602	0.085267	0.07168	0.029986	0.00125833535312136	-4.19415	down	--	--	--	K14677|8.8e-19|ghi:107892630|K14677 aminoacylase [EC:3.5.1.14] | (RefSeq) uncharacterized protein LOC107892630	Arginine biosynthesis (ko00220);; 2-Oxocarboxylic acid metabolism (ko01210);; Biosynthesis of amino acids (ko01230)	[R]	General function prediction only	Endonuclease/Exonuclease/phosphatase family	--	E	Amino acid transport and metabolism	hypothetical protein F2P56_008808 [Juglans regia]
Cyclocarya_paliurus_newGene_26137	1876	1290	1889	21	31	55	26.4642	106.983	33.9991	0.383863	0.59412	1.22208	0.00109752847836239	-4.19737	down	--	--	Cellular Component: cellular_component (GO:0005575);; Cellular Component: intracellular (GO:0005622);; Cellular Component: cell (GO:0005623);; Cellular Component: cytoplasm (GO:0005737);; Cellular Component: endosome (GO:0005768);; Cellular Component: Golgi apparatus (GO:0005794);; Cellular Component: trans-Golgi network (GO:0005802);; Biological Process: response to stress (GO:0006950);; Biologi…	K12472|3.2e-36|cqi:110701739|K12472 epidermal growth factor receptor substrate 15 | (RefSeq) GATA zinc finger domain-containing protein 14-like	Endocytosis (ko04144)	--	--	BURP domain	BURP domain protein RD22 OS=Arabidopsis thaliana OX=3702 GN=RD22 PE=2 SV=1	S	Function unknown	hypothetical protein F2P56_026005, partial [Juglans regia]
Cyclocarya_paliurus_newGene_19872	3007	1074	19	3	33	11	57.4146	112.505	0.434467	0.055908	0.856622	0.301205	0.00206405525415453	-4.28163	down	--	--	Cellular Component: integral component of membrane (GO:0016021);;	--	--	--	--	--	--	--	--	unknown [Zea mays]
Cyclocarya_paliurus_newGene_37225	992	464	1284	18	21	13	5.8552	16.0243	9.59662	0.136644	0.163421	0.120364	0.000747357418066412	-4.29244	down	--	--	--	--	--	--	--	--	--	--	--	hypothetical protein F2P56_012616 [Juglans regia]
Cyclocarya_paliurus_newGene_24829	64	668	241	3	11	0	0.622499	36.9392	2.87355	0.025083	0.129678	0	0.00223747804396558	-4.3466	down	--	--	Molecular Function: enzyme inhibitor activity (GO:0004857);; Molecular Function: pectinesterase activity (GO:0030599);; Biological Process: cell wall modification (GO:0042545);; Molecular Function: aspartyl esterase activity (GO:0045330);; Biological Process: pectin catabolic process (GO:0045490);;	K01051|1.1e-143|jre:108994228|K01051 pectinesterase [EC:3.1.1.11] | (RefSeq) pectinesterase-like	Pentose and glucuronate interconversions (ko00040)	--	--	Plant invertase/pectin methylesterase inhibitor	Probable pectinesterase/pectinesterase inhibitor 40 OS=Arabidopsis thaliana OX=3702 GN=PME40 PE=2 SV=1	G	Carbohydrate transport and metabolism	pectinesterase-like [Juglans regia]
Cyclocarya_paliurus_newGene_34111	304	424	271	8	10	2	2.75005	19.3185	2.57393	0.089357	0.099473	0.017826	0.00085286130771693	-4.40001	down	--	--	--	--	--	--	--	Plant protein of unknown function (DUF936)	--	S	Function unknown	uncharacterized protein LOC109001948 [Juglans regia]
Cyclocarya_paliurus_newGene_4444	192	502	266	4	3	10	0.943551	12.6437	1.44305	0.022849	0.011813	0.064171	0.000790669438592227	-4.47988	down	--	--	Molecular Function: ATP binding (GO:0005524);; Cellular Component: nucleus (GO:0005634);; Biological Process: transcription, DNA-templated (GO:0006351);; Biological Process: regulation of transcription, DNA-templated (GO:0006355);; Biological Process: developmental process (GO:0032502);;	--	--	--	--	--	Growth-regulating factor 5 OS=Oryza sativa subsp. japonica OX=39947 GN=GRF5 PE=2 SV=1	K	Transcription	growth-regulating factor 4-like [Juglans regia]
Cyclocarya_paliurus_newGene_1740	2435	1471	1297	37	14	0	18.205	25.1161	4.78973	1.08807	0.121422	0	0.00121807999460408	-4.51341	down	--	--	Molecular Function: serine-type carboxypeptidase activity (GO:0004185);;	K16296|2.2e-271|jre:108983123|K16296 serine carboxypeptidase-like clade I [EC:3.4.16.-] | (RefSeq) serine carboxypeptidase-like 1	--	[OE]	Posttranslational modification, protein turnover, chaperones;; Amino acid transport and metabolism	Serine carboxypeptidase	Serine carboxypeptidase-like 18 OS=Arabidopsis thaliana OX=3702 GN=SCPL18 PE=2 SV=2	--	--	serine carboxypeptidase-like 1 [Juglans regia]
Cyclocarya_paliurus_newGene_294	1548	1389	677	22	26	15	14.9858	38.8449	4.09218	0.136395	0.167714	0.111345	0.000438383068890284	-4.55214	down	--	--	Molecular Function: DNA binding (GO:0003677);; Molecular Function: ubiquitin-protein transferase activity (GO:0004842);; Cellular Component: nucleus (GO:0005634);; Biological Process: DNA repair (GO:0006281);; Molecular Function: zinc ion binding (GO:0008270);;	K10683|0.0e+00|jre:109011087|K10683 BRCA1-associated RING domain protein 1 | (RefSeq) protein BREAST CANCER SUSCEPTIBILITY 1 homolog	Homologous recombination (ko03440)	[LK]	Replication, recombination and repair;; Transcription	BRCA1 C Terminus (BRCT) domain	Protein BREAST CANCER SUSCEPTIBILITY 1 homolog OS=Arabidopsis thaliana OX=3702 GN=BRCA1 PE=1 SV=1	L	Replication, recombination and repair	protein BREAST CANCER SUSCEPTIBILITY 1 homolog [Juglans regia]
Cyclocarya_paliurus_newGene_36846	150	377	438	0	5	4	1.55751	18.837	4.73749	0	0.056219	0.040814	0.000748030379461223	-4.67303	down	[L]	Replication, recombination and repair	Biological Process: base-excision repair (GO:0006284);; Molecular Function: DNA-3-methyladenine glycosylase activity (GO:0008725);;	K01246|3.0e-91|jre:108995526|K01246 DNA-3-methyladenine glycosylase I [EC:3.2.2.20] | (RefSeq) DNA-3-methyladenine glycosylase	Base excision repair (ko03410)	--	--	Methyladenine glycosylase	--	L	Replication, recombination and repair	DNA-3-methyladenine glycosylase [Juglans regia]
Cyclocarya_paliurus_newGene_28568	3466	1947	10498	62	58	68	20.6845	64.8712	75.673	0.470123	0.455819	0.618804	0.000247047984675542	-4.71036	down	--	--	Biological Process: reproduction (GO:0000003);; Cellular Component: nuclear chromosome (GO:0000228);; Biological Process: nuclear division (GO:0000280);; Cellular Component: condensed chromosome (GO:0000793);; Cellular Component: condensed nuclear chromosome (GO:0000794);; Cellular Component: synaptonemal complex (GO:0000795);; Cellular Component: cellular_component (GO:0005575);; Cellular Compon…	K12811|1.4e-34|bna:106427234|K12811 ATP-dependent RNA helicase DDX46/PRP5 [EC:3.6.4.13] | (RefSeq) uncharacterized protein LOC106427234	Spliceosome (ko03040)	--	--	Weak chloroplast movement under blue light	WEB family protein At3g02930, chloroplastic OS=Arabidopsis thaliana OX=3702 GN=At3g02930 PE=3 SV=1	S	Function unknown	WEB family protein At3g02930, chloroplastic-like [Juglans regia]
Cyclocarya_paliurus_newGene_12925	698	764	5097	23	23	20	5.0799	32.7781	47.312	0.217906	0.226506	0.23078	0.000235104580911576	-4.81175	down	--	--	Cellular Component: endoplasmic reticulum membrane (GO:0005789);; Cellular Component: integral component of membrane (GO:0016021);;	K20720|4.1e-245|jre:109012888|K20720 reticulon-4 | (RefSeq) reticulon-like protein B21	--	--	--	Reticulon	Reticulon-like protein B21 OS=Arabidopsis thaliana OX=3702 GN=RTNLB21 PE=2 SV=2	S	Function unknown	reticulon-like protein B21 [Juglans regia]
Cyclocarya_paliurus_newGene_2247	271	969	613	11	0	4	3.14843	65.8797	9.00907	0.166791	0	0.07235	0.000588625264121788	-4.81672	down	--	--	Biological Process: regulation of transcription, DNA-templated (GO:0006355);; Molecular Function: protein dimerization activity (GO:0046983);;	--	--	--	--	--	Transcription factor BEE 2 OS=Arabidopsis thaliana OX=3702 GN=BEE2 PE=1 SV=1	K	Transcription	transcription factor bHLH63-like [Juglans regia]
Cyclocarya_paliurus_newGene_3255	544	856	133	5	9	6	4.27681	35.7205	1.68267	0.045456	0.085776	0.066469	0.000306690229901717	-4.81804	down	--	--	Cellular Component: microtubule (GO:0005874);; Molecular Function: microtubule binding (GO:0008017);;	--	--	--	--	--	TORTIFOLIA1-like protein 3 OS=Arabidopsis thaliana OX=3702 GN=TOR1L3 PE=2 SV=1	S	Function unknown	TORTIFOLIA1-like protein 4 [Juglans regia]
Cyclocarya_paliurus_newGene_36128	686	436	1083	11	1	9	5.41538	19.6048	11.0308	0.113473	0	0.103201	0.000262959733408754	-4.8247	down	--	--	Molecular Function: transcription factor activity, sequence-specific DNA binding (GO:0003700);;	K20557|1.1e-17|sind:105179533|K20557 transcription factor VIP1 | (RefSeq) transcription factor VIP1	MAPK signaling pathway - plant (ko04016)	--	--	bZIP transcription factor	bZIP transcription factor 29 OS=Arabidopsis thaliana OX=3702 GN=BZIP29 PE=2 SV=1	K	Transcription	uncharacterized protein LOC108983832 [Juglans regia]
Cyclocarya_paliurus_newGene_10538	647	480	343	10	2	4	14.4386	47.2648	9.90227	0.223642	0.046248	0.101192	0.000200521169640993	-4.88056	down	--	--	Cellular Component: nucleosome (GO:0000786);; Molecular Function: DNA binding (GO:0003677);; Cellular Component: nucleus (GO:0005634);; Molecular Function: protein heterodimerization activity (GO:0046982);;	K11251|4.7e-65|jre:108979305|K11251 histone H2A | (RefSeq) histone H2A variant 1	--	[B]	Chromatin structure and dynamics	Core histone H2A/H2B/H3/H4	Histone H2A variant 1 OS=Arabidopsis thaliana OX=3702 GN=H2AV PE=1 SV=1	B	Chromatin structure and dynamics	histone H2A variant 1 [Juglans regia]
Cyclocarya_paliurus_newGene_19836	1627	479	3601	21	14	17	9.02876	14.7916	24.1003	0.148293	0.095629	0.138571	0.000138560243176144	-4.90198	down	--	--	Molecular Function: microtubule motor activity (GO:0003777);; Molecular Function: ATP binding (GO:0005524);; Biological Process: microtubule-based movement (GO:0007018);; Molecular Function: microtubule binding (GO:0008017);;	K10398|0.0e+00|jre:108993968|K10398 kinesin family member 11 | (RefSeq) kinesin-like protein KIN-5D	--	[Z]	Cytoskeleton	Kinesin motor domain	Kinesin-like protein KIN-5D OS=Arabidopsis thaliana OX=3702 GN=KIN5D PE=3 SV=1	Z	Cytoskeleton	kinesin-like protein KIN-5D [Juglans regia]
Cyclocarya_paliurus_newGene_27233	5525	2	1208	0	0	0	63.6243	0.096517	17.7353	0	0	0	0.000521475079883008	-5.08545	down	[QV]	Secondary metabolites biosynthesis, transport and catabolism;; Defense mechanisms	Molecular Function: monooxygenase activity (GO:0004497);; Molecular Function: iron ion binding (GO:0005506);; Molecular Function: oxidoreductase activity, acting on paired donors, with incorporation or reduction of molecular oxygen (GO:0016705);; Molecular Function: heme binding (GO:0020037);;	K07437|3.8e-146|qsu:112027775|K07437 cytochrome P450 family 26 subfamily A | (RefSeq) cytochrome P450 87A3-like	--	[QI]	Secondary metabolites biosynthesis, transport and catabolism;; Lipid transport and metabolism	Cytochrome P450	Cytochrome P450 87A3 OS=Oryza sativa subsp. japonica OX=39947 GN=CYP87A3 PE=2 SV=3	Q	Secondary metabolites biosynthesis, transport and catabolism	cytochrome P450 87A3-like isoform X1 [Juglans regia]
Cyclocarya_paliurus_newGene_22928	1287	894	7884	2	43	4	4.37149	17.1689	32.7814	0.020022	0.196315	0.050639	0.000175274051360591	-5.13164	down	--	--	--	--	--	--	--	--	COP1-interacting protein 7 OS=Arabidopsis thaliana OX=3702 GN=CIP7 PE=1 SV=1	S	Function unknown	uncharacterized protein LOC109004969 isoform X1 [Juglans regia]
Cyclocarya_paliurus_newGene_32957	82	581	274	0	0	2	0.462093	17.8166	2.06556	0	0	0.010323	0.000309158772398177	-5.17339	down	--	--	--	--	--	--	--	--	--	--	--	uncharacterized protein LOC109007460 [Juglans regia]
Cyclocarya_paliurus_newGene_11197	108	537	421	3	4	2	0.931921	27.4333	4.65837	0.033421	0.039356	0.025633	0.000104056635203546	-5.19617	down	--	--	--	K06630|6.3e-11|soe:110789589|K06630 14-3-3 protein epsilon | (RefSeq) uncharacterized protein LOC110789589	--	--	--	Transcription factor regulating root and shoot growth via Pin3	Protein Brevis radix-like 4 OS=Arabidopsis thaliana OX=3702 GN=BRXL4 PE=2 SV=1	S	Function unknown	protein Brevis radix-like 4 [Juglans regia]
Cyclocarya_paliurus_newGene_30485	5427	2006	6496	47	33	26	28.1651	61.386	42.9949	0.32576	0.239698	0.214405	3.79972636265929e-05	-5.22886	down	[QV]	Secondary metabolites biosynthesis, transport and catabolism;; Defense mechanisms	Molecular Function: monooxygenase activity (GO:0004497);; Molecular Function: iron ion binding (GO:0005506);; Cellular Component: integral component of membrane (GO:0016021);; Molecular Function: oxidoreductase activity, acting on paired donors, with incorporation or reduction of molecular oxygen (GO:0016705);; Molecular Function: heme binding (GO:0020037);;	K20770|1.2e-154|gab:108483715|K20770 (+)-delta-cadinene 8-hydroxylase [EC:1.14.-.-] | (RefSeq) flavonoid 3'-monooxygenase-like	--	[Q]	Secondary metabolites biosynthesis, transport and catabolism	Cytochrome P450	Labd-13Z-ene-9,15,16-triol synthase, chloroplastic OS=Vitex agnus-castus OX=54477 GN=CYP76BK1 PE=1 SV=1	Q	Secondary metabolites biosynthesis, transport and catabolism	labd-13Z-ene-9,15,16-triol synthase, chloroplastic-like [Juglans regia]
Cyclocarya_paliurus_newGene_7404	1175	590	1545	4	6	11	6.31227	18.6733	10.5754	0.02854	0.040658	0.087519	3.9101136493752e-05	-5.30986	down	[T]	Signal transduction mechanisms	Molecular Function: protein kinase activity (GO:0004672);; Molecular Function: ATP binding (GO:0005524);; Cellular Component: integral component of membrane (GO:0016021);;	K20718|5.7e-55|bna:106347204|K20718 LRR receptor-like serine/threonine-protein kinase ERECTA [EC:2.7.11.1] | (RefSeq) LRR receptor-like serine/threonine-protein kinase ERL1 isoform X1	MAPK signaling pathway - plant (ko04016)	--	--	Protein kinase domain	Probable LRR receptor-like serine/threonine-protein kinase At1g12460 OS=Arabidopsis thaliana OX=3702 GN=At1g12460 PE=1 SV=1	T	Signal transduction mechanisms	probable LRR receptor-like serine/threonine-protein kinase At1g12460 [Juglans regia]
Cyclocarya_paliurus_newGene_3345	9813	42	29752	0	0	0	92.0618	2.0989	343.814	0	0	0	0.000217651931759734	-5.37981	down	--	--	--	K07904|9.9e-07|crb:17879594|K07904 Ras-related protein Rab-11A | (RefSeq) LOW QUALITY PROTEIN: ras and EF-hand domain-containing protein	Endocytosis (ko04144)	--	--	Protein of unknown function (DUF1645)	--	S	Function unknown	uncharacterized protein LOC109013689 [Juglans regia]
Cyclocarya_paliurus_newGene_32896	6611	249	5324	9	15	22	61.9836	13.576	61.2897	0.100416	0.182406	0.31822	3.49230486112644e-05	-5.43076	down	--	--	Cellular Component: integral component of membrane (GO:0016021);;	--	--	--	--	Plant protein of unknown function	UPF0481 protein At3g47200 OS=Arabidopsis thaliana OX=3702 GN=At3g47200 PE=2 SV=1	O	Posttranslational modification, protein turnover, chaperones	hypothetical protein F2P56_013683, partial [Juglans regia]
Cyclocarya_paliurus_newGene_19897	356	844	257	2	4	1	5.75886	87.8722	5.29648	0.036607	0.093886	0.025054	2.54099792540016e-05	-5.66902	down	--	--	Cellular Component: nucleosome (GO:0000786);; Molecular Function: DNA binding (GO:0003677);; Cellular Component: nucleus (GO:0005634);; Biological Process: nucleosome assembly (GO:0006334);; Cellular Component: host cell nucleus (GO:0042025);; Molecular Function: protein heterodimerization activity (GO:0046982);;	K11254|7.1e-50|adu:107458448|K11254 histone H4 | (RefSeq) histone H4	--	[B]	Chromatin structure and dynamics	Centromere kinetochore component CENP-T histone fold	Histone H4 variant TH011 OS=Triticum aestivum OX=4565 PE=3 SV=2	B	Chromatin structure and dynamics	PREDICTED: uncharacterized protein LOC107825453 [Nicotiana tabacum]
Cyclocarya_paliurus_newGene_36390	8154	4295	1769	0	0	4	37.1641	106.059	10.1796	0	0	0.024465	3.15923208582784e-05	-5.92015	down	[V]	Defense mechanisms	Molecular Function: ATP binding (GO:0005524);; Cellular Component: integral component of membrane (GO:0016021);; Molecular Function: ATPase activity (GO:0016887);; Molecular Function: ATPase activity, coupled to transmembrane movement of substances (GO:0042626);;	K05658|0.0e+00|jre:109000487|K05658 ATP-binding cassette, subfamily B (MDR/TAP), member 1 [EC:7.6.2.2] | (RefSeq) ABC transporter B family member 4-like	ABC transporters (ko02010)	[Q]	Secondary metabolites biosynthesis, transport and catabolism	ABC transporter transmembrane region	ABC transporter B family member 11 OS=Arabidopsis thaliana OX=3702 GN=ABCB11 PE=2 SV=1	Q	Secondary metabolites biosynthesis, transport and catabolism	ABC transporter B family member 4-like [Juglans regia]
Cyclocarya_paliurus_newGene_20110	110	373	512	0	0	0	1.12597	20.7297	5.06006	0	0	0	2.82938744390767e-05	-5.94725	down	[L]	Replication, recombination and repair	Biological Process: DNA replication initiation (GO:0006270);; Biological Process: cell division (GO:0051301);;	K02213|1.6e-221|jre:109009832|K02213 cell division control protein 6 | (RefSeq) cell division control protein 6 homolog B-like isoform X1	--	[LD]	Replication, recombination and repair;; Cell cycle control, cell division, chromosome partitioning	AAA domain	Cell division control protein 6 homolog B OS=Arabidopsis thaliana OX=3702 GN=CDC6B PE=2 SV=1	--	--	cell division control protein 6 homolog B-like isoform X2 [Juglans regia]
Cyclocarya_paliurus_newGene_22038	2072	1100	2129	2	9	3	14.7241	45.4054	19.2483	0.016027	0.071439	0.027316	2.24356989767218e-06	-6.15533	down	[G]	Carbohydrate transport and metabolism	Cellular Component: integral component of membrane (GO:0016021);; Molecular Function: pectate lyase activity (GO:0030570);; Biological Process: pectin catabolic process (GO:0045490);; Molecular Function: metal ion binding (GO:0046872);;	K01728|1.5e-233|jre:108995893|K01728 pectate lyase [EC:4.2.2.2] | (RefSeq) probable pectate lyase 8 isoform X1	Pentose and glucuronate interconversions (ko00040)	--	--	Pectate lyase	Probable pectate lyase 8 OS=Arabidopsis thaliana OX=3702 GN=At3g07010 PE=2 SV=1	G	Carbohydrate transport and metabolism	probable pectate lyase 8 isoform X2 [Juglans regia]
Cyclocarya_paliurus_newGene_34503	406	336	406	0	0	0	8.76101	30.2988	7.92167	0	0	0	8.67920335977062e-06	-6.24471	down	--	--	Molecular Function: metal ion binding (GO:0046872);;	K19720|1.1e-09|cvr:CHLNCDRAFT_142094|K19720 collagen type III alpha | (RefSeq) hypothetical protein	--	[R]	General function prediction only	Zn-finger in Ran binding protein and others	--	S	Function unknown	TATA-binding protein-associated factor 2N [Juglans regia]
Cyclocarya_paliurus_newGene_36366	2068	949	1612	3	2	0	45.9131	123.769	44.1989	0.059749	0.04537	0	1.76699396301711e-06	-6.45135	down	--	--	Cellular Component: cell wall (GO:0005618);; Molecular Function: manganese ion binding (GO:0030145);; Molecular Function: nutrient reservoir activity (GO:0045735);; Cellular Component: apoplast (GO:0048046);;	--	--	--	--	Cupin	Germin-like protein subfamily 2 member 4 OS=Arabidopsis thaliana OX=3702 GN=GLP10 PE=2 SV=1	S	Function unknown	hypothetical protein F2P56_018325, partial [Juglans regia]
Cyclocarya_paliurus_newGene_24309	4126	2670	655	0	0	0	61.4393	253.632	11.8572	0	0	0	4.34529476190501e-06	-6.46495	down	[S]	Function unknown	Molecular Function: hydrolase activity, acting on ester bonds (GO:0016788);;	K00679|9.1e-55|cic:CICLE_v10027727mg|K00679 phospholipid:diacylglycerol acyltransferase [EC:2.3.1.158] | (RefSeq) hypothetical protein	Glycerolipid metabolism (ko00561)	--	--	GDSL-like Lipase/Acylhydrolase	GDSL esterase/lipase At5g33370 OS=Arabidopsis thaliana OX=3702 GN=At5g33370 PE=2 SV=1	I	Lipid transport and metabolism	GDSL esterase/lipase At5g33370-like [Juglans regia]
Cyclocarya_paliurus_newGene_20322	8021	1747	17015	0	0	0	91.6339	114.125	246.466	0	0	0	9.72443248107264e-07	-6.82456	down	[QV]	Secondary metabolites biosynthesis, transport and catabolism;; Defense mechanisms	Molecular Function: monooxygenase activity (GO:0004497);; Molecular Function: iron ion binding (GO:0005506);; Molecular Function: oxidoreductase activity, acting on paired donors, with incorporation or reduction of molecular oxygen (GO:0016705);; Molecular Function: heme binding (GO:0020037);;	K00487|1.1e-289|jre:108996947|K00487 trans-cinnamate 4-monooxygenase [EC:1.14.14.91] | (RefSeq) trans-cinnamate 4-monooxygenase-like	Ubiquinone and other terpenoid-quinone biosynthesis (ko00130);; Phenylpropanoid biosynthesis (ko00940);; Flavonoid biosynthesis (ko00941);; Stilbenoid, diarylheptanoid and gingerol biosynthesis (ko00945)	[Q]	Secondary metabolites biosynthesis, transport and catabolism	Cytochrome P450	Trans-cinnamate 4-monooxygenase OS=Populus kitakamiensis OX=34292 GN=CYP73A16 PE=2 SV=1	Q	Secondary metabolites biosynthesis, transport and catabolism	trans-cinnamate 4-monooxygenase-like [Juglans regia]
Cyclocarya_paliurus_newGene_16791	7741	1795	16778	0	0	0	86.9387	123.491	240.331	0	0	0	9.49231088007857e-07	-6.82996	down	[QV]	Secondary metabolites biosynthesis, transport and catabolism;; Defense mechanisms	Molecular Function: monooxygenase activity (GO:0004497);; Molecular Function: iron ion binding (GO:0005506);; Cellular Component: integral component of membrane (GO:0016021);; Molecular Function: oxidoreductase activity, acting on paired donors, with incorporation or reduction of molecular oxygen (GO:0016705);; Molecular Function: heme binding (GO:0020037);;	K23814|1.9e-287|jre:108993099|K23814 cytochrome P450 family 705 subfamily A [EC:1.14.-.-] | (RefSeq) cytochrome P450 705A12-like	--	[Q]	Secondary metabolites biosynthesis, transport and catabolism	Cytochrome P450	Cytochrome P450 705A22 OS=Arabidopsis thaliana OX=3702 GN=CYP705A22 PE=2 SV=1	Q	Secondary metabolites biosynthesis, transport and catabolism	cytochrome P450 705A12-like [Juglans regia]
Cyclocarya_paliurus_newGene_16530	4736	768	3660	0	0	0	60.0009	52.7516	59.1323	0	0	0	5.97697974208286e-07	-6.91915	down	--	--	Molecular Function: UDP-glycosyltransferase activity (GO:0008194);;	K16266|2.5e-57|mesc:110627793|K16266 cyanohydrin UDP-glucosyltransferase [EC:2.4.1.-] | (RefSeq) linamarin synthase 2	Cyanoamino acid metabolism (ko00460)	[GC]	Carbohydrate transport and metabolism;; Energy production and conversion	UDP-glucoronosyl and UDP-glucosyl transferase	UDP-glycosyltransferase 83A1 OS=Arabidopsis thaliana OX=3702 GN=UGT83A1 PE=2 SV=1	--	--	UDP-glycosyltransferase 83A1-like [Juglans regia]
Cyclocarya_paliurus_newGene_30544	8029	1341	3727	0	0	0	94.6834	86.6049	39.0831	0	0	0	4.07155087915925e-07	-7.00858	down	[G]	Carbohydrate transport and metabolism	Molecular Function: dTDP-glucose 4,6-dehydratase activity (GO:0008460);; Biological Process: nucleotide-sugar metabolic process (GO:0009225);;	K12450|8.4e-180|jre:109000206|K12450 UDP-glucose 4,6-dehydratase [EC:4.2.1.76] | (RefSeq) trifunctional UDP-glucose 4,6-dehydratase/UDP-4-keto-6-deoxy-D-glucose 3,5-epimerase/UDP-4-keto-L-rhamnose-reductase RHM1-like	Amino sugar and nucleotide sugar metabolism (ko00520)	[G]	Carbohydrate transport and metabolism	RmlD substrate binding domain	Trifunctional UDP-glucose 4,6-dehydratase/UDP-4-keto-6-deoxy-D-glucose 3,5-epimerase/UDP-4-keto-L-rhamnose-reductase RHM1 OS=Arabidopsis thaliana OX=3702 GN=RHM1 PE=1 SV=1	G	Carbohydrate transport and metabolism	trifunctional UDP-glucose 4,6-dehydratase/UDP-4-keto-6-deoxy-D-glucose 3,5-epimerase/UDP-4-keto-L-rhamnose-reductase RHM1-like [Juglans regia]
